# Supplementary material for: A metal and a metalloid Lewis acid bridged by a μ2-phosphinidene
Source: Royal Society of Chemistry journal article supplement (doi:10.1039/d4dt01276c), 2024-01-01
Supplement: d4dt01276c1.pdf [file d4dt01276c1.pdf]

Supplementary Information

## A metal and a metalloid Lewis acid bridged by a $\mu_2$ -phosphinidene

David Biskup,<sup>a</sup> Gregor Schnakenburg,<sup>a</sup> Arturo Espinosa Ferao<sup>\*b</sup> and Rainer Streubel<sup>\*a</sup>

<sup>a</sup>*Institut für Anorganische Chemie, Rheinische Friedrich-Wilhelms-Universität Bonn, Gerhard-Domagk-Str. 1, 53121 Bonn, Germany.*

<sup>b</sup>*Departamento de Química Orgánica, Facultad de Química, Campus de Espinardo, Universidad de Murcia, 30100 Murcia, Spain.*

### Table of contents

|   |                                                    |     |
|---|----------------------------------------------------|-----|
| 1 | General methods .....                              | S2  |
| 2 | Experimental procedures and characterisation ..... | S5  |
| 3 | NMR spectra.....                                   | S8  |
| 4 | <i>in situ</i> UV/vis spectra .....                | S21 |
| 5 | X-ray diffraction studies.....                     | S22 |
| 6 | Computational Methods .....                        | S29 |
| 7 | Calculated structures.....                         | S31 |
| 8 | References .....                                   | S46 |

## 1 General methods

All reactions were performed under dried and deoxygenated argon atmosphere using Schlenk or glovebox techniques. The used argon (>99.998%) was purified by a system of three columns (deoxygenation by a BTS copper catalyst (BASF PuriStar® R3-15S) at ca. 100 °C, removing moisture with silica gel, phosphorus pentoxide desiccant with indicator (Sicapent®) and calcium chloride). Glassware, spatulae, cannulae as well as filter papers were dried in a compartment dryer at 110 °C for at least one hour. Additionally, the glassware was heated with a heat gun (up to 550 °C) under active vacuum (<0.02 mbar) and filled with argon three times. Sterile syringes were purged with argon three times before use. The solvents were dried by standard procedures<sup>1</sup> by refluxing over proper desiccants under an argon atmosphere (*n*-pentane and toluene over sodium wire ( $\varnothing = 2$  mm); diethyl ether stabilized with 3,5-di-*tert*-butyl-4-hydroxytoluene (BHT) and tetrahydrofuran over benzophenone and sodium wire; dichloromethane over calcium hydride) for several days and distilled before use. Alternatively, diethyl ether and toluene were dried using a MBraun SPS-800 solvent purification system. For filtration stainless steel cannulae ( $\varnothing = 1$  mm and 2 mm) with Whatman® glass microfiber filters (grade GF/B) were used if not stated otherwise. After use, devices made of stainless steel were cleaned with acetone, water and diluted hydrochloric acid and glassware by storage in a concentrated solution of potassium hydroxide in isopropanol for at least two days and in diluted hydrochloric acid for one day. Afterwards, the glassware was washed with water and soap, acetone and petroleum ether 40/65. All joints were greased with OKS 1112 grease or with PTFE paste (Carl Roth). Vacuum was applied by a rotary vane pump (vacuubrand RZ6) enabling pressures <10<sup>-2</sup> mbar.

NMR spectra were recorded on a Bruker Avance I 300 MHz, Bruker Avance I 400 MHz, Bruker Avance I 500 MHz or Bruker Avance III HD Ascend 500 MHz spectrometer at the NMR department of the University of Bonn and subsequently analysed by the program *Mestrenova 14.2*. The calibration of the <sup>1</sup>H and <sup>13</sup>C NMR spectra was done via the solvent residual signals relative to tetramethylsilane (<1% in CDCl<sub>3</sub>) (C<sub>6</sub>D<sub>6</sub>:  $\delta(^1\text{H}) = 7.16$  ppm and  $\delta(^{13}\text{C}) = 128.06$  ppm, CD<sub>2</sub>Cl<sub>2</sub>:  $\delta(^1\text{H}) = 5.32$  ppm and  $\delta(^{13}\text{C}) = 53.84$  ppm).<sup>2</sup> <sup>11</sup>B NMR spectra were measured relative to BF<sub>3</sub>·OEt<sub>2</sub> in CDCl<sub>3</sub> as external reference by using the <sup>2</sup>H frequency of the deuterated solvent (lock frequency) and the frequency ratio value  $\Xi(^{11}\text{B}) = 32.083974\%$ , and <sup>31</sup>P NMR spectra relative to 85% H<sub>3</sub>PO<sub>4</sub> in water using the <sup>2</sup>H frequency of the deuterated solvent (lock frequency) and the frequency ratio value  $\Xi(^{31}\text{P}) = 40.480742\%$ .<sup>3</sup> All lock frequencies were calibrated internally against the <sup>1</sup>H signals of solutions of tetramethylsilane with a volume fraction of  $\Phi \leq 1\%$  in the corresponding deuterated solvent. The used deuterated solvents were purified by distillation over proper desiccants (C<sub>6</sub>D<sub>6</sub> and THF-*d*<sub>8</sub> over a potassium mirror, CD<sub>2</sub>Cl<sub>2</sub> over CaH<sub>2</sub>, and CD<sub>3</sub>CN over CaH<sub>2</sub> and P<sub>2</sub>O<sub>5</sub>), trap-to-trap recondensation and degassing by three freeze-pump-thaw cycles. The purified solvent was stored over 3 Å or 4 Å molecular sieves. The chemical shift ( $\delta$ ) is given in parts per million (ppm) and the coupling constant ( $^nJ_{x,y}$ ) in Hertz (Hz) as absolute values

neglecting the sign where  $n$  is the number of bonds between the coupling nuclei X and Y. For assigning the multiplicity following abbreviations were used: s = singlet, d = doublet, ddd = doublet of doublets of doublets, m = multiplet, sat = satellites and br = broad. For  $^1\text{H}$  NMR spectra additionally the number of nuclei is given accordingly which is determined via integration. The  $^1\text{H}$  and  $^{13}\text{C}$  NMR signals of compounds were assigned by a combination of COSY, HSQC and HMBC experiments to unequivocally assign protons and carbon resonances if necessary. All measurements were performed at ambient temperature (298 K) if not stated otherwise.

Mass spectra using electrospray ionisation (ESI) or atmospheric pressure chemical ionisation (APCI) were recorded on a Thermo Fisher Scientific Orbitrap XL spectrometer with an HPLC autosampler using acetonitrile or dichloromethane as solvents. The solutions were prepared in a glovebox using dried, recondensed and degassed solvents. Only selected data are given for detected ions. The peaks are given in mass-to-charge ratio ( $m/z$ ) while only the isotopomer with the highest relative abundance is represented. Additionally, the relative intensities of the peaks are given in parentheses and the proposed molecule fragments in square brackets if not stated otherwise. High resolution mass spectra (HRMS) that were obtained using ESI or APCI were recorded in a single measurement and, hence, no standard deviations for were obtained.

ATR-IR spectra of solids were recorded in the spectral range of 4000–400  $\text{cm}^{-1}$  on a Bruker Alpha FTIR spectrometer with a single-reflection ATR measurement attachment (Platinum-ATR Diamond) or a Shimadzu IRSpirit FTIR spectrometer with a single-reflection ATR measurement attachment (QATR-S) in a glovebox at ambient temperature. For apodization the Happ-Genzel function was used. All analyses were performed using the programs *EZ OMNIC 7.3* of Fisher Scientific, *OPUS* of Bruker and *LabSolutions IR 2.26* of Shimadzu. Only selected wavenumbers of the absorption bands are given using reciprocal centimetres ( $\text{cm}^{-1}$ ). The intensities of the bands are marked as very strong (vs), strong (s), medium (m) or weak (w).

Melting points were measured using an SRS DigiMelt device or a Büchi melting point determination device according to Dr. Tottoli. The samples were flame-sealed in a glass capillary ( $\varnothing = 0.1$  mm) *in vacuo* (<0.02 mbar) and heated quickly (ca. 5 K/min) for a rough determination of the melting point or decomposition temperature. Afterwards, a heating rate of approximately 2 K/min was used until the sample melted or decomposed. The thermally treated samples were cooled to ambient temperature and studied by  $^1\text{H}$  and/or  $^{31}\text{P}$  NMR spectroscopy to confirm whether decomposition had occurred. No internal or external temperature corrections were performed.

UV/vis spectra were measured using the spectrometer UV-1650PC of Shimadzu with a double-beam optics photometric system and a maximum wavelength range of 190.0 to 1100 nm, a spectra band width of 2 nm and a wavelength accuracy of  $\pm 0.5$  nm with an automatic wavelength correction. To

avoid the measurement of the lamp interchange of the 50 W halogen lamp (340.8 nm) all spectra were measured between 350 to 700 nm. Before the measurement of the analyte solution, an automatic baseline correction was performed (baseline stability:  $\pm 0.001$  abs./hour). A silicon photodiode was used as detector with a photometric range of  $-0.5$  to  $3.999$  abs. with an accuracy of  $\pm 0.004$  abs. at  $1.0$  abs. ( $\pm 0.002$  abs. at  $0.5$  abs.). The used cuvettes (Hellma precision cells 110-QS) ( $46$  mm  $\times$   $12.5$  mm  $\times$   $12.5$  mm) were made of quartz glass (Suprasil<sup>®</sup> quartz, Heraeus) with two polished windows. The used cuvettes had a spectral range of  $200$  to  $2500$  nm, a light pathlength of  $10$  mm and a chamber volume of  $3.5$   $\mu$ L. For the *in situ* measurements an aliquot of the reaction mixture was taken in the glovebox and diluted by the same solvent which was used in the experiment until only a light colour was visible. The diluted analyte solution was then added to the cuvettes, closed with a PTFE stopper and quickly transported to the spectrometer outside of the glovebox, and the measurement was started immediately. The determination of the extinction coefficient was not possible for the *in situ* measurements due to the involvement of air sensitive compounds and the variable amount of analyte in the reaction mixture.

Single crystal X-ray diffraction analyses were performed on a Bruker D8 Venture diffractometer, equipped with a low-temperature device (Oxford Cryostream 800 series) at  $100(2)$  K by using graphite monochromated Mo- $K_{\alpha}$  radiation ( $\lambda = 0.71073$  Å). Intensities were measured by fine-slicing  $\Phi$  and  $\omega$  scans and corrected background, polarization and Lorentz effects. A semi-empirical absorption correction was applied for the data sets following Blessing's method.<sup>4</sup> The structure was solved by direct methods and refined anisotropically by the least-squares procedure implemented in ShelX program system.<sup>5</sup> All non-hydrogen atoms were refined anisotropically. The hydrogen atoms were included isotropically refined using a riding model at the bound carbon atoms. The program Olex2 1.5<sup>6</sup> of OlexSys was used for analyses and the ellipsoid representations of the molecular structures with the probability level set to 50%. Crystallographic data for the structures reported in this paper have been deposited with the Cambridge Crystallographic Data Centre as supplementary publication numbers 2320467 (5) and 2320468 (6) which can be obtained free of charge via [www.ccdc.cam.ac.uk/data\\_request/cif](http://www.ccdc.cam.ac.uk/data_request/cif).

## 2 Experimental procedures and characterisation

### Synthesis of complex 5

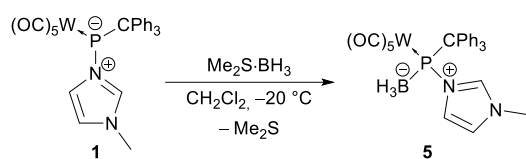

0.03 mL (0.32 mmol, 1.3 eq.) of borane dimethylsulfide was added dropwise to a solution of 0.165 g (0.24 mmol, 1.0 eq.) of complex **1** in 3.0 mL of dichloromethane at  $-20\text{ }^\circ\text{C}$ . The solution was stirred for 70 minutes at  $-20\text{ }^\circ\text{C}$  and then warmed up to ambient temperature within 3 minutes. Afterwards, 8.0 mL of *n*-pentane were added to the formed colourless turbid solution under formation of a colourless precipitate. The colourless solution was filtered off using a filter cannula ( $\varnothing = 1\text{ mm}$ ) with a Whatman<sup>®</sup> 595 filter paper. The colourless solid residue was washed two times with 4 mL of *n*-pentane at ambient temperature and then dried *in vacuo* for 45 minutes. Yield: 0.149 g (0.21 mmol, 89%). Mp  $173\text{ }^\circ\text{C}$  (dec.). IR (ATR Diamond):  $\nu_{\text{max}} / \text{cm}^{-1} = 1910$  (vs) (CO), 1974 (w) (CO), 2064 (m) (CO), 2402 (w) (BH), 3155 (w) (CH).  $^1\text{H}$  NMR (400.13 MHz,  $\text{CD}_2\text{Cl}_2$ , 298 K):  $\delta / \text{ppm} = 8.13$  (s, 1H; Im), 7.81 (br s, 2H; *ortho*-CH), 7.62 (br s, 2H; *ortho*-CH), 7.44–7.12 (m, 9H;  $\text{CPh}_3$ ), 6.93–6.92 (m, 1H; Im), 6.85 (s, 1H; Im), 6.45 (br s, 2H; *ortho*-CH), 3.73 (s, 3H;  $\text{NCH}_3$ ), 1.78–1.00 (br m, 3H;  $\text{BH}_3$ ).  $^{11}\text{B}\{^1\text{H}\}$  NMR (128.38 MHz,  $\text{CD}_2\text{Cl}_2$ , 298 K):  $\delta / \text{ppm} = -24.9$  (s).  $^{11}\text{B}$  NMR (128.38 MHz,  $\text{CD}_2\text{Cl}_2$ , 298 K):  $\delta / \text{ppm} = -24.9$  (br s).  $^{13}\text{C}\{^1\text{H}\}$  NMR (100.63 MHz,  $\text{CD}_2\text{Cl}_2$ , 298 K):  $\delta / \text{ppm} = 201.4$  (d,  $^2J_{\text{P,C}} = 23.3\text{ Hz}$ ; *trans*-CO), 198.7 (d<sub>sat</sub>,  $^1J_{\text{P,C}} = 127.5\text{ Hz}$ ,  $^2J_{\text{P,C}} = 4.7\text{ Hz}$ ; *cis*-CO), 146.8 (s; *ipso*-C), 140.5 (s; Im), 132.1 (br s; *ortho*-CH), 131.5 (d,  $J_{\text{P,C}} = 4.9\text{ Hz}$ ; Ph), 128.5 (br s; *ortho*-CH), 128.2 (s; Ph), 127.9 (d,  $J_{\text{P,C}} = 1.2\text{ Hz}$ ; Ph), 127.6 (br s; *ortho*-CH), 126.4 (d,  $J_{\text{P,C}} = 1.6\text{ Hz}$ ; Im), 122.4 (s; Ph), 121.4 (s; Im), 64.7 (d,  $^1J_{\text{P,C}} = 12.0\text{ Hz}$ ;  $\text{CPh}_3$ ), 36.6 (s;  $\text{CH}_3$ ).  $^{31}\text{P}\{^1\text{H}\}$  NMR (162.00 MHz,  $\text{CD}_2\text{Cl}_2$ , 298 K):  $\delta / \text{ppm} = 163.5$  (s).  $^{31}\text{P}$  NMR (162.00 MHz,  $\text{CD}_2\text{Cl}_2$ , 298 K):  $\delta / \text{ppm} = 163.5$  (s). MS (APCI pos., selected data):  $m/z$  (%) = 693.094 (100) [ $M\text{-H}$ ]<sup>+</sup>, 555.052 (48) [ $M\text{-H-2CO-N-Melm}$ ]<sup>+</sup>, 371.184 (80) [ $M\text{-W}(\text{CO})_5\text{+H}$ ]<sup>+</sup> 243.117 (85) [ $\text{CPh}_3$ ]<sup>+</sup>. MS (ESI pos., selected data):  $m/z$  (%) = 691.076 (97) [ $M\text{-3H}$ ]<sup>+</sup>. HRMS (APCI pos.):  $m/z$  calcd for [ $\text{C}_{28}\text{H}_{23}\text{BN}_2\text{O}_5\text{PW}$ ]<sup>+</sup>: 693.0950; found: 693.0944. HRMS (ESI pos.):  $m/z$  calcd for [ $\text{C}_{28}\text{H}_{21}\text{BN}_2\text{O}_5\text{PW}$ ]<sup>+</sup>: 691.0795; found: 691.0767.

## Synthesis of complex 6

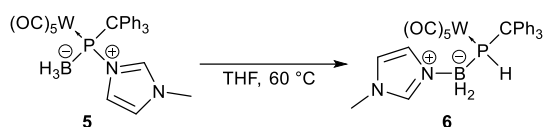

A solution of 0.121 g (0.17 mmol, 1.0 eq.) of the compound **5** in THF was stirred for 22 hours at 60 °C. All volatiles of the pale yellow solution were removed *in vacuo* at 60 °C and further dried under the same conditions for 45 minutes. The obtained pale yellow solid was redissolved in 15 mL of diethyl ether. 40 mL of *n*-pentane were added to the pale yellow solution at ambient temperature. The solution was stirred for 45 minutes at –80 °C to form a pale yellow fine suspension. The pale yellow solution was filtered off using a filter cannula ( $\varnothing = 1$  mm) with a Whatman® 595 filter paper at –80 °C. The pale yellow solid residue was washed two times with *n*-pentane at –80 °C and then dried *in vacuo* for 21.5 hours at ambient temperature. Yield: 0.090 g (0.13 mmol, 75%). Mp 166 °C. IR (ATR Diamond):  $\nu_{\text{max}} / \text{cm}^{-1} = 1895$  (vs) (CO), 1979 (w) (CO), 1993 (w) (CO), 2062 (m) (CO), 2386 (w) (BH), 3010 (w) (CH), 3154 (w) (CH).  $^1\text{H}$  NMR (500.04 MHz,  $\text{CD}_3\text{CN}$ , 298 K):  $\delta / \text{ppm} = 7.36\text{--}7.33$  (m, 6H;  $\text{CPh}_3$ ), 7.28–7.21 (m, 9H;  $\text{CPh}_3$ ), 6.94–6.92 (m, 1H; Im), 6.65–6.63 (m, 1H; Im), 6.60 (s, 1H; Im), 5.38 (ddd,  $^1J_{\text{P,H}} = 289.11$  Hz,  $^3J_{\text{H,H}} = 6.48$  Hz,  $^3J_{\text{H,H}} = 1.77$  Hz, 1H; PH), 3.51 (s, 3H;  $\text{NCH}_3$ ), 2.95 (br d,  $^2J_{\text{P,H}} = 57.3$  Hz, 2H;  $\text{BH}_2$ ).  $^{11}\text{B}\{^1\text{H}\}$  NMR (128.38 MHz,  $\text{THF-}d_8$ , 298 K):  $\delta / \text{ppm} = -13.3$  (s).  $^{11}\text{B}$  NMR (128.38 MHz,  $\text{THF-}d_8$ , 298 K):  $\delta / \text{ppm} = -13.4$  (s).  $^{13}\text{C}\{^1\text{H}\}$  NMR (125.75 MHz,  $\text{CD}_3\text{CN}$ , 298 K):  $\delta / \text{ppm} = 201.7$  (d,  $^2J_{\text{P,C}} = 17.8$  Hz; *trans*-CO), 199.1 ( $d_{\text{sat}}$ ,  $^1J_{\text{W,C}} = 125.9$  Hz,  $^2J_{\text{P,C}} = 5.5$  Hz; *cis*-CO), 147.1 (s; *ipso*-C), 139.0 (d,  $J_{\text{P,C}} = 3.10$  Hz; Im), 131.6 (d,  $J_{\text{P,C}} = 4.9$  Hz; Ph), 128.6 (s; Ph), 127.5 (d,  $J_{\text{P,C}} = 2.0$  Hz; Ph), 127.1 (d,  $J_{\text{P,C}} = 1.6$  Hz; Im), 123.0 (s; Im), 57.9 (d,  $^1J_{\text{P,C}} = 8.7$  Hz;  $\text{CPh}_3$ ), 35.4 (s;  $\text{CH}_3$ ).  $^{15}\text{N}\{^1\text{H}\}$  NMR (50.68 MHz,  $\text{CD}_3\text{CN}$ , 298 K):  $\delta / \text{ppm} = -182.8$  (s; P-N), –212.5 (s; N- $\text{CH}_3$ ).  $^{31}\text{P}\{^1\text{H}\}$  NMR (162.00 MHz,  $\text{THF-}d_8$ , 298 K):  $\delta / \text{ppm} = -38.3$  (br s).  $^{31}\text{P}$  NMR (162.00 MHz,  $\text{THF-}d_8$ , 298 K):  $\delta / \text{ppm} = -38.3$  (br d,  $^1J_{\text{P,H}} = 289.3$  Hz). MS (APCI pos., selected data):  $m/z$  (%) = 693.095 (74) [ $M\text{--H}$ ] $^+$ , 555.052 (44) [ $M\text{--H--}2\text{CO--N--MeIm}$ ] $^+$ , 371.184 (19) [ $M\text{--W(CO)}_5\text{+H}$ ] $^+$ , 243.117 (100) [ $\text{CPh}_3$ ] $^+$ . MS (ESI pos., selected data):  $m/z$  (%) = 371.182 (100) [ $M\text{--W(CO)}_5\text{+H}$ ] $^+$ , 243.116 (54) [ $\text{CPh}_3$ ] $^+$ . HRMS (APCI pos.):  $m/z$  calcd for [ $\text{C}_{28}\text{H}_{23}\text{BN}_2\text{O}_5\text{PW}$ ] $^+$ : 693.0952; found: 693.0950.

## Generation of complex 3

Via [ $\text{W(CO)}_5\text{(NCMe)}$ ]: 9.3 mg (0.03 mmol, 1.7 eq.) of [ $\text{W(CO)}_5\text{(NCMe)}$ ] were added to a solution of 10.3 mg (0.02 mmol, 1.0 eq.) of compound **1** in 0.5 mL of benzene- $d_6$ . The solution was stirred for 6 h at ambient temperature to form a deep violet solution. Content in reaction mixture: 4% (by  $^{31}\text{P}\{^1\text{H}\}$  NMR integration).  $^{31}\text{P}\{^1\text{H}\}$  NMR (121.59 MHz,  $\text{C}_6\text{D}_6$ , 298 K):  $\delta / \text{ppm} = 811.2$  (s). UV/vis (THF):  $\lambda_{\text{max}} = 540$  nm.

Via  $[\text{W}(\text{CO})_5(\text{thf})]$ : 0.5 mL (0.04 mmol, 2.8 eq.) of a freshly prepared  $[\text{W}(\text{CO})_5(\text{thf})]$  solution ( $c = 83 \text{ mM}$  in THF) were added to a solution of 10.3 mg (0.02 mmol, 1.0 eq.) of compound **1** in THF. The solution was stirred at ambient temperature for 6.5 h to obtain a deep violet solution. Content in reaction mixture 46% (by  $^{31}\text{P}\{^1\text{H}\}$  NMR integration).  $^{31}\text{P}\{^1\text{H}\}$  NMR (121.51 MHz, THF, 298 K):  $\delta / \text{ppm} = 791.4$  ( $s_{\text{sat}}$ ,  $^1J_{\text{W,P}} = 185.2 \text{ Hz}$ ).

#### Generation of complex **4**

24.5 mg (0.05 mmol, 3.4 eq.) of  $\text{B}(\text{C}_6\text{F}_5)_3$  were added to a solution of 9.5 mg (0.01 mmol, 1.0 eq.) of compound **1** in 0.5 mL of benzene- $d_6$ . The solution was stirred for 6.5 h to obtain a turquoise-blue solution. Content in reaction mixture: 24% (by  $^{31}\text{P}\{^1\text{H}\}$  NMR integration).  $^{31}\text{P}\{^1\text{H}\}$  NMR (121.51 MHz,  $\text{C}_6\text{D}_6$ , 298 K):  $\delta / \text{ppm} = 1040.3$  ( $s_{\text{sat}}$ ,  $^1J_{\text{W,P}} = 180.1 \text{ Hz}$ ). UV/vis ( $\text{C}_6\text{H}_6$ ):  $\lambda_{\text{max}} = 603 \text{ nm}$ .

### 3 NMR spectra

#### Compound 5

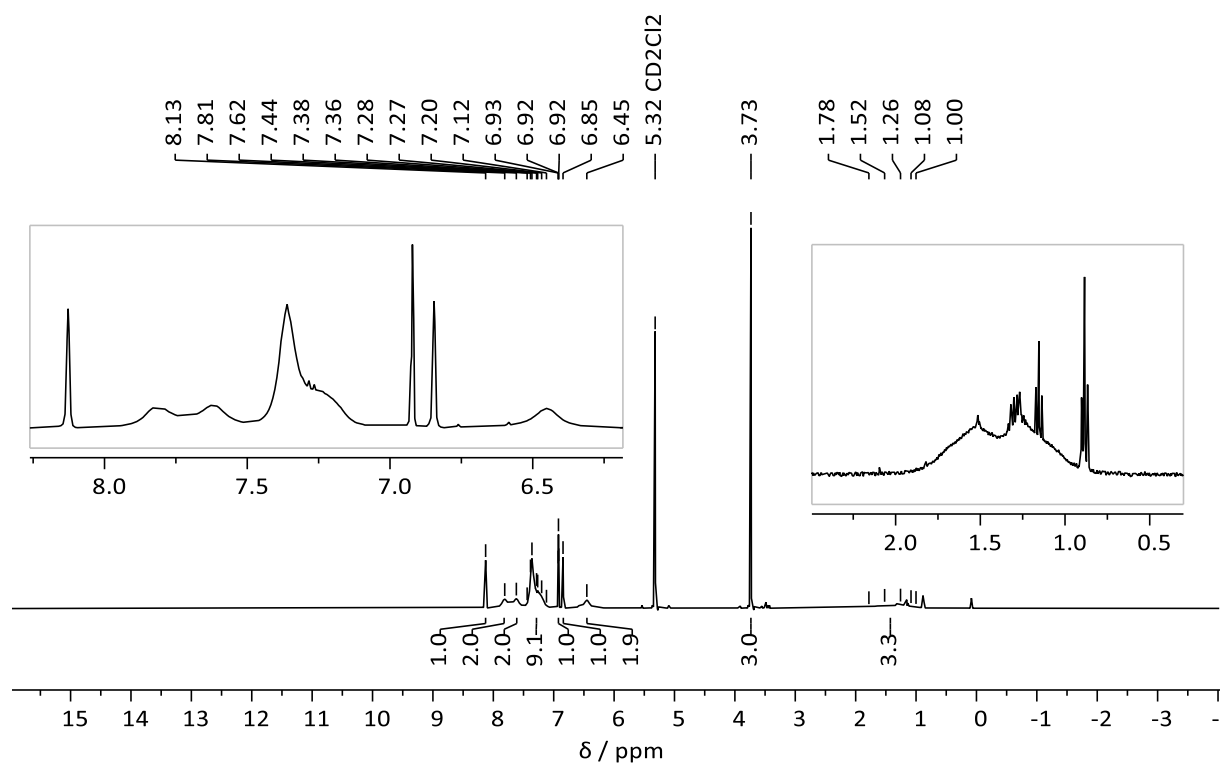

Fig. S1 <sup>1</sup>H NMR spectrum (400.13 MHz, CD<sub>2</sub>Cl<sub>2</sub>, 298 K) of compound 5.

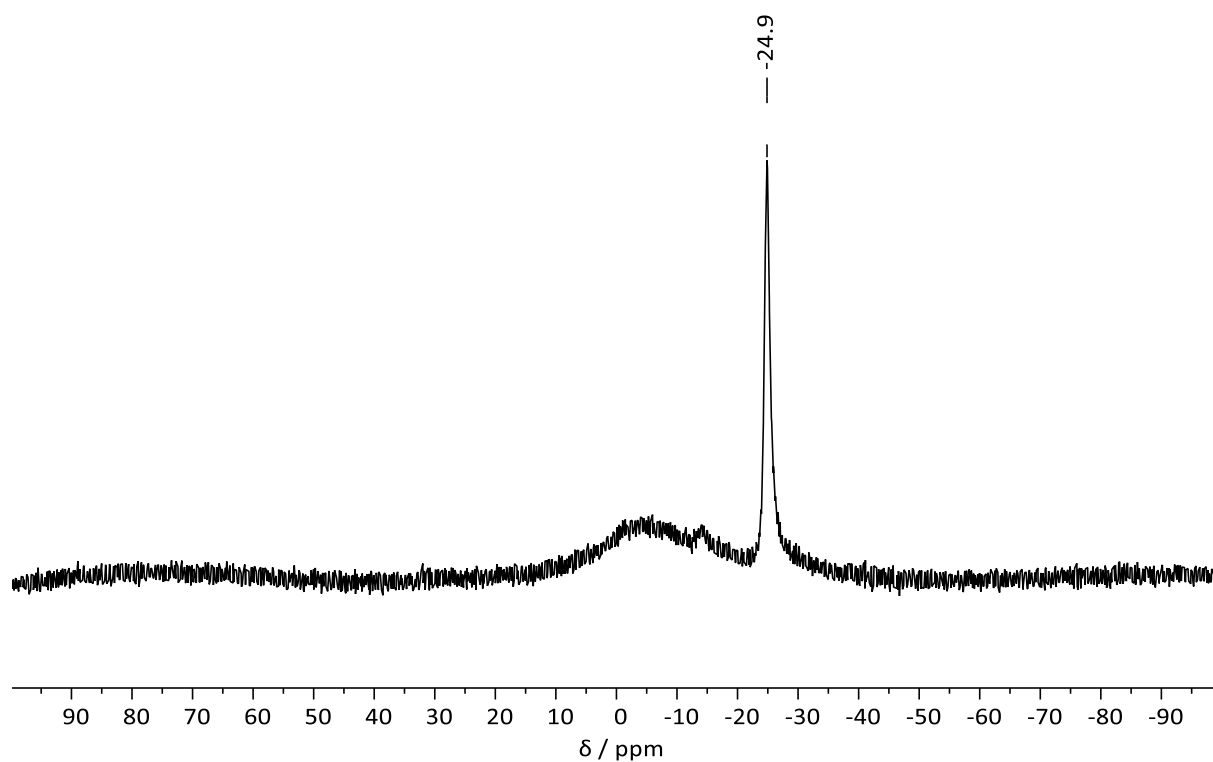

Fig. S2 <sup>11</sup>B{<sup>1</sup>H} NMR spectrum (128.38 MHz, CD<sub>2</sub>Cl<sub>2</sub>, 298 K) of compound 5.



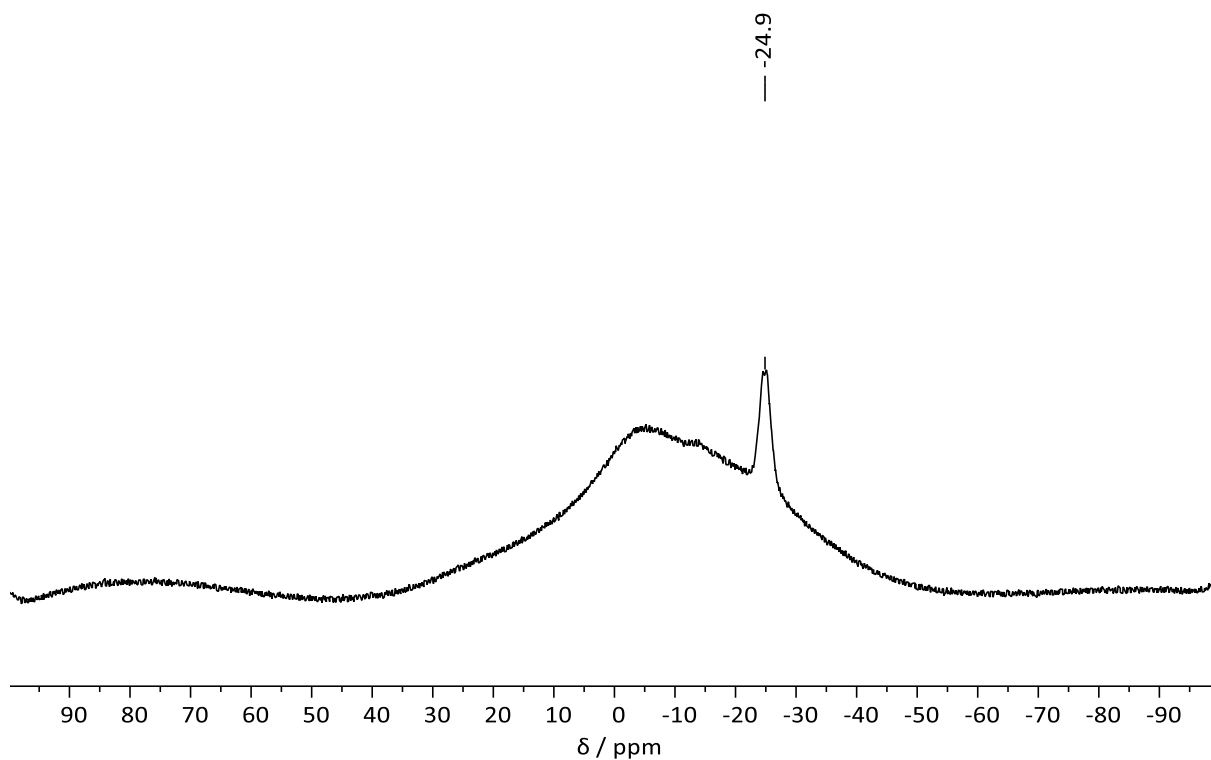

**Fig. S3**  $^{11}\text{B}$  NMR spectrum (128.38 MHz,  $\text{CD}_2\text{Cl}_2$ , 298 K) of compound 5.

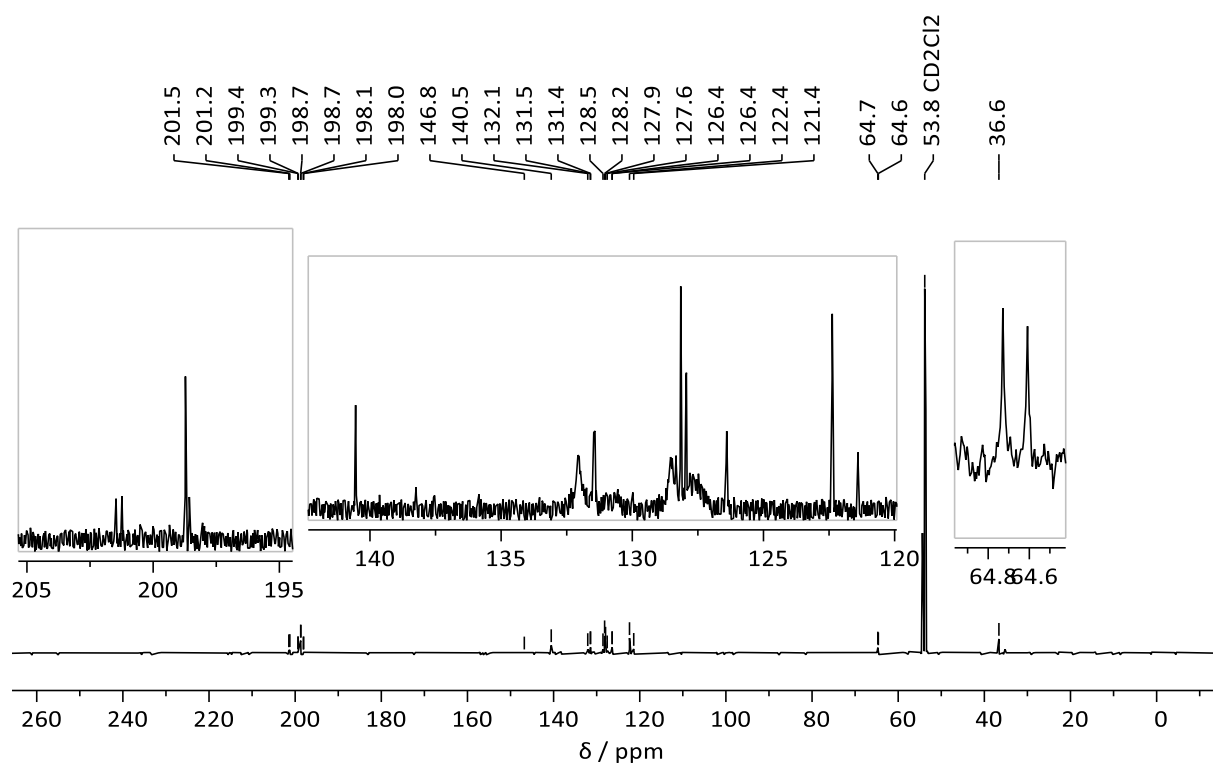

**Fig. S4**  $^{13}\text{C}\{^1\text{H}\}$  NMR spectrum (100.63 MHz,  $\text{CD}_2\text{Cl}_2$ , 298 K) of compound 5.

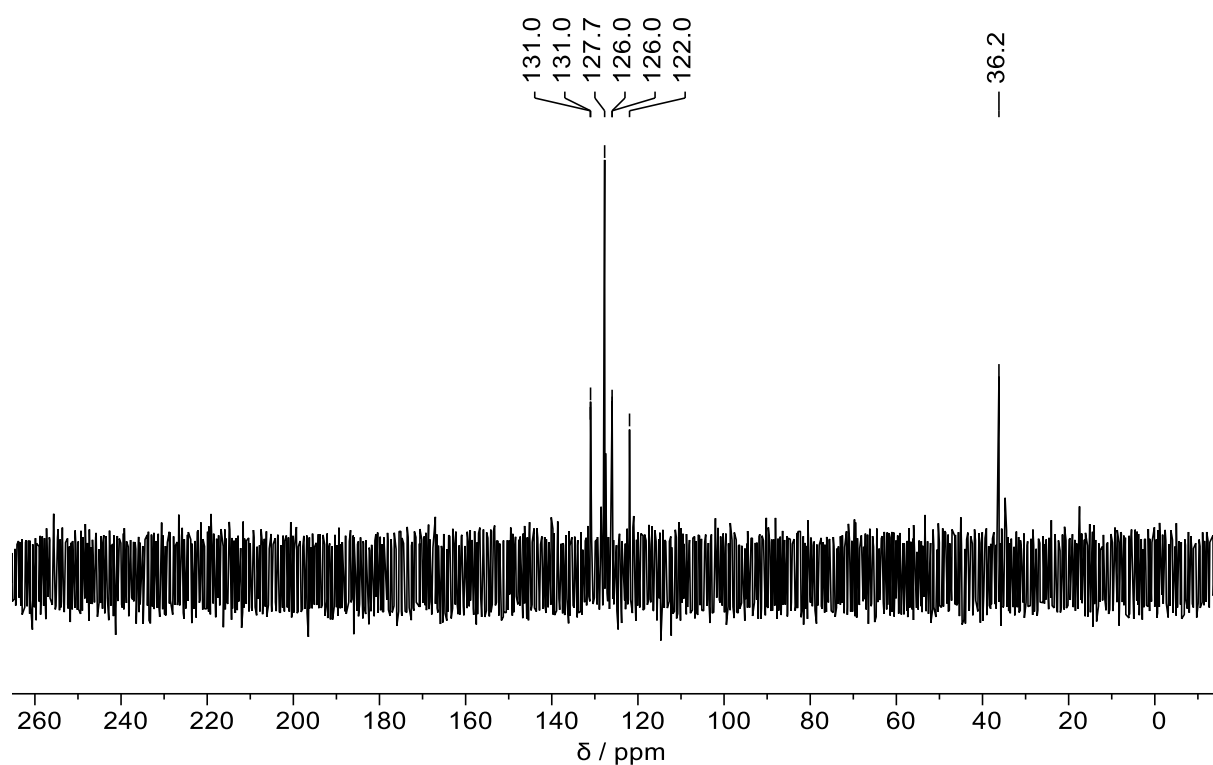

**Fig. S5**  $^{13}\text{C}\{^1\text{H}\}$  DEPT135 NMR spectrum (100.63 MHz,  $\text{CD}_2\text{Cl}_2$ , 298 K) of compound **5**.

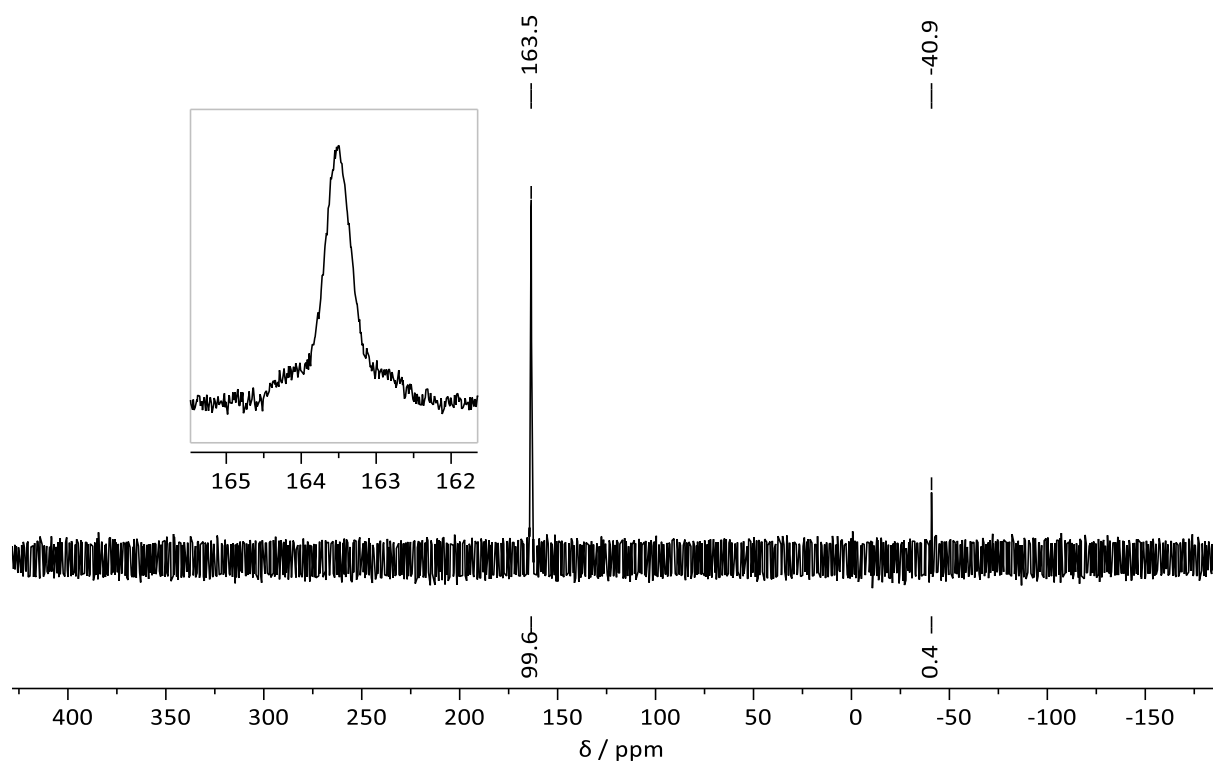

**Fig. S6**  $^{31}\text{P}\{^1\text{H}\}$  NMR spectrum (162.00 MHz,  $\text{CD}_2\text{Cl}_2$ , 298 K) of compound **5**.

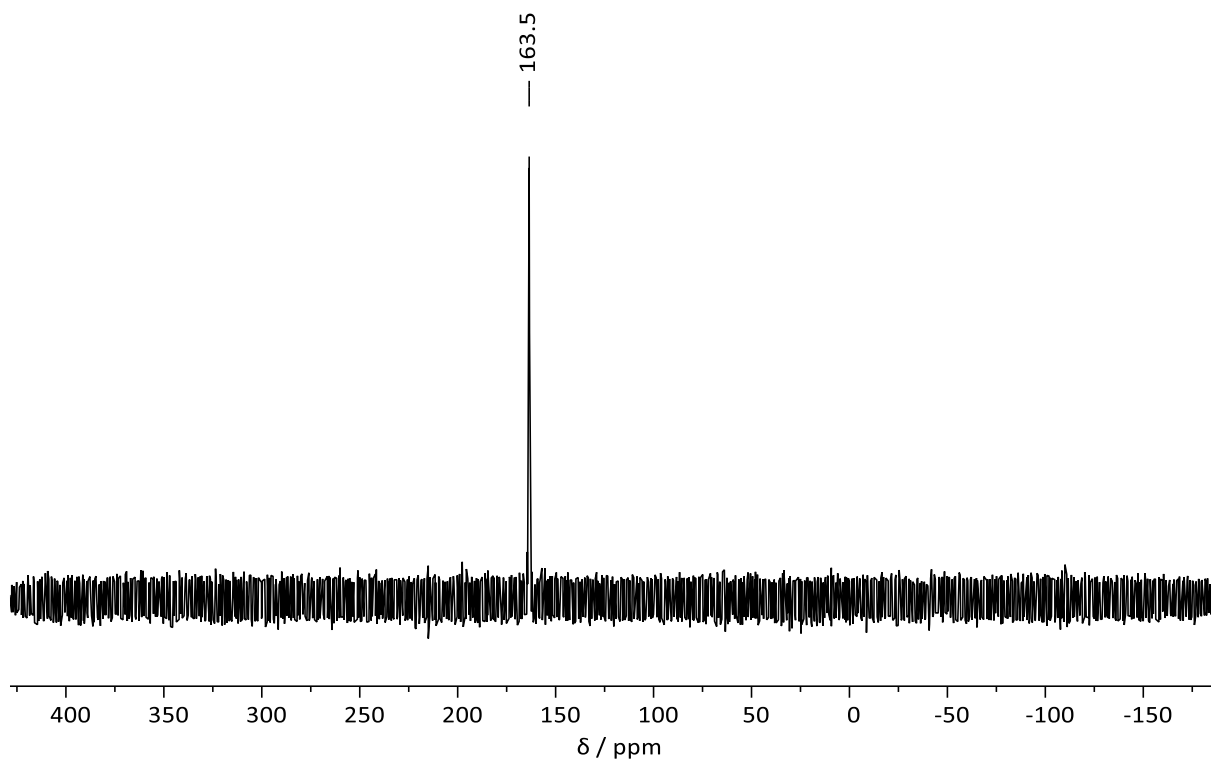

**Fig. S7**  $^{31}\text{P}$  NMR spectrum (162.00 MHz,  $\text{CD}_2\text{Cl}_2$ , 298 K) of compound **5**.

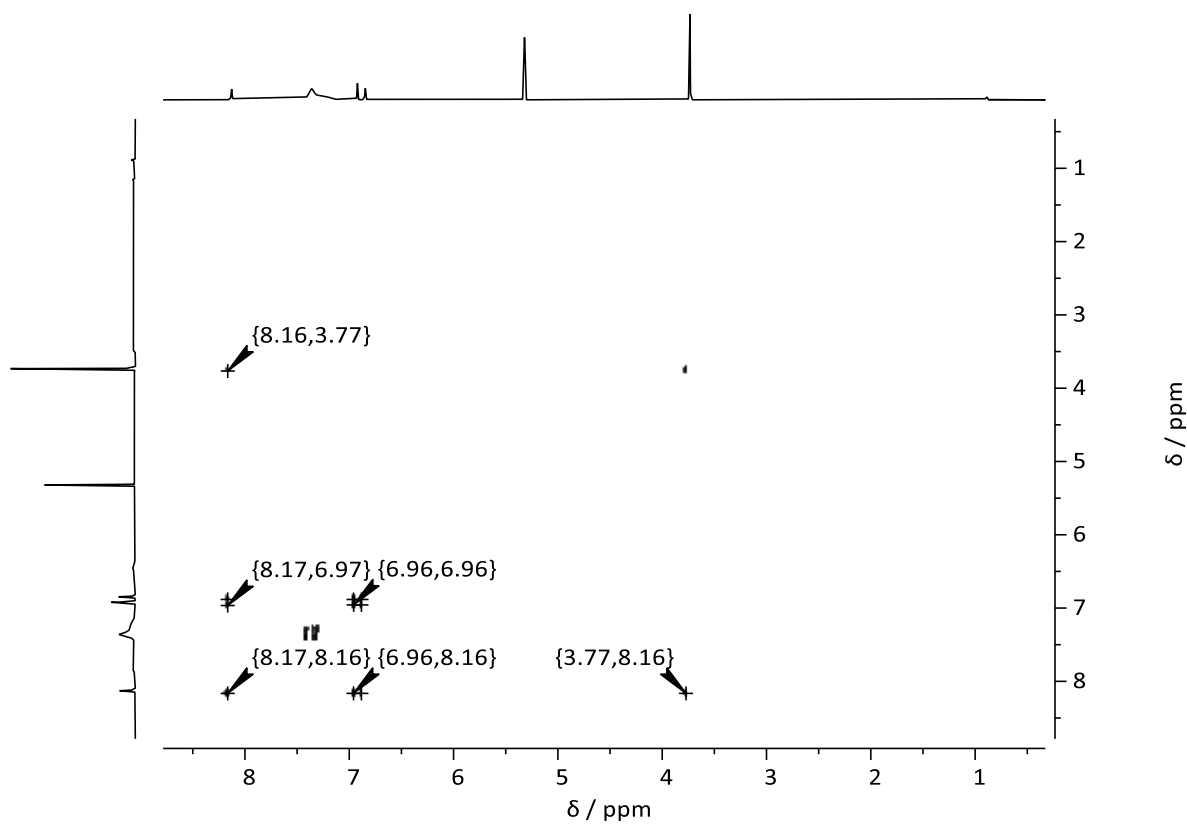

**Fig. S8**  $^1\text{H}$ ,  $^1\text{H}$  COSY NMR spectrum (400.13 MHz, 400.13 MHz,  $\text{CD}_2\text{Cl}_2$ , 298 K) of compound **5**.

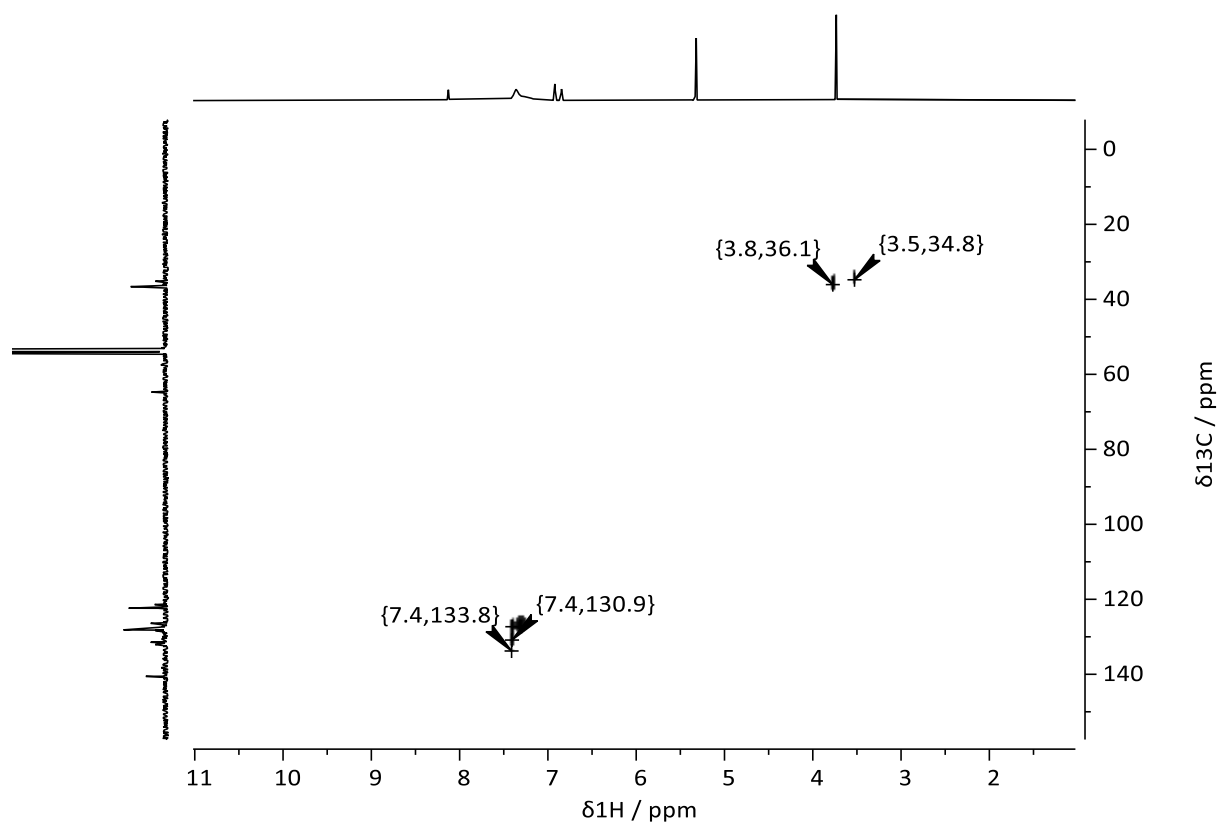

**Fig. S9**  $^1\text{H}$ ,  $^{13}\text{C}$  HSQC NMR spectrum (400.13 MHz, 100.62 MHz,  $\text{CD}_2\text{Cl}_2$ , 298 K) of compound **5**.

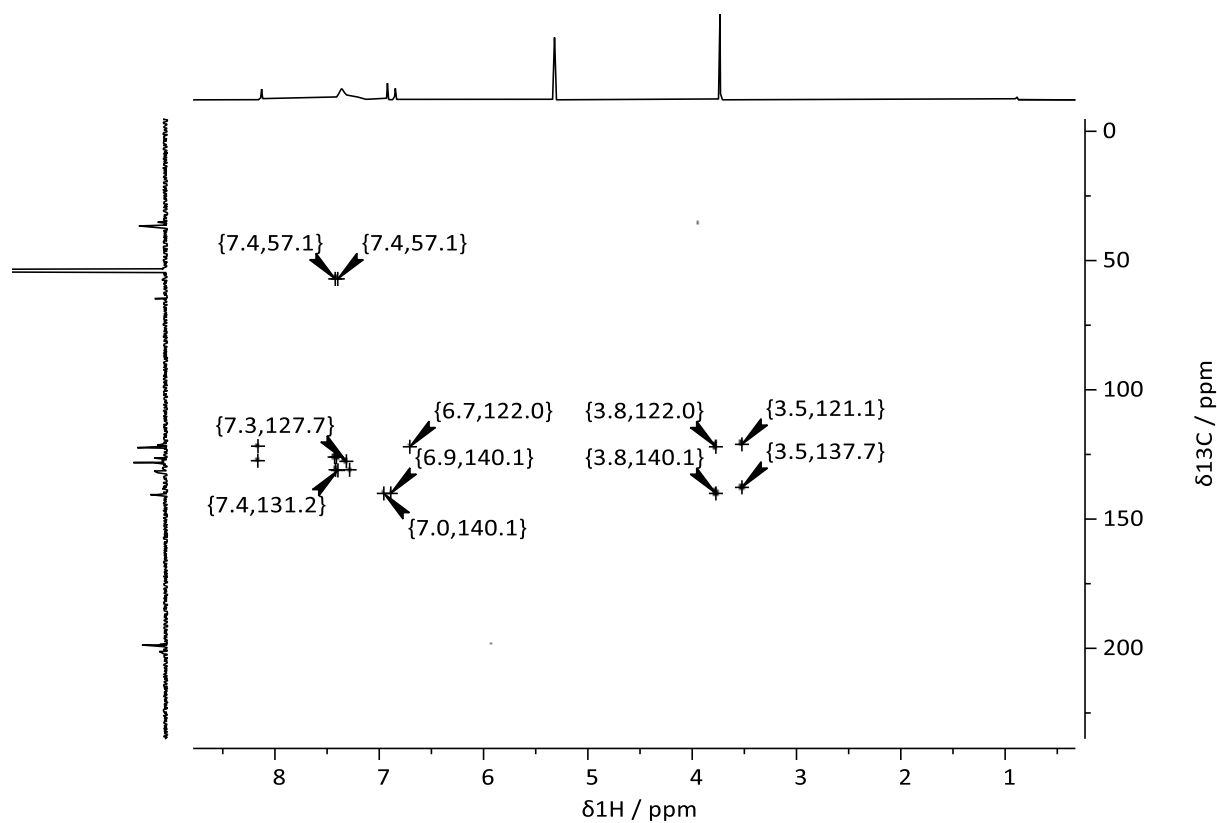

**Fig. S10**  $^1\text{H}$ ,  $^{13}\text{C}$  HMBC NMR spectrum (400.13 MHz, 100.62 MHz,  $\text{CD}_2\text{Cl}_2$ , 298 K) of compound **5**.

### Compound 6

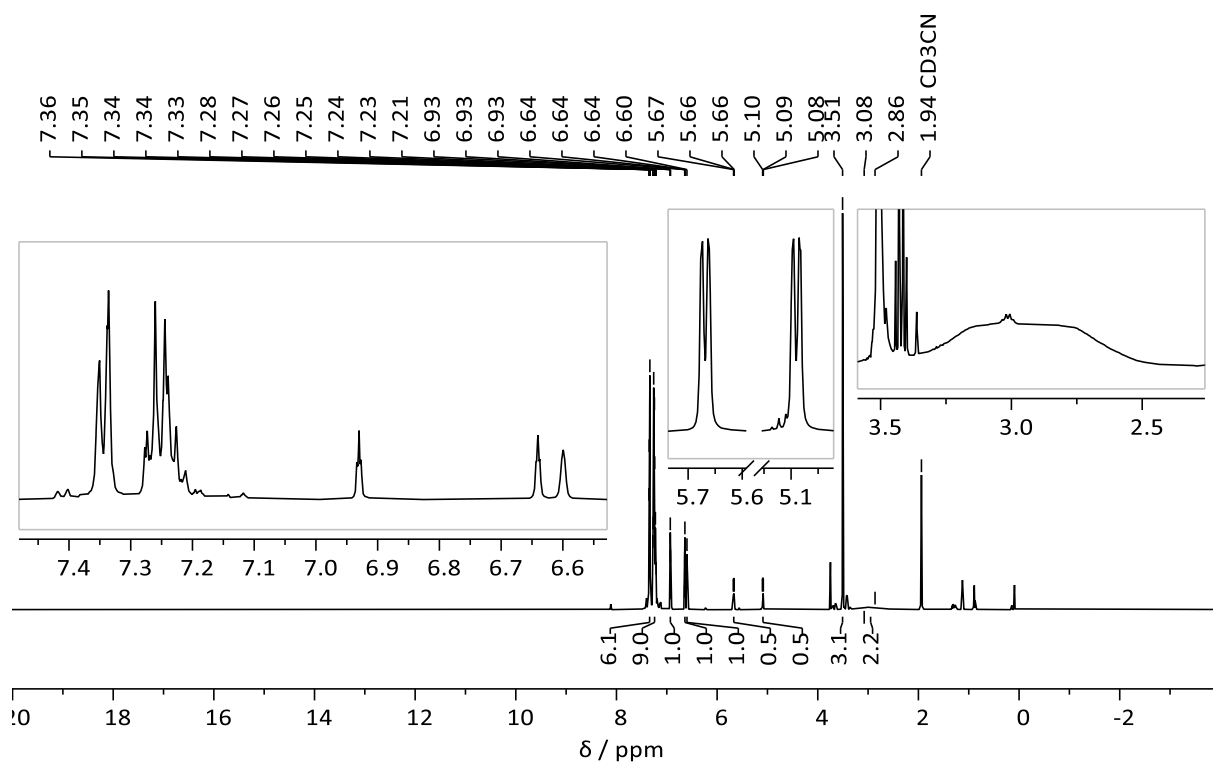

Fig. S11 <sup>1</sup>H NMR spectrum (500.04 MHz, CD<sub>3</sub>CN, 298 K) of compound 6.

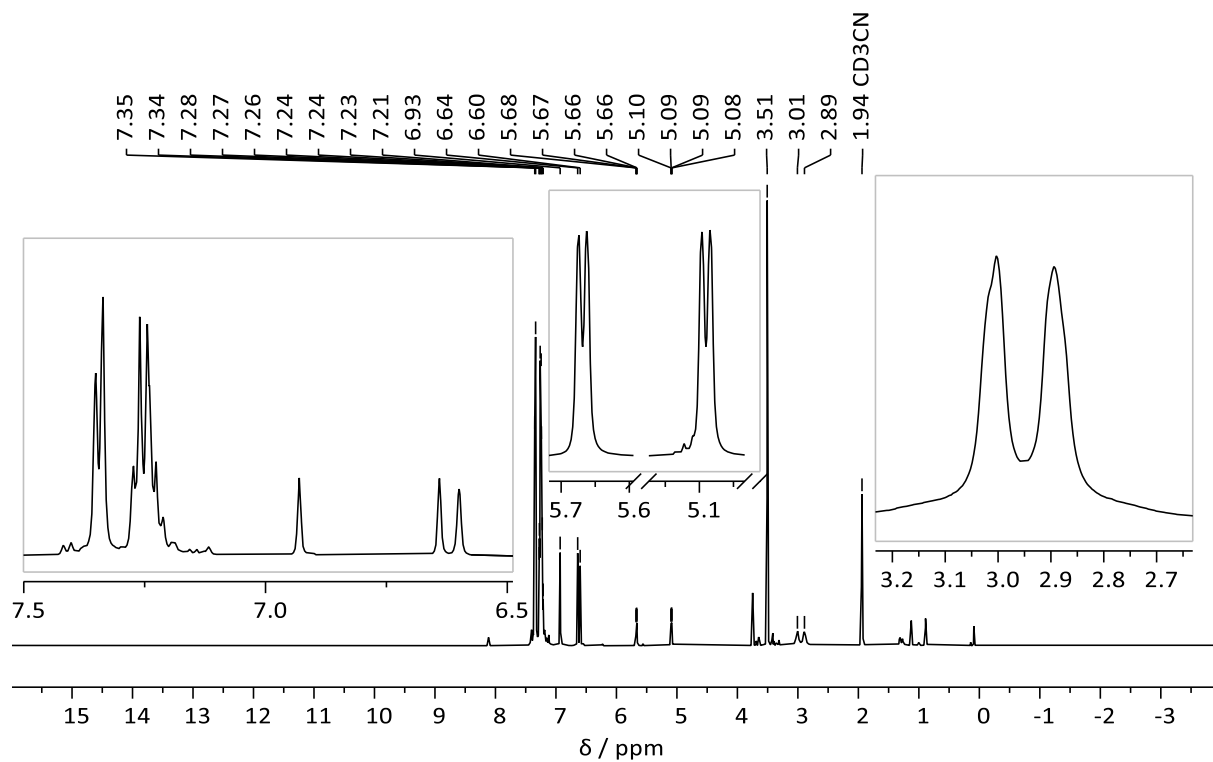

Fig. S12 <sup>1</sup>H{<sup>11</sup>B} NMR spectrum (500.04 MHz, CD<sub>3</sub>CN, 298 K) of compound 6.

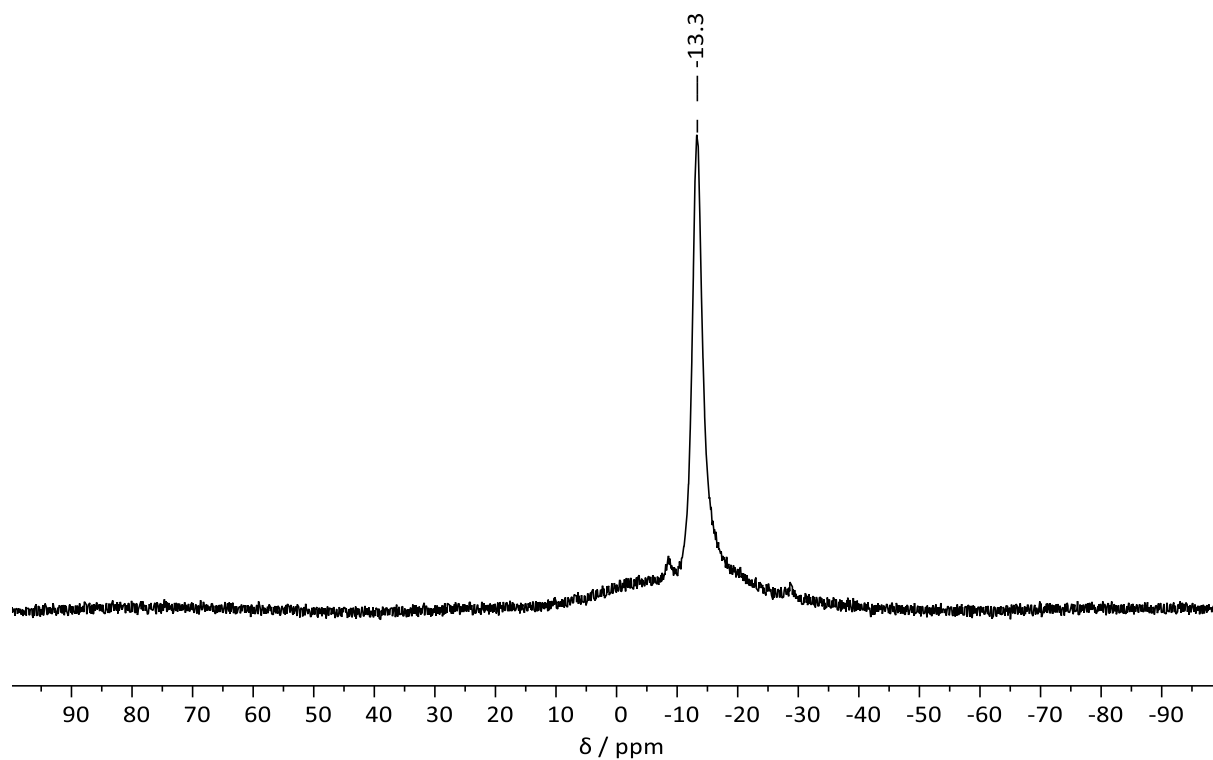

**Fig. S13**  $^{11}\text{B}\{^1\text{H}\}$  NMR spectrum (128.38 MHz,  $\text{THF-}d_8$ , 298 K) of compound 6.

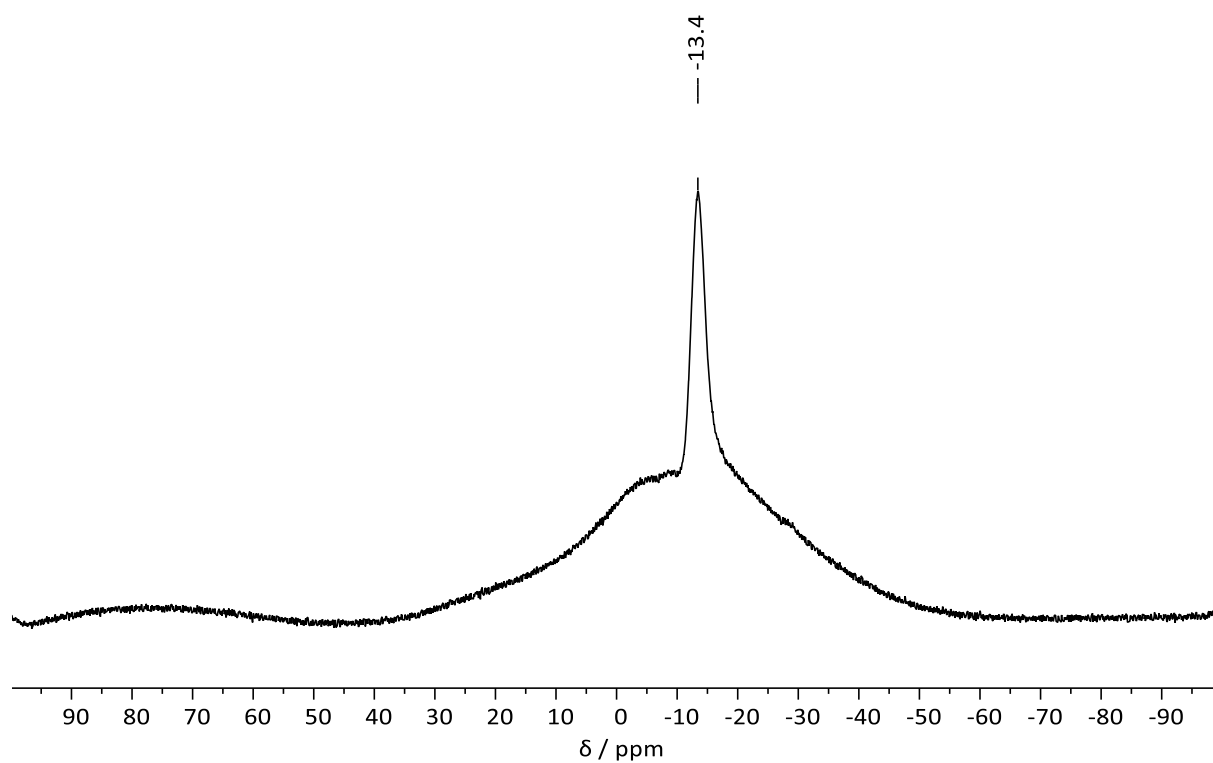

**Fig. S14**  $^{11}\text{B}$  NMR spectrum (128.38 MHz,  $\text{THF-}d_8$ , 298 K) of compound 6.

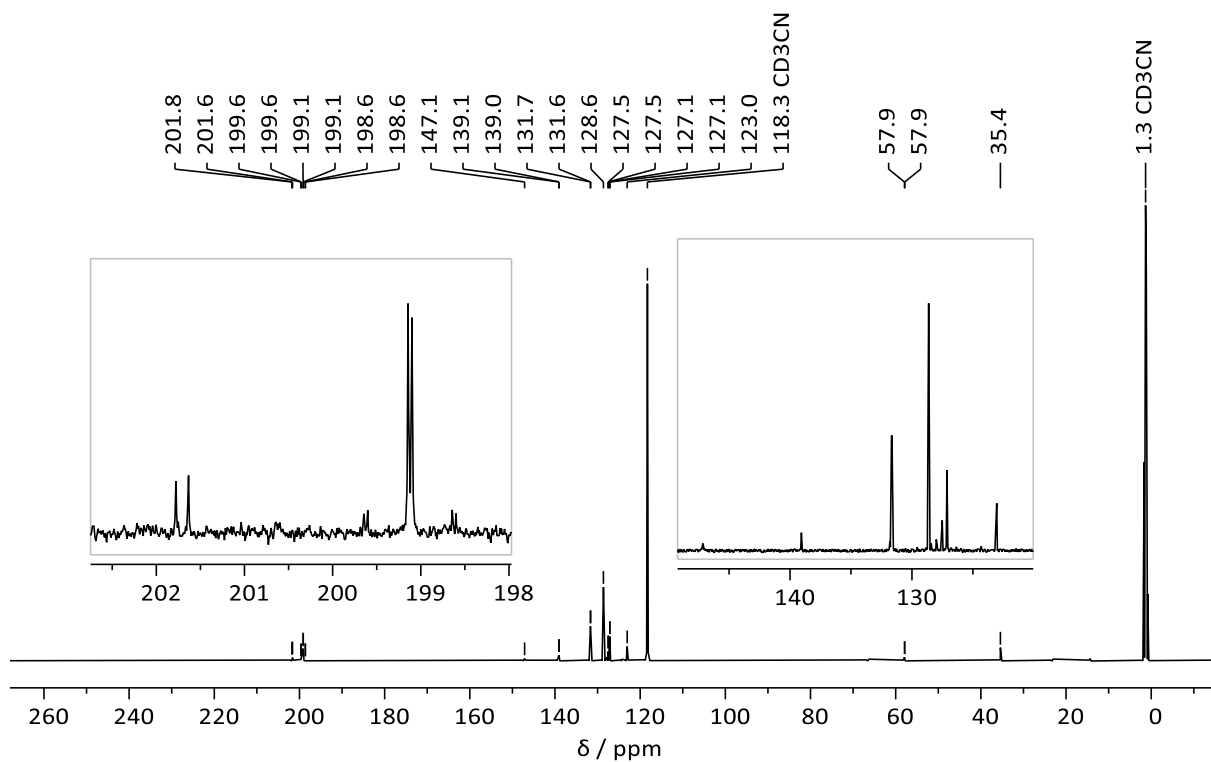

**Fig. S15**  $^{13}\text{C}\{^1\text{H}\}$  NMR spectrum (125.75 MHz,  $\text{CD}_3\text{CN}$ , 298 K) of compound **6**.

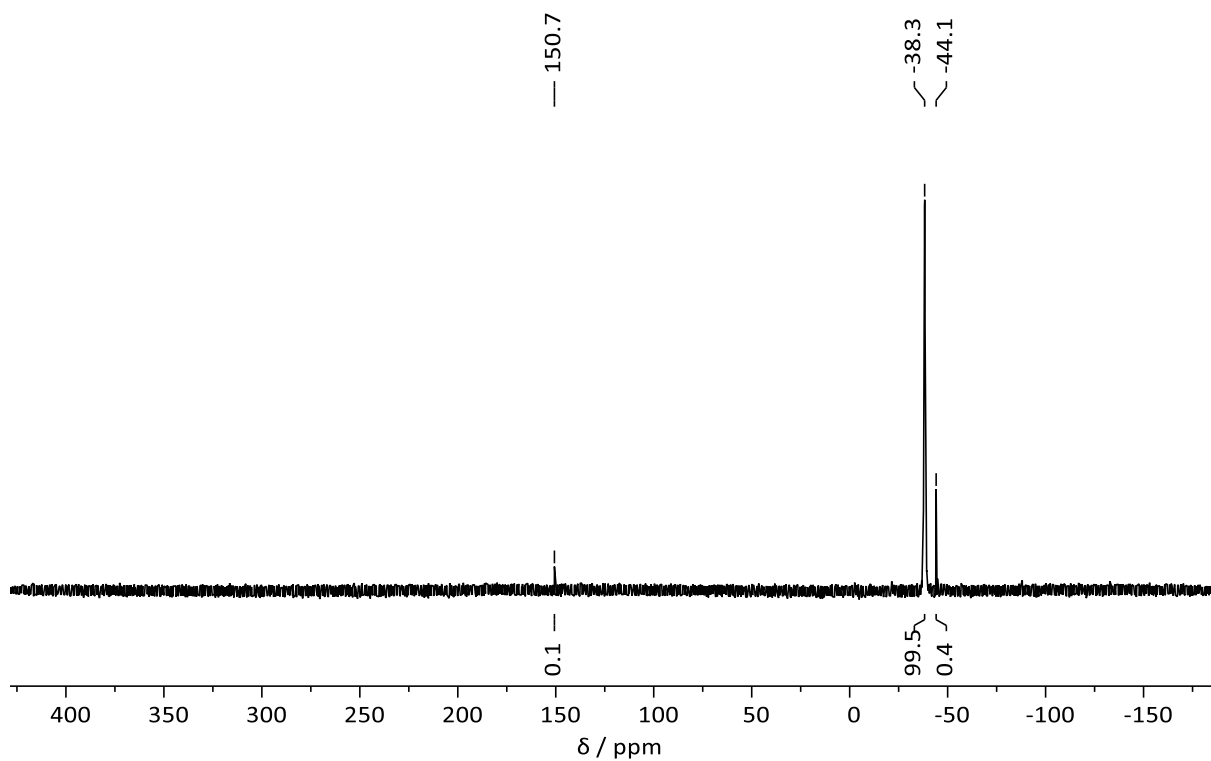

**Fig. S16**  $^{31}\text{P}\{^1\text{H}\}$  NMR spectrum (162.00 MHz,  $\text{THF-}d_8$ , 298 K) of compound **6**.

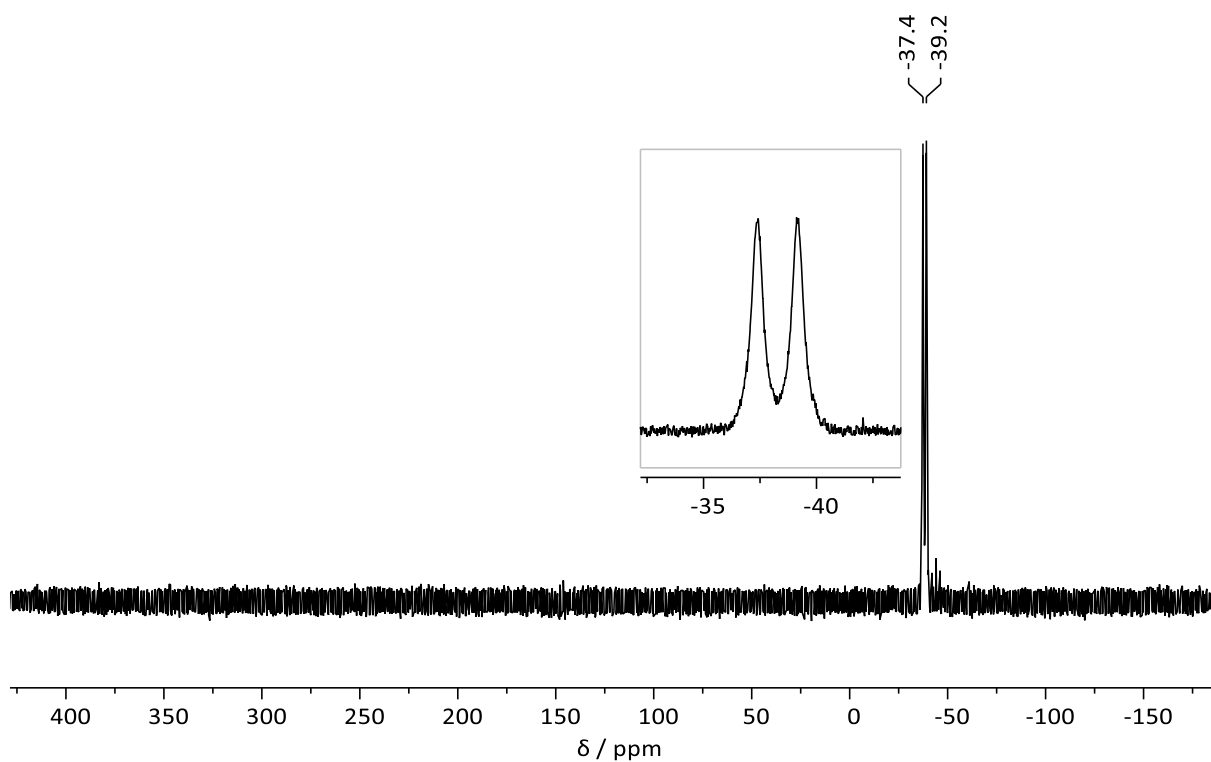

**Fig. S17** <sup>31</sup>P NMR spectrum (162.00 MHz, THF-*d*<sub>8</sub>, 298 K) of compound 6.

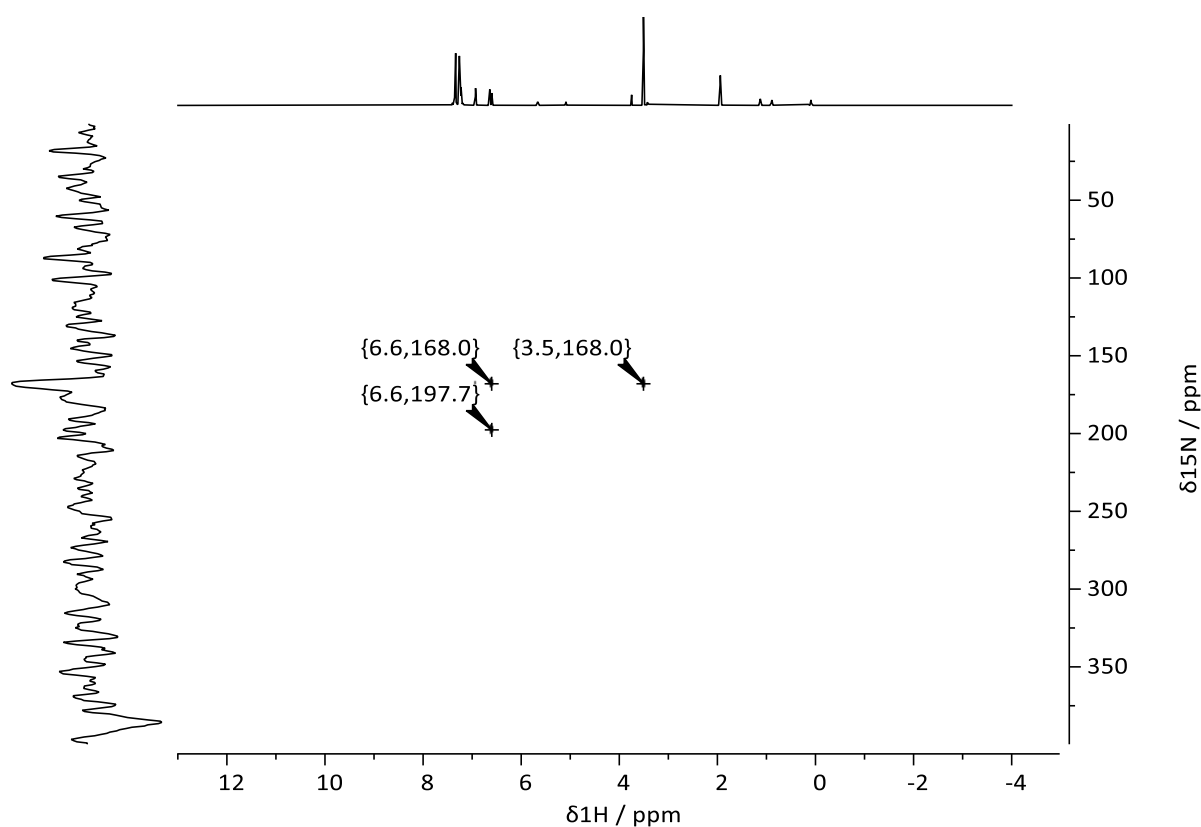

**Fig. S18** <sup>1</sup>H, <sup>15</sup>N HMBC NMR spectrum (500.04 MHz, 50.68 MHz, CD<sub>3</sub>CN, 298 K) of compound 6.



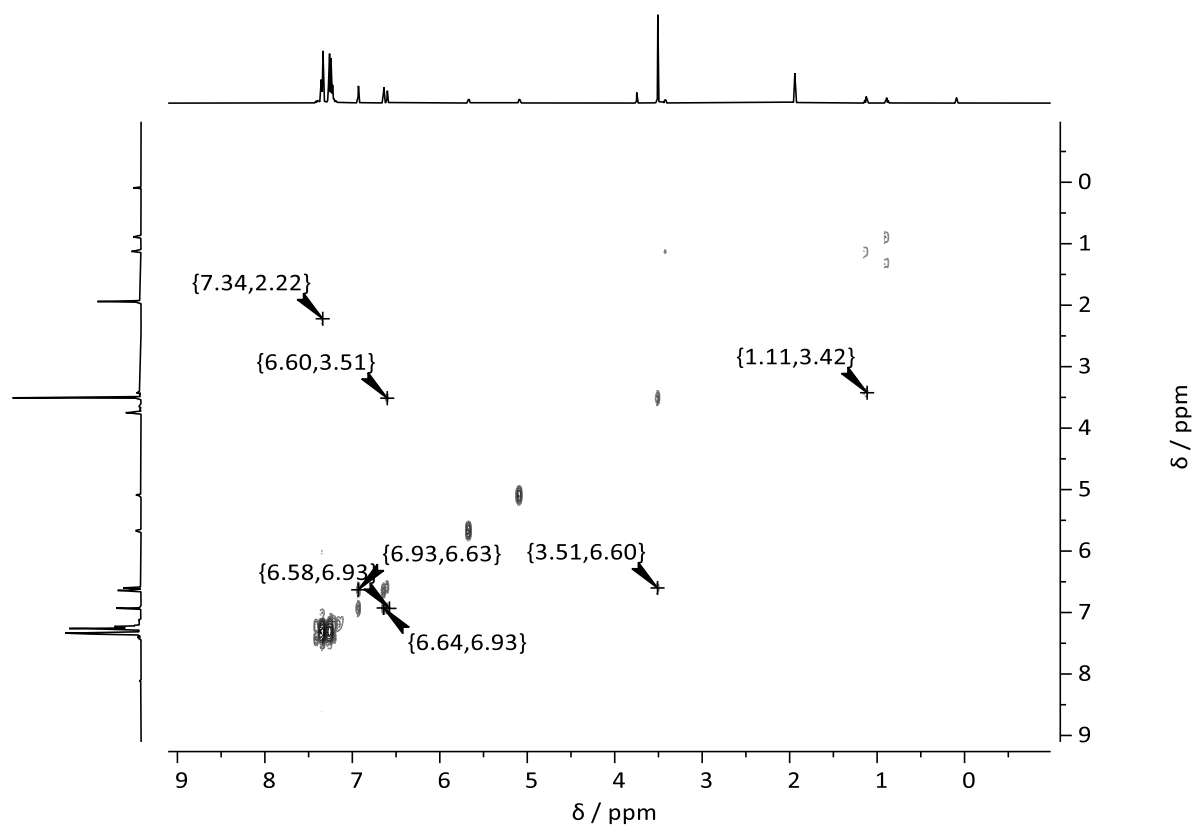

**Fig. S19**  $^1\text{H}$ ,  $^1\text{H}$  COSY NMR spectrum (500.04 MHz, 500.04 MHz,  $\text{CD}_3\text{CN}$ , 298 K) of compound 6.

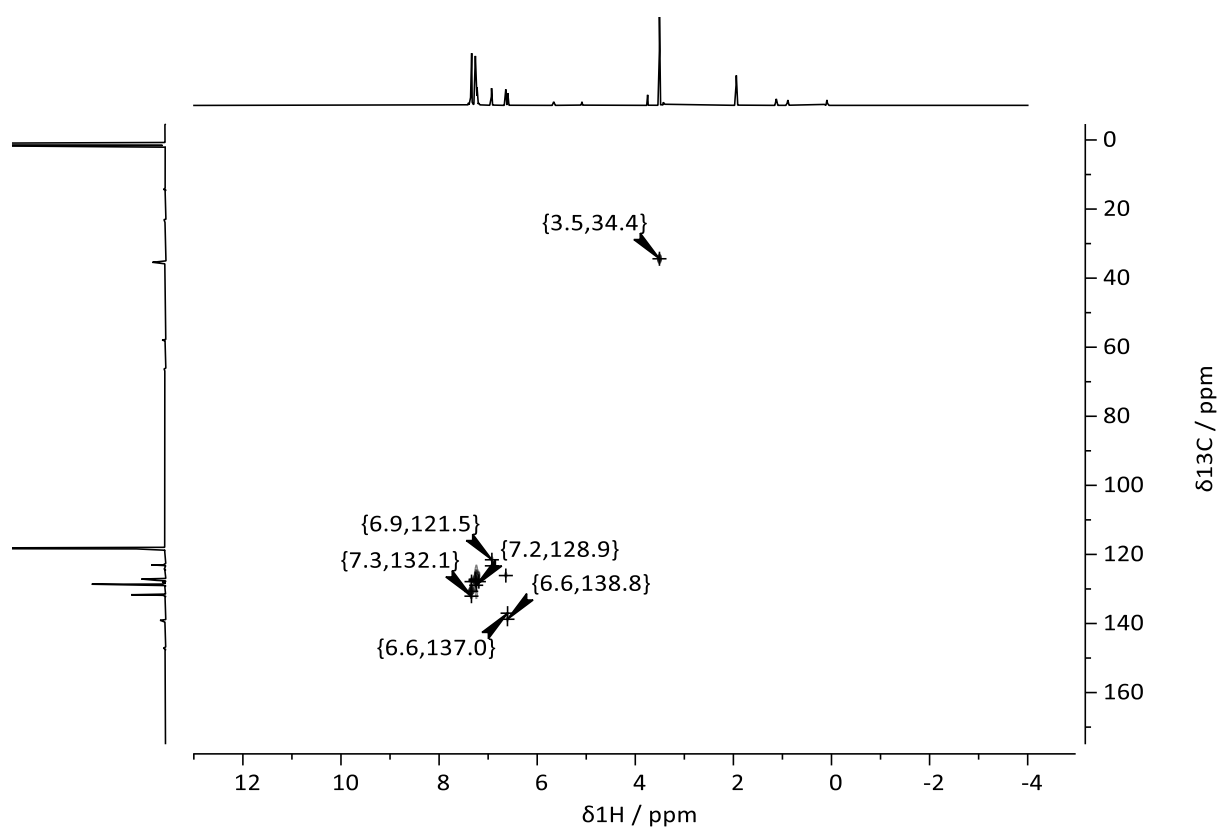

**Fig. S20**  $^1\text{H}$ ,  $^{13}\text{C}$  HSQC NMR spectrum (500.04 MHz, 125.75 MHz,  $\text{CD}_3\text{CN}$ , 298 K) of compound 6.

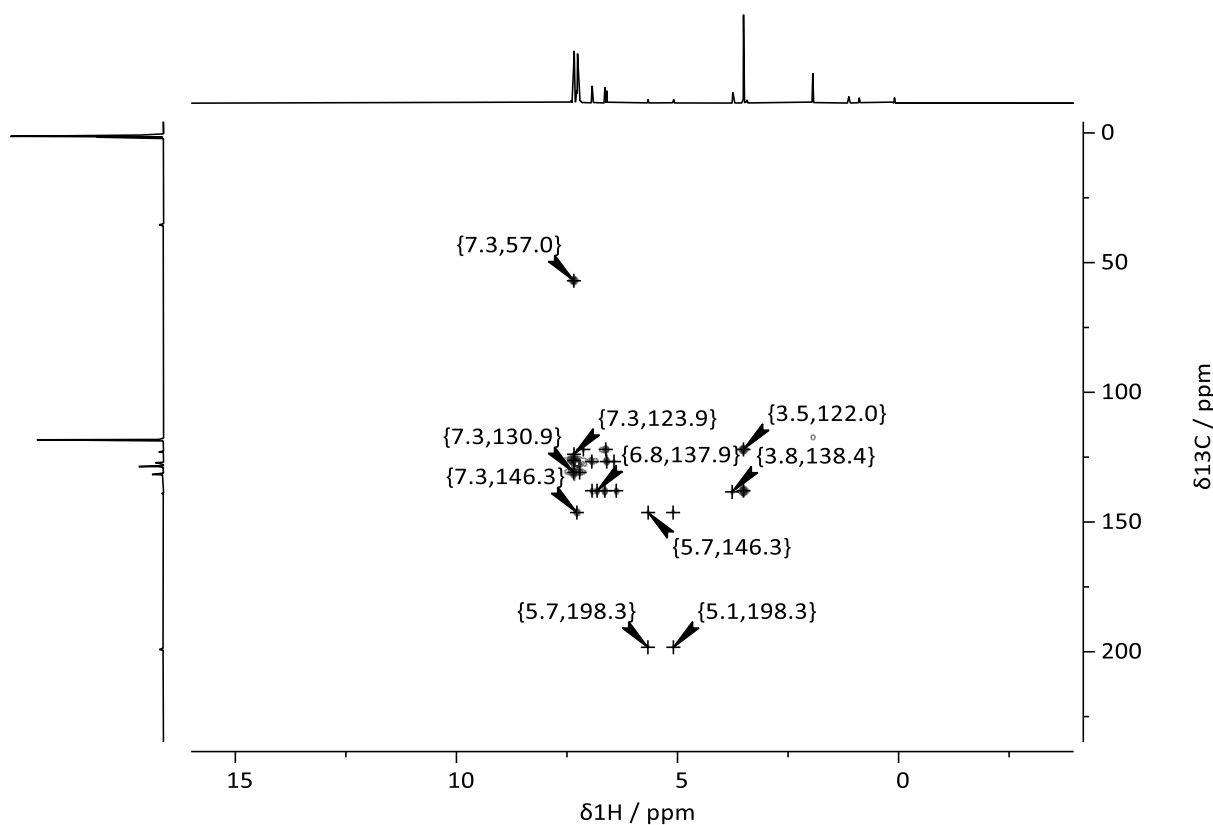

**Fig. S21**  $^1\text{H}$ ,  $^{13}\text{C}$  HMBC NMR spectrum (500.04 MHz, 125.75 MHz,  $\text{CD}_3\text{CN}$ , 298 K) of compound **6**.

**Reaction mixture of compound 1 with  $[\text{W}(\text{CO})_5(\text{NCMe})]$  to obtain compound 3**

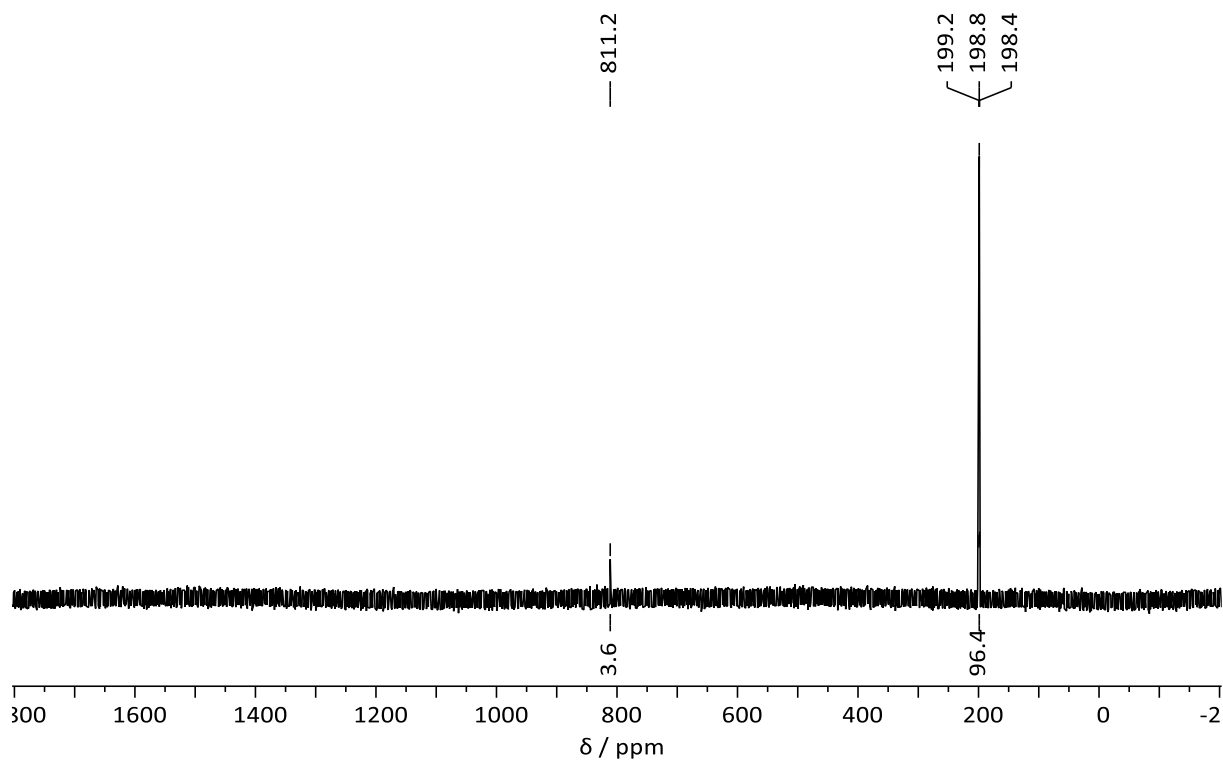

**Fig. S22**  $^{31}\text{P}\{^1\text{H}\}$  NMR spectrum (121.59 MHz,  $\text{C}_6\text{D}_6$ , 298 K) of the reaction mixture of compound **1** with  $[\text{W}(\text{CO})_5(\text{NCMe})]$  containing compound **3** after 6 h.

Reaction mixture of compound **1** with  $[\text{W}(\text{CO})_5(\text{thf})]$  to obtain compound **3**

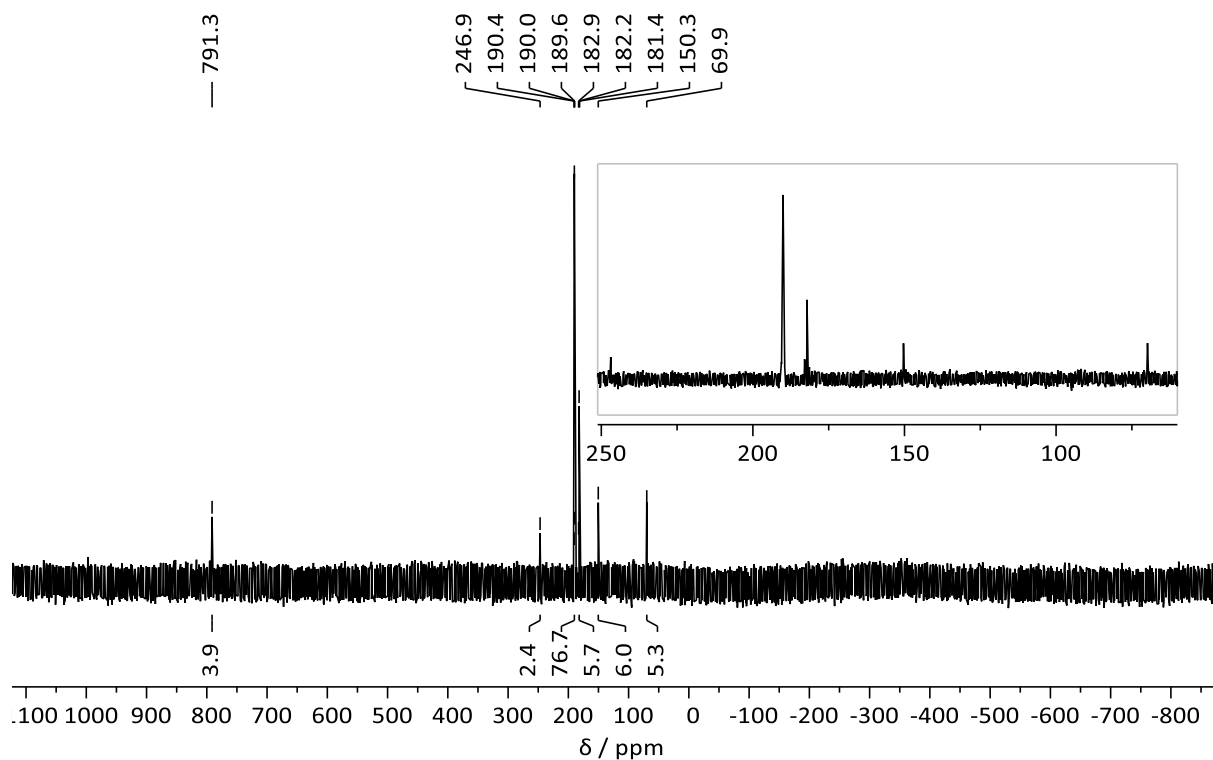

**Fig. S23**  $^{31}\text{P}\{^1\text{H}\}$  NMR spectrum (121.51 MHz, THF, 298 K) of the reaction mixture of compound **1** with  $[\text{W}(\text{CO})_5(\text{thf})]$  containing compound **3** after 3.5 h.

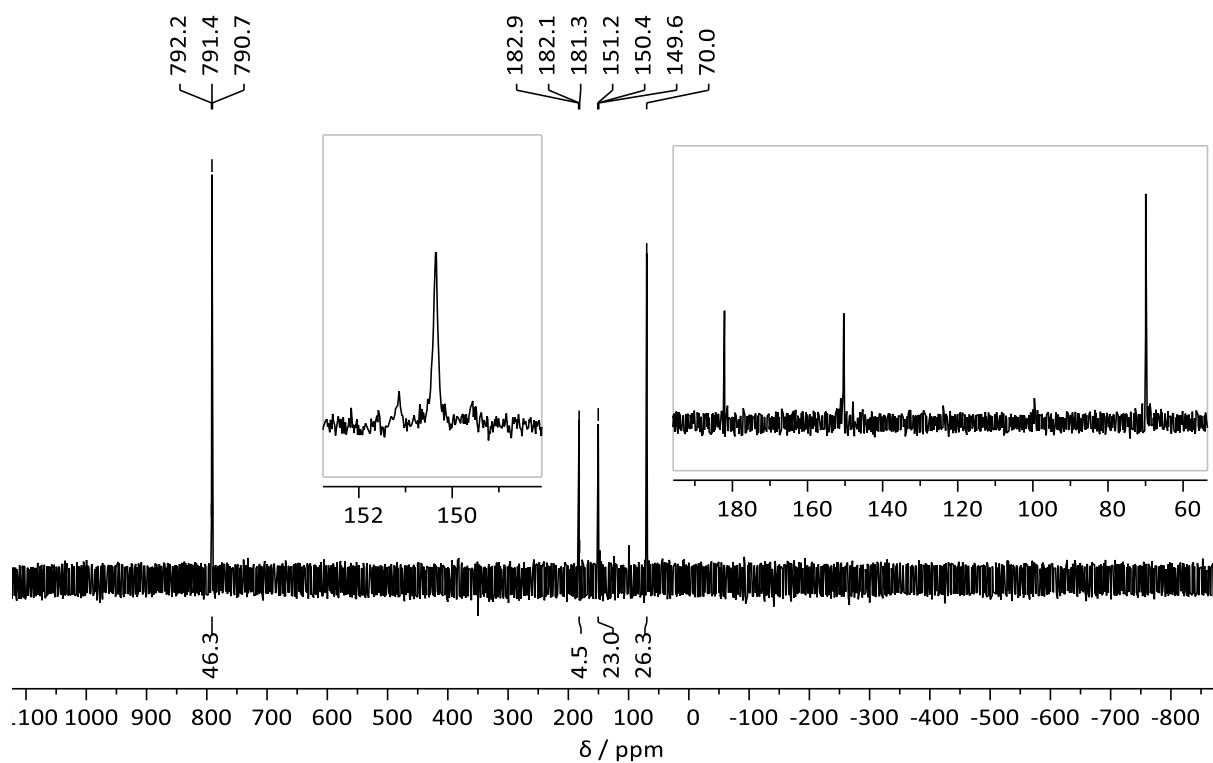

**Fig. S24**  $^{31}\text{P}\{^1\text{H}\}$  NMR spectrum (121.51 MHz, THF, 298 K) of the reaction mixture of compound **1** with  $[\text{W}(\text{CO})_5(\text{thf})]$  containing compound **3** after 6.5 h.

Reaction mixture of compound **1** with  $B(C_6F_5)_3$  to obtain compound **4**

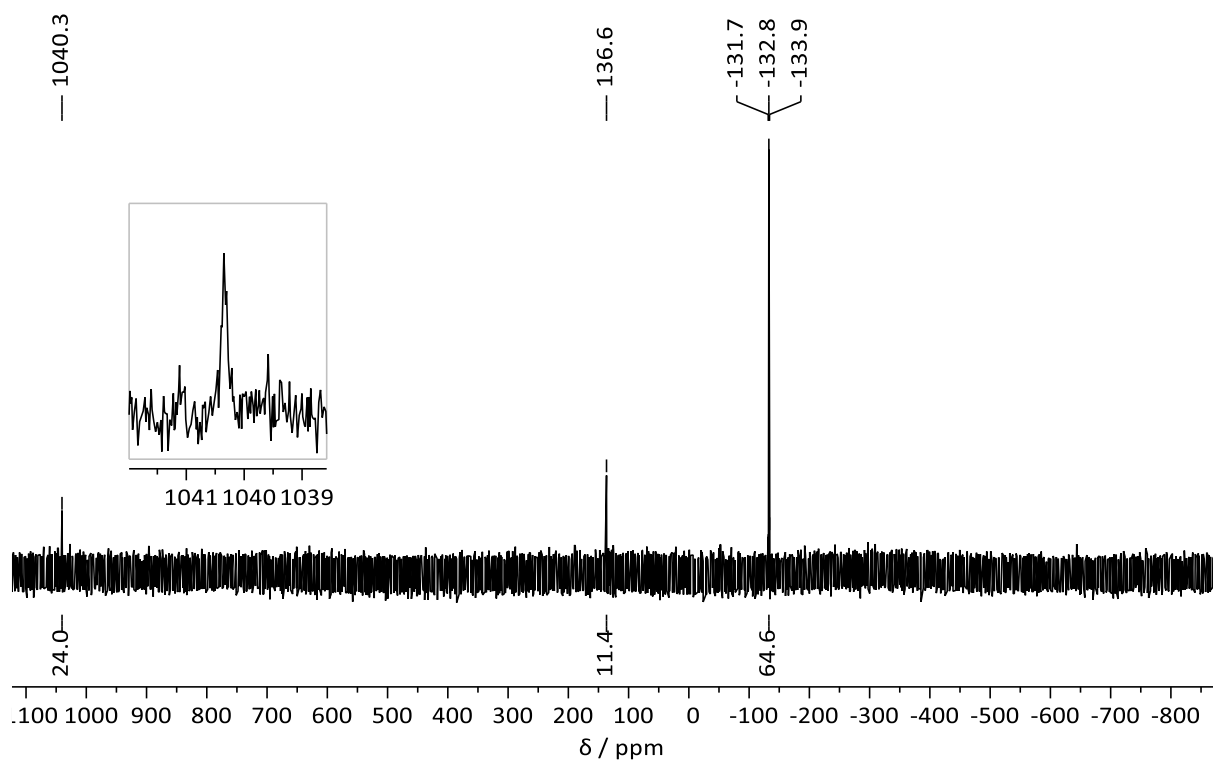

**Fig. S25**  $^{31}P\{^1H\}$  NMR spectrum (121.57 MHz,  $C_6D_6$ , 298 K) of the reaction mixture of compound **1** with  $B(C_6F_5)_3$  containing compound **4** after 6.5 h.

#### 4 *in situ* UV/vis spectra

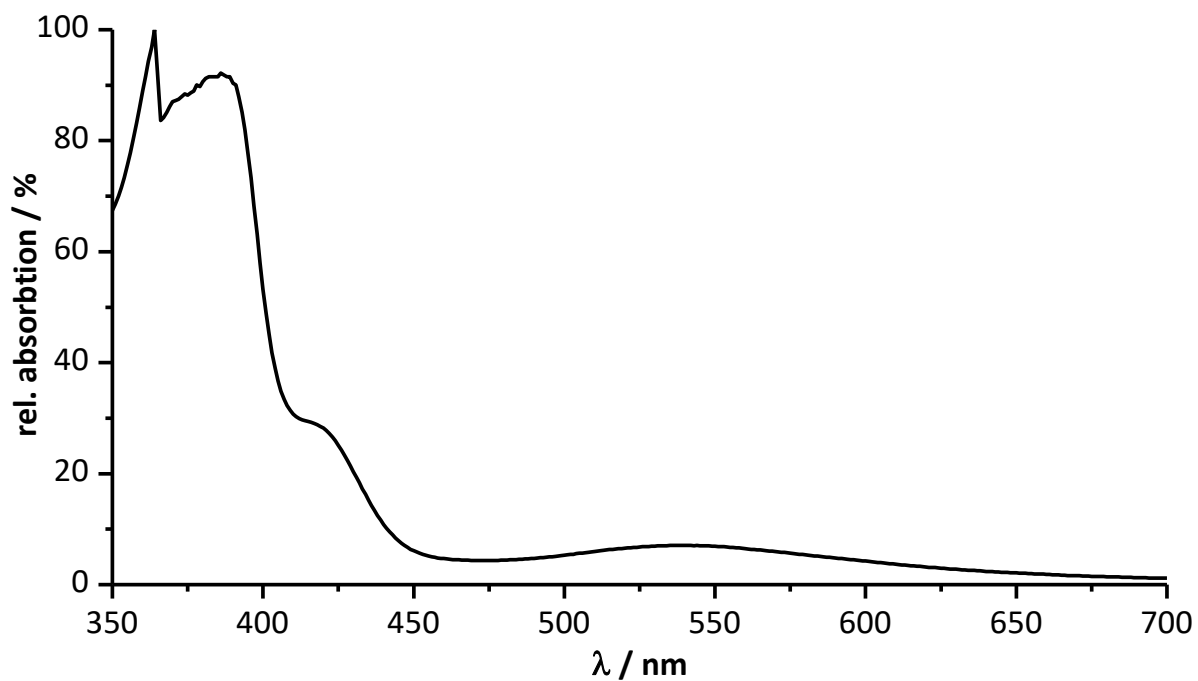

**Fig. S26** *in situ* UV/vis spectrum of the reaction mixture of compound **1** with [W(CO)<sub>5</sub>(NCMe)] in THF after stirring for 4 h at ambient temperature with a normalized absorption scale.

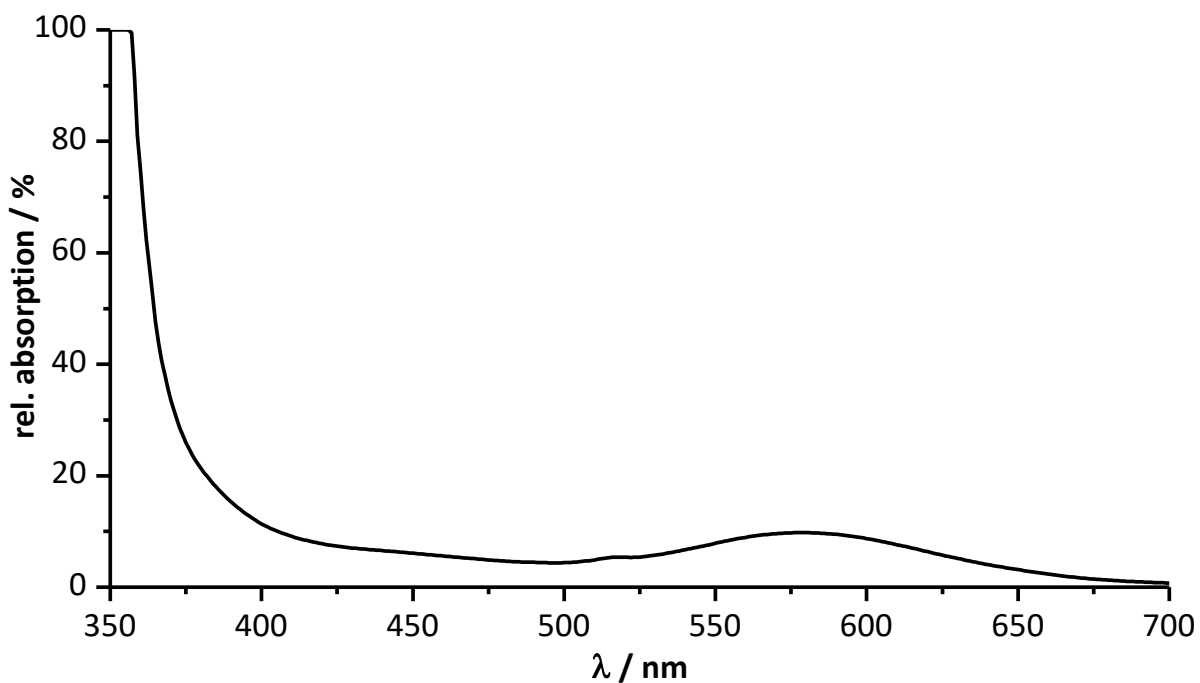

**Fig. S27** *in situ* UV/vis spectrum of the reaction mixture of compound **1** with B(C<sub>6</sub>F<sub>5</sub>)<sub>3</sub> in benzene after stirring for 30 minutes at ambient temperature with a normalized absorption scale.

## 5 X-ray diffraction studies

### Compound 5

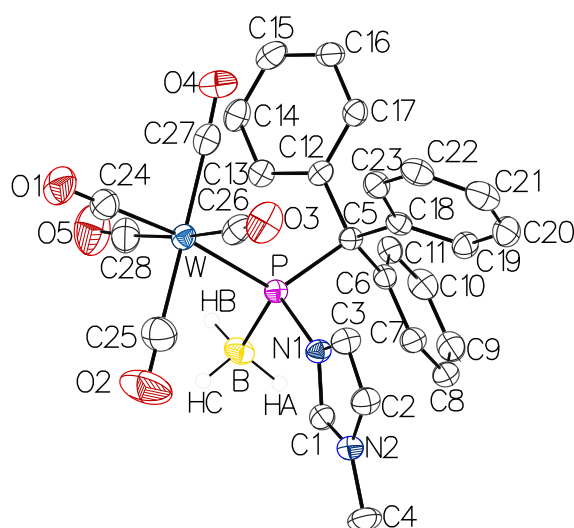

**Fig. S28** Molecular structures of **5** in the single crystal lattice at 100(2) K. Thermal ellipsoids are set at 50% probability level. Solvent molecules and hydrogen atoms were omitted for clarity except for those bound to boron atoms. Suitable single crystals were obtained as clear colourless blocks by cooling a concentrated solution of **5** in  $\text{CD}_2\text{Cl}_2$  at  $-30\text{ }^\circ\text{C}$ . CCDC 2320467.

**Table S1** Crystal data and structure refinements for **5**.

|                                      |                                                                                             |
|--------------------------------------|---------------------------------------------------------------------------------------------|
| Identification code                  | GSTR793, DB-630 // GXraymo_7114_om_4                                                        |
| Crystal habitus                      | clear colourless block                                                                      |
| Device type                          | Bruker D8 Venture                                                                           |
| Empirical formula                    | $\text{C}_{30}\text{H}_{28}\text{BCl}_4\text{N}_2\text{O}_5\text{PW}$                       |
| Moiety formula                       | $\text{C}_{28}\text{H}_{24}\text{BN}_2\text{O}_5\text{PW}$ , 2 ( $\text{CH}_2\text{Cl}_2$ ) |
| Formula weight / g/mol               | 863.97                                                                                      |
| $T / \text{K}$                       | 100.0                                                                                       |
| Crystal system                       | triclinic                                                                                   |
| Space group                          | $P\bar{1}$                                                                                  |
| $a / \text{Å}$                       | 11.0075(6)                                                                                  |
| $b / \text{Å}$                       | 12.3330(7)                                                                                  |
| $c / \text{Å}$                       | 12.9754(7)                                                                                  |
| $\alpha / ^\circ$                    | 85.521(2)                                                                                   |
| $\beta / ^\circ$                     | 73.945(2)                                                                                   |
| $\gamma / ^\circ$                    | 81.084(2)                                                                                   |
| $V / \text{Å}^3$                     | 1671.17(16)                                                                                 |
| $Z$                                  | 2                                                                                           |
| $\rho_{\text{calc}} / \text{g/cm}^3$ | 1.717                                                                                       |
| $\mu / \text{mm}^{-1}$               | 3.865                                                                                       |
| $F(000)$                             | 848.0                                                                                       |
| Crystal size / $\text{mm}^3$         | $0.6 \times 0.48 \times 0.44$                                                               |
| Absorption correction                | empirical                                                                                   |
| Min. and max. transmission           | 0.338087 and 0.746427                                                                       |

|                                                |                                                                  |
|------------------------------------------------|------------------------------------------------------------------|
| Radiation                                      | Mo-K $\alpha$ ( $\lambda = 0.71073$ Å)                           |
| 2 $\theta$ range for data collection / °       | 5.884 to 58.498                                                  |
| Completeness to $\theta$                       | 0.995                                                            |
| Index ranges                                   | $-14 \leq h \leq 15$ , $-16 \leq k \leq 16$ , $0 \leq l \leq 17$ |
| Reflections collected                          | 9067                                                             |
| Independent reflections                        | 9067 ( $R_{int} = 0.0618$ , $R_{\sigma} = 0.0252$ )              |
| Data / restraints / parameters                 | 9067 / 3 / 411                                                   |
| Goodness-of-fit on $F^2$                       | 1.111                                                            |
| Final $R$ indexes ( $I \geq 2\sigma(I)$ )      | $R_1 = 0.0199$ , $\omega R_2 = 0.0471$                           |
| Final $R$ indexes (all data)                   | $R_1 = 0.0219$ , $\omega R_2 = 0.0483$                           |
| Largest diff. peak and hole / e/Å <sup>3</sup> | 1.10 and -0.77                                                   |

**Table S2** Bond lengths for 5.

| Atom | Atom | Length / Å | Atom | Atom | Length / Å |
|------|------|------------|------|------|------------|
| W    | P    | 2.5688(5)  | C6   | C7   | 1.405(3)   |
| W    | C24  | 1.994(2)   | C6   | C11  | 1.398(3)   |
| W    | C25  | 2.059(2)   | C7   | C8   | 1.391(3)   |
| W    | C26  | 2.033(2)   | C8   | C9   | 1.391(3)   |
| W    | C27  | 2.046(2)   | C9   | C10  | 1.386(3)   |
| W    | C28  | 2.063(2)   | C10  | C11  | 1.396(3)   |
| P    | N1   | 1.8138(16) | C12  | C13  | 1.400(3)   |
| P    | C5   | 1.9540(19) | C12  | C17  | 1.400(3)   |
| P    | B    | 1.959(2)   | C13  | C14  | 1.391(3)   |
| O1   | C24  | 1.148(3)   | C14  | C15  | 1.391(3)   |
| O2   | C25  | 1.133(3)   | C15  | C16  | 1.383(3)   |
| O3   | C26  | 1.141(3)   | C16  | C17  | 1.395(3)   |
| O4   | C27  | 1.137(3)   | C18  | C19  | 1.395(3)   |
| O5   | C28  | 1.138(3)   | C18  | C23  | 1.406(3)   |
| N1   | C1   | 1.346(2)   | C19  | C20  | 1.399(3)   |
| N1   | C3   | 1.389(2)   | C20  | C21  | 1.383(3)   |
| N2   | C1   | 1.324(3)   | C21  | C22  | 1.391(3)   |
| N2   | C2   | 1.384(3)   | C22  | C23  | 1.386(3)   |
| N2   | C4   | 1.466(2)   | Cl1  | C29  | 1.757(3)   |
| C2   | C3   | 1.357(3)   | Cl2  | C29  | 1.754(3)   |
| C5   | C6   | 1.540(3)   | Cl3  | C30  | 1.764(2)   |
| C5   | C12  | 1.540(2)   | Cl4  | C30  | 1.754(2)   |
| C5   | C18  | 1.540(3)   |      |      |            |

**Table S3** Bond angles for **5**.

| Atom | Atom | Atom | Angle / °  | Atom | Atom | Atom | Angle / °  |
|------|------|------|------------|------|------|------|------------|
| C24  | W    | P    | 172.79(6)  | C18  | C5   | C6   | 112.55(15) |
| C24  | W    | C25  | 90.24(9)   | C18  | C5   | C12  | 110.02(14) |
| C24  | W    | C26  | 87.53(9)   | C7   | C6   | C5   | 120.86(16) |
| C24  | W    | C27  | 88.09(8)   | C11  | C6   | C5   | 121.89(16) |
| C24  | W    | C28  | 88.45(9)   | C11  | C6   | C7   | 117.24(17) |
| C25  | W    | P    | 84.05(7)   | C8   | C7   | C6   | 121.67(18) |
| C25  | W    | C28  | 93.76(10)  | C7   | C8   | C9   | 120.14(18) |
| C26  | W    | P    | 96.87(6)   | C10  | C9   | C8   | 119.12(18) |
| C26  | W    | C25  | 90.24(9)   | C9   | C10  | C11  | 120.68(19) |
| C26  | W    | C27  | 88.41(8)   | C10  | C11  | C6   | 121.14(18) |
| C26  | W    | C28  | 174.34(8)  | C13  | C12  | C5   | 120.91(16) |
| C27  | W    | P    | 97.72(6)   | C17  | C12  | C5   | 120.82(17) |
| C27  | W    | C25  | 177.90(8)  | C17  | C12  | C13  | 117.98(17) |
| C27  | W    | C28  | 87.47(8)   | C14  | C13  | C12  | 121.12(18) |
| C28  | W    | P    | 87.54(6)   | C15  | C14  | C13  | 120.20(19) |
| N1   | P    | W    | 107.17(5)  | C16  | C15  | C14  | 119.34(18) |
| N1   | P    | C5   | 101.73(8)  | C15  | C16  | C17  | 120.70(18) |
| N1   | P    | B    | 100.26(9)  | C16  | C17  | C12  | 120.66(18) |
| C5   | P    | W    | 121.14(6)  | C19  | C18  | C5   | 123.47(17) |
| C5   | P    | B    | 111.77(9)  | C19  | C18  | C23  | 117.15(17) |
| B    | P    | W    | 111.89(7)  | C23  | C18  | C5   | 119.37(17) |
| C1   | N1   | P    | 124.34(13) | C18  | C19  | C20  | 121.19(19) |
| C1   | N1   | C3   | 107.21(16) | C21  | C20  | C19  | 120.6(2)   |
| C3   | N1   | P    | 128.07(13) | C20  | C21  | C22  | 119.02(19) |
| C1   | N2   | C2   | 108.74(16) | C23  | C22  | C21  | 120.33(19) |
| C1   | N2   | C4   | 126.56(17) | C22  | C23  | C18  | 121.58(19) |
| C2   | N2   | C4   | 124.68(17) | O1   | C24  | W    | 178.9(2)   |
| N2   | C1   | N1   | 109.48(17) | O2   | C25  | W    | 178.1(2)   |
| C3   | C2   | N2   | 106.78(17) | O3   | C26  | W    | 176.02(18) |
| C2   | C3   | N1   | 107.79(17) | O4   | C27  | W    | 175.58(17) |
| C6   | C5   | P    | 109.45(12) | O5   | C28  | W    | 175.0(2)   |
| C6   | C5   | C12  | 109.55(14) | Cl2  | C29  | Cl1  | 112.35(14) |
| C12  | C5   | P    | 106.38(12) | Cl4  | C30  | Cl3  | 111.90(13) |
| C18  | C5   | P    | 108.70(12) |      |      |      |            |



**Table S4** Torsion angles for 5.

| A  | B   | C   | D   | Angle / °   | A   | B   | C   | D   | Angle / °   |
|----|-----|-----|-----|-------------|-----|-----|-----|-----|-------------|
| W  | P   | N1  | C1  | 119.77(15)  | C6  | C7  | C8  | C9  | -0.5(3)     |
| W  | P   | N1  | C3  | -52.26(17)  | C7  | C6  | C11 | C10 | -0.5(3)     |
| P  | N1  | C1  | N2  | -173.41(13) | C7  | C8  | C9  | C10 | -0.1(3)     |
| P  | N1  | C3  | C2  | 173.17(14)  | C8  | C9  | C10 | C11 | 0.3(3)      |
| P  | C5  | C6  | C7  | -60.2(2)    | C9  | C10 | C11 | C6  | 0.0(3)      |
| P  | C5  | C6  | C11 | 121.10(17)  | C11 | C6  | C7  | C8  | 0.8(3)      |
| P  | C5  | C12 | C13 | -42.3(2)    | C12 | C5  | C6  | C7  | -176.53(17) |
| P  | C5  | C12 | C17 | 143.96(15)  | C12 | C5  | C6  | C11 | 4.8(2)      |
| P  | C5  | C18 | C19 | 118.38(17)  | C12 | C5  | C18 | C19 | -125.50(19) |
| P  | C5  | C18 | C23 | -62.97(19)  | C12 | C5  | C18 | C23 | 53.1(2)     |
| N2 | C2  | C3  | N1  | -0.1(2)     | C12 | C13 | C14 | C15 | 0.3(3)      |
| C1 | N1  | C3  | C2  | 0.0(2)      | C13 | C12 | C17 | C16 | 0.8(3)      |
| C1 | N2  | C2  | C3  | 0.1(2)      | C13 | C14 | C15 | C16 | 0.1(3)      |
| C2 | N2  | C1  | N1  | -0.1(2)     | C14 | C15 | C16 | C17 | -0.1(3)     |
| C3 | N1  | C1  | N2  | 0.0(2)      | C15 | C16 | C17 | C12 | -0.4(3)     |
| C4 | N2  | C1  | N1  | -178.51(18) | C17 | C12 | C13 | C14 | -0.8(3)     |
| C4 | N2  | C2  | C3  | 178.57(19)  | C18 | C5  | C6  | C7  | 60.7(2)     |
| C5 | P   | N1  | C1  | -112.13(16) | C18 | C5  | C6  | C11 | -117.92(19) |
| C5 | P   | N1  | C3  | 75.84(18)   | C18 | C5  | C12 | C13 | -159.88(17) |
| C5 | C6  | C7  | C8  | -177.94(18) | C18 | C5  | C12 | C17 | 26.4(2)     |
| C5 | C6  | C11 | C10 | 178.18(17)  | C18 | C19 | C20 | C21 | -0.2(3)     |
| C5 | C12 | C13 | C14 | -174.65(17) | C19 | C18 | C23 | C22 | -3.6(3)     |
| C5 | C12 | C17 | C16 | 174.71(17)  | C19 | C20 | C21 | C22 | -1.9(3)     |
| C5 | C18 | C19 | C20 | -178.43(17) | C20 | C21 | C22 | C23 | 1.2(3)      |
| C5 | C18 | C23 | C22 | 177.68(17)  | C21 | C22 | C23 | C18 | 1.6(3)      |
| C6 | C5  | C12 | C13 | 75.9(2)     | C23 | C18 | C19 | C20 | 2.9(3)      |
| C6 | C5  | C12 | C17 | -97.83(19)  | B   | P   | N1  | C1  | 2.87(18)    |
| C6 | C5  | C18 | C19 | -3.0(2)     | B   | P   | N1  | C3  | -169.17(17) |
| C6 | C5  | C18 | C23 | 175.62(16)  |     |     |     |     |             |

## Compound 6

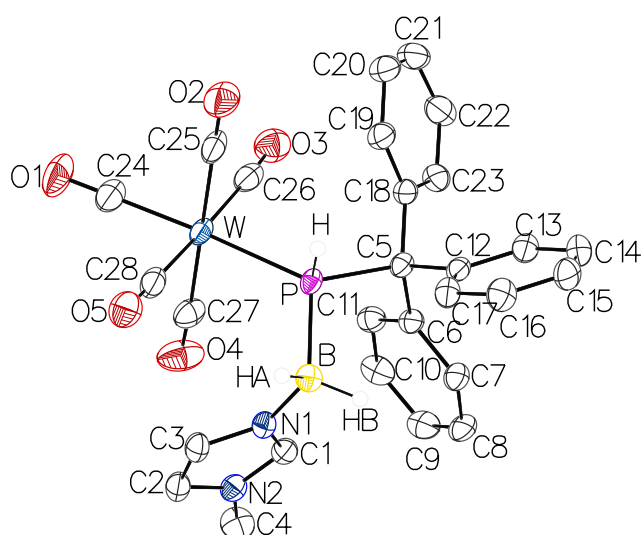

**Fig. S29** Molecular structures of **6** in the single crystal lattice at 100(2) K. Thermal ellipsoids are set at 50% probability level. Solvent molecules and hydrogen atoms were omitted for clarity except for those bound to phosphorus and boron atoms. Suitable single crystals were obtained as clear colourless blocks by cooling a concentrated solution of **6** in THF at  $-30\text{ }^{\circ}\text{C}$ . CCDC 2320468.

**Table S5** Crystal data and structure refinements for **6**.

|                                                  |                                                                                             |
|--------------------------------------------------|---------------------------------------------------------------------------------------------|
| Identification code                              | GSTR804, DB-636 // GXraymo_7283f                                                            |
| Crystal habitus                                  | clear yellow block                                                                          |
| Device type                                      | Bruker D8 Venture                                                                           |
| Empirical formula                                | $\text{C}_{32}\text{H}_{32}\text{BN}_2\text{O}_6\text{PW}$                                  |
| Moiety formula                                   | $\text{C}_{28}\text{H}_{24}\text{BN}_2\text{O}_5\text{PW}$ , $\text{C}_4\text{H}_8\text{O}$ |
| Formula weight / g/mol                           | 766.22                                                                                      |
| $T / \text{K}$                                   | 100.0                                                                                       |
| Crystal system                                   | triclinic                                                                                   |
| Space group                                      | $P\bar{1}$                                                                                  |
| $a / \text{\AA}$                                 | 9.5360(6)                                                                                   |
| $b / \text{\AA}$                                 | 12.7052(8)                                                                                  |
| $c / \text{\AA}$                                 | 13.0180(7)                                                                                  |
| $\alpha / ^{\circ}$                              | 86.357(2)                                                                                   |
| $\beta / ^{\circ}$                               | 80.306(2)                                                                                   |
| $\gamma / ^{\circ}$                              | 85.980(2)                                                                                   |
| $V / \text{\AA}^3$                               | 1548.73(16)                                                                                 |
| $Z$                                              | 2                                                                                           |
| $\rho_{\text{calc}} / \text{g/cm}^3$             | 1.643                                                                                       |
| $\mu / \text{mm}^{-1}$                           | 3.828                                                                                       |
| $F(000)$                                         | 760.0                                                                                       |
| Crystal size / $\text{mm}^3$                     | $0.4 \times 0.28 \times 0.24$                                                               |
| Absorption correction                            | multi-scan                                                                                  |
| Min. and max. transmission                       | 0.4882 and 0.7461                                                                           |
| Radiation                                        | Mo- $K_{\alpha}$ ( $\lambda = 0.71073 \text{ \AA}$ )                                        |
| $2\theta$ range for data collection / $^{\circ}$ | 4.342 to 55.998                                                                             |

|                                                |                                                              |
|------------------------------------------------|--------------------------------------------------------------|
| Completeness to $\theta$                       | 0.985                                                        |
| Index ranges                                   | $-12 \leq h \leq 12, -16 \leq k \leq 16, -17 \leq l \leq 17$ |
| Reflections collected                          | 50193                                                        |
| Independent reflections                        | 7393 ( $R_{int} = 0.0381, R_{\sigma} = 0.0296$ )             |
| Data / restraints / parameters                 | 7393 / 0 / 398                                               |
| Goodness-of-fit on $F^2$                       | 1.050                                                        |
| Final $R$ indexes ( $I \geq 2\sigma(I)$ )      | $R_1 = 0.0154, \omega R_2 = 0.0359$                          |
| Final $R$ indexes (all data)                   | $R_1 = 0.0159, \omega R_2 = 0.0361$                          |
| Largest diff. peak and hole / $e/\text{\AA}^3$ | 0.63 and $-1.05$                                             |

**Table S6** Bond lengths for **6**.

| Atom | Atom | Length / $\text{\AA}$ | Atom | Atom | Length / $\text{\AA}$ |
|------|------|-----------------------|------|------|-----------------------|
| W    | P    | 2.5650(4)             | C6   | C7   | 1.397(2)              |
| W    | C24  | 1.9943(16)            | C6   | C11  | 1.4048(19)            |
| W    | C25  | 2.0465(16)            | C7   | C8   | 1.397(2)              |
| W    | C26  | 2.0377(17)            | C8   | C9   | 1.388(2)              |
| W    | C27  | 2.0510(16)            | C9   | C10  | 1.394(2)              |
| W    | C28  | 2.0509(17)            | C10  | C11  | 1.390(2)              |
| P    | C5   | 1.9179(14)            | C12  | C13  | 1.402(2)              |
| P    | B    | 1.9904(16)            | C12  | C17  | 1.395(2)              |
| O1   | C24  | 1.149(2)              | C13  | C14  | 1.388(2)              |
| O2   | C25  | 1.132(2)              | C14  | C15  | 1.390(2)              |
| O3   | C26  | 1.147(2)              | C15  | C16  | 1.383(2)              |
| O4   | C27  | 1.137(2)              | C16  | C17  | 1.3970(19)            |
| O5   | C28  | 1.142(2)              | C18  | C19  | 1.400(2)              |
| N1   | C1   | 1.3261(19)            | C18  | C23  | 1.398(2)              |
| N1   | C3   | 1.3853(18)            | C19  | C20  | 1.394(2)              |
| N1   | B    | 1.5586(19)            | C20  | C21  | 1.390(3)              |
| N2   | C1   | 1.3328(18)            | C21  | C22  | 1.384(3)              |
| N2   | C2   | 1.3757(19)            | C22  | C23  | 1.397(2)              |
| N2   | C4   | 1.4565(19)            | O6   | C29  | 1.428(2)              |
| C2   | C3   | 1.357(2)              | O6   | C32  | 1.425(2)              |
| C5   | C6   | 1.5379(19)            | C29  | C30  | 1.532(2)              |
| C5   | C12  | 1.5487(18)            | C30  | C31  | 1.542(2)              |
| C5   | C18  | 1.5387(19)            | C31  | C32  | 1.524(2)              |

**Table S7** Bond angles for **6**.

| Atom | Atom | Atom | Angle / °  | Atom | Atom | Atom | Angle / °  |
|------|------|------|------------|------|------|------|------------|
| C24  | W    | P    | 173.51(5)  | C7   | C6   | C11  | 117.67(13) |
| C24  | W    | C25  | 90.56(6)   | C11  | C6   | C5   | 119.86(12) |
| C24  | W    | C26  | 89.31(6)   | C8   | C7   | C6   | 120.99(14) |
| C24  | W    | C27  | 88.44(6)   | C9   | C8   | C7   | 120.69(14) |
| C24  | W    | C28  | 89.92(6)   | C8   | C9   | C10  | 119.01(14) |
| C25  | W    | P    | 87.84(4)   | C11  | C10  | C9   | 120.33(14) |
| C25  | W    | C27  | 177.15(6)  | C10  | C11  | C6   | 121.30(14) |
| C25  | W    | C28  | 90.27(6)   | C13  | C12  | C5   | 117.91(12) |
| C26  | W    | P    | 96.91(4)   | C17  | C12  | C5   | 124.65(13) |
| C26  | W    | C25  | 87.80(6)   | C17  | C12  | C13  | 117.44(13) |
| C26  | W    | C27  | 89.53(6)   | C14  | C13  | C12  | 121.51(14) |
| C26  | W    | C28  | 177.91(6)  | C13  | C14  | C15  | 120.19(14) |
| C27  | W    | P    | 93.45(4)   | C16  | C15  | C14  | 119.24(14) |
| C28  | W    | P    | 83.80(4)   | C15  | C16  | C17  | 120.52(14) |
| C28  | W    | C27  | 92.40(6)   | C12  | C17  | C16  | 121.11(14) |
| C5   | P    | W    | 123.10(4)  | C19  | C18  | C5   | 119.55(13) |
| C5   | P    | B    | 107.48(6)  | C23  | C18  | C5   | 122.31(13) |
| B    | P    | W    | 118.20(5)  | C23  | C18  | C19  | 118.00(14) |
| C1   | N1   | C3   | 107.09(12) | C20  | C19  | C18  | 121.05(15) |
| C1   | N1   | B    | 124.91(12) | C21  | C20  | C19  | 120.06(15) |
| C3   | N1   | B    | 128.00(12) | C22  | C21  | C20  | 119.60(15) |
| C1   | N2   | C2   | 108.47(12) | C21  | C22  | C23  | 120.33(15) |
| C1   | N2   | C4   | 125.11(13) | C22  | C23  | C18  | 120.85(15) |
| C2   | N2   | C4   | 126.42(13) | O1   | C24  | W    | 179.56(15) |
| N1   | C1   | N2   | 109.88(13) | O2   | C25  | W    | 178.79(15) |
| C3   | C2   | N2   | 106.40(12) | O3   | C26  | W    | 176.80(13) |
| C2   | C3   | N1   | 108.15(13) | O4   | C27  | W    | 175.47(13) |
| C6   | C5   | P    | 104.42(9)  | O5   | C28  | W    | 178.36(14) |
| C6   | C5   | C12  | 111.54(11) | N1   | B    | P    | 111.31(9)  |
| C6   | C5   | C18  | 112.47(11) | C32  | O6   | C29  | 104.68(13) |
| C12  | C5   | P    | 112.25(9)  | O6   | C29  | C30  | 105.52(13) |
| C18  | C5   | P    | 109.58(9)  | C29  | C30  | C31  | 103.61(13) |
| C18  | C5   | C12  | 106.68(11) | C32  | C31  | C30  | 103.54(13) |
| C7   | C6   | C5   | 122.41(12) | O6   | C32  | C31  | 105.69(14) |

## 6 Computational Methods

Quantum chemical calculations were performed with ORCA (v. 4.2.1).<sup>8</sup> All geometry optimizations were run in redundant internal coordinates with tight convergence criteria, also computed using Grimme's fast PBEh-3c composite approach.<sup>9</sup> In all optimizations and energy evaluations, the 2010 Grimme's semiempirical atom-pair-wise correction (DFT-D3 methods), taking into account the major part of the contribution of dispersion forces to the energy, was included.<sup>10</sup> Harmonic frequency calculations verified the nature of the computed species as minima or TS (transition state) structures, featuring none or only one negative eigenvalues, respectively. Moreover, all TS structures were confirmed by intrinsic reaction coordinate (IRC) calculations. From these geometries, all reported electronic data were corrected for the Gibbs energy term at the optimization level and obtained by means of single-point (SP) calculations using the double-hybrid-meta-GGA functional PWPB95<sup>11</sup> with Grimme's D3 correction (PWPB95-D3) as well as the more polarized Ahlrichs' segmented def2-QZVPP<sup>12</sup> basis set. The frontier molecular orbitals (FMOs) energies were obtained at the same PWPB95-D3/def2-QZVPP level, although the Kohn-Sham isosurfaces were drawn at the optimization level (Figure 3). AIM wavefunction analyses were performed with the B3LYP<sup>13</sup> functional and the def2-TZVPP<sup>12</sup> basis set and using Aimall.<sup>14</sup> Solvent effects (tetrahydrofuran, dichloromethane, toluene or benzene) were included using the Conductor-like Polarizable Continuum Model (CPCM).<sup>15</sup> Isotropic values ( $\sigma_{\text{iso}}$ ) for the <sup>31</sup>P NMR magnetic shielding tensor were computed using the Gauge Including Atomic Orbital (GIAO) method,<sup>16</sup> using the PBE0<sup>17</sup> functional and the def2-TZVP basis set.<sup>12</sup> The expected chemical shifts  $\delta^{\text{P}}$  were estimated through a linear equation  $\delta^{\text{P}} = 241.6491 - 0.8664 \cdot \sigma_{\text{iso}}$ , which in turn was obtained from a linear regression ( $R^2 = 0.9968$ ) of seventeen reference compounds spanning a wide range of chemical shifts, from  $\delta^{\text{P}} -525.0$  (P<sub>4</sub>) to 598.6 ppm (Tsi-P=P-Tsi, Tsi referring to the trisyl (or tris(trimethylsilyl)methyl) substituent), as reported elsewhere.<sup>7,18</sup>

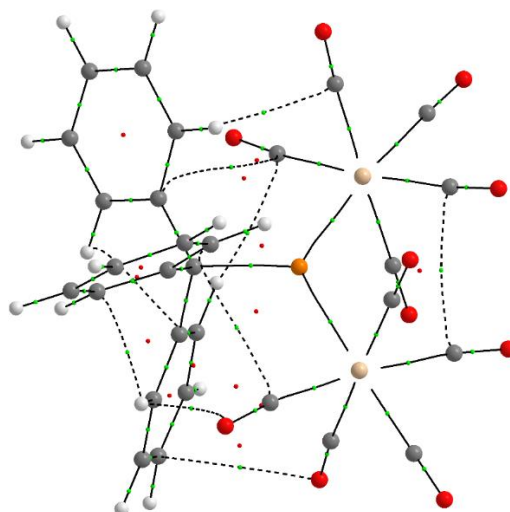

**Fig. S30** Computed [CPCMtol/B3LYP/def2-TZVP(ecp)] structure for **2** showing bond and ring critical points (small green and red spheres, respectively) as well as bond paths (non-covalent interactions shown by dashed lines).

### Full PES for the reaction of 1' with H<sub>3</sub>B·SMe<sub>2</sub>

Besides the main path described in the main text (Scheme 4), the alternative S<sub>N</sub>1-type mechanism is disfavoured and requires initial rather endergonic barrierless elimination of *N*-MeIm and P-insertion of the phosphinidene complex 7' into the B-H bond of the H<sub>3</sub>B·SMe<sub>2</sub> reagent affording 8', from which dimethyl sulphide is replaced at the boron centre by *N*-MeIm in a typical S<sub>N</sub>2 reaction (Scheme S114). Phosphinidene 7' can also react with the *N*-MeIm·SMe<sub>2</sub> adduct, which is exergonically produced from *N*-MeIm and SMe<sub>2</sub> ( $\Delta\Delta G = -10.29$  kcal/mol) over a moderately low barrier ( $\Delta\Delta G^\ddagger = 24.40$  kcal/mol). This reaction can take place through the imidazole N3 atom giving the highly unstable product 14' or through C2 affording 9', the latter readily undergoing B-to-P hydride transfer to give 10'. Upon cleavage of the C-P bond, the ion pair 11' or its B...H bound derivative 12' are formed, both allowing the low-barrier formation of the final model complex 6' (Scheme S114). Intermediate 9' can also lead to the slightly less stable P-decomplexed bicyclic phosphonium borate 13'. Finally, the final phosphino-borane *N*-MeIm complex adduct 6' could undergo a very unfavoured N-to-C [1,2]-boron shift to the less stable isomer 15' (Scheme S114).

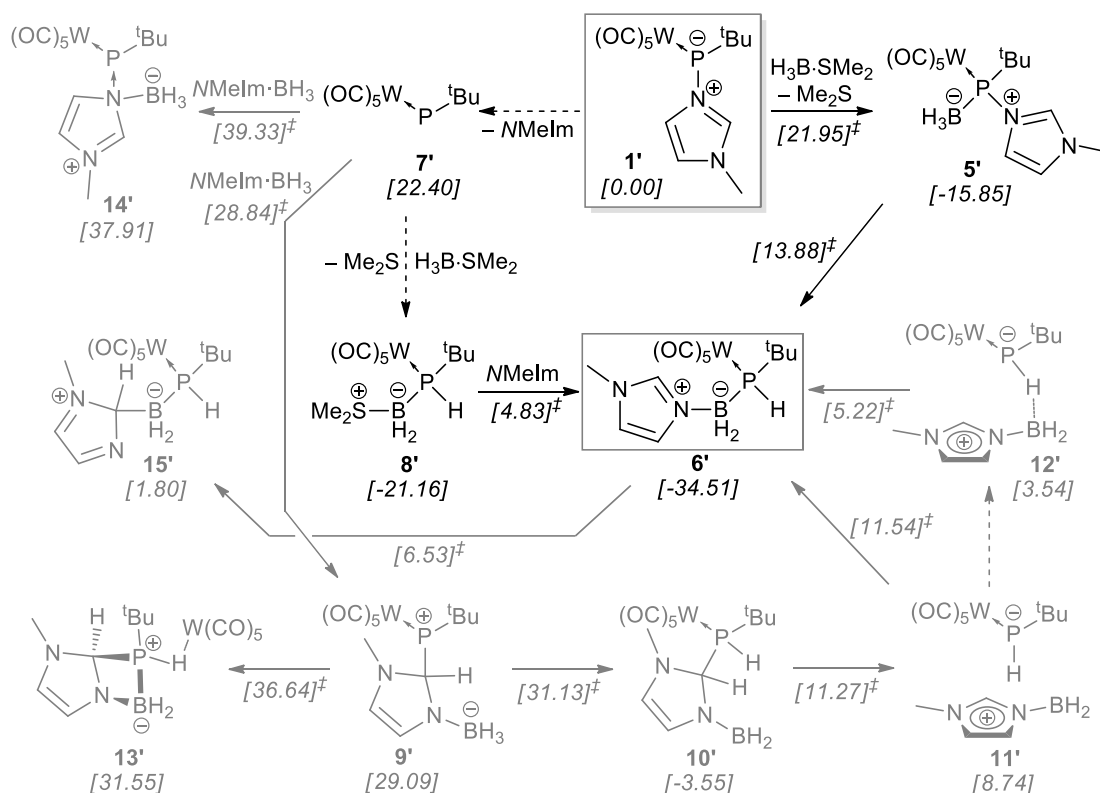

**Fig. S31** Proposed full potential energy surface for the formation of rearranged model product 6' from phosphinidene adduct complex 1'. In square brackets the computed [CPCM<sub>THF</sub>/PWPB95-D3/def2-QZVPP//CPCM<sub>THF</sub>/PBEh-3c] relative Gibbs free energies (kcal/mol) for ground and transition states (the latter indicated by the ‡ superscript). Dashed arrows indicate barrierless processes.

## 7 Calculated structures

Cartesian coordinates (in Å) and energies (in hartrees) for all computed species. Geometries, zero-point energy correction (ZPE) and Gibbs energy correction ( $G_{\text{corr}}$ ) at the optimization level (*vide supra*), whereas electronic energies are computed at the CPCM(THF)/PWPB95-D3/def2-QZVPP(ecp) level, unless otherwise stated. Solvents different from THF are indicated in square brackets.

$\text{BH}_3\cdot\text{SMe}_2$

$E = -504.5986302725$  au

$ZPE = 0.11030038$  au

$G_{\text{corr}} = 0.08078862$  au

|   |           |           |           |   |           |           |           |
|---|-----------|-----------|-----------|---|-----------|-----------|-----------|
| B | -0.163242 | 0.010727  | -0.067181 | H | 0.355633  | -1.460100 | -2.646604 |
| H | 0.784942  | 0.358920  | -0.732224 | H | -0.316088 | -2.734767 | -1.603098 |
| H | -0.727905 | 0.923431  | 0.487893  | C | -1.677616 | 0.614541  | -2.521224 |
| H | 0.078798  | -0.908852 | 0.678238  | H | -2.168631 | 1.447946  | -2.024470 |
| S | -1.484240 | -0.699434 | -1.307203 | H | -0.702803 | 0.928256  | -2.888183 |
| C | -0.559768 | -1.908625 | -2.266824 | H | -2.301138 | 0.262818  | -3.339916 |
| H | -1.177694 | -2.271827 | -3.084768 |   |           |           |           |

$\text{Me}_2\text{S}$

$E = -477.9619654310$  au

$ZPE = 0.07799832$  au

$G_{\text{corr}} = 0.05101430$  au

|   |           |           |           |   |           |          |           |
|---|-----------|-----------|-----------|---|-----------|----------|-----------|
| S | -1.313958 | -0.740359 | -1.294333 | C | -1.768562 | 0.567799 | -2.452700 |
| C | -0.531705 | -1.899277 | -2.436647 | H | -2.265510 | 1.353454 | -1.886403 |
| H | -1.234218 | -2.239621 | -3.196510 | H | -0.888752 | 0.991085 | -2.935897 |
| H | 0.334801  | -1.451370 | -2.921660 | H | -2.455998 | 0.200033 | -3.213546 |
| H | -0.200032 | -2.760475 | -1.859401 |   |           |          |           |

$N\text{-Melm}$

$E = -265.4765447343$  au

$ZPE = 0.10213822$  au

$G_{\text{corr}} = 0.07436292$  au

|   |           |           |           |   |           |           |           |
|---|-----------|-----------|-----------|---|-----------|-----------|-----------|
| N | -2.174600 | -1.716837 | -1.350332 | H | -6.307446 | -1.001496 | -1.237650 |
| C | -3.232665 | -1.623170 | -0.586596 | H | -5.647616 | 0.464765  | -0.493151 |
| N | -4.217880 | -0.907713 | -1.168267 | H | -5.591311 | -1.072648 | 0.375476  |
| C | -3.753830 | -0.516530 | -2.391787 | H | -3.344771 | -2.053089 | 0.397856  |
| C | -2.489986 | -1.026759 | -2.484540 | H | -4.347111 | 0.073283  | -3.070568 |
| C | -5.513798 | -0.609544 | -0.604597 | H | -1.797750 | -0.931954 | -3.306945 |

$N\text{-Melm}\cdot\text{BH}_3$

$E = -292.1303685677$  au

$ZPE = 0.13527106$  au

$G_{\text{corr}} = 0.10489198$  au

|   |           |           |           |   |           |           |           |
|---|-----------|-----------|-----------|---|-----------|-----------|-----------|
| N | -2.198192 | -1.702818 | -1.357216 | C | -2.493290 | -1.016749 | -2.502374 |
| C | -3.250382 | -1.623077 | -0.570265 | C | -5.514354 | -0.610180 | -0.602928 |
| N | -4.212901 | -0.913271 | -1.161732 | H | -6.297706 | -1.002541 | -1.246550 |
| C | -3.751721 | -0.519344 | -2.388679 | H | -5.636411 | 0.465196  | -0.499468 |

|   |           |           |           |   |           |           |           |
|---|-----------|-----------|-----------|---|-----------|-----------|-----------|
| H | -5.598128 | -1.071355 | 0.376421  | B | -0.844453 | -2.456952 | -1.032892 |
| H | -3.330402 | -2.064067 | 0.409004  | H | -0.953098 | -2.934074 | 0.079623  |
| H | -4.346158 | 0.069891  | -3.065413 | H | -0.680585 | -3.326681 | -1.867342 |
| H | -1.789118 | -0.933377 | -3.311902 | H | 0.063360  | -1.648514 | -1.075370 |

(BH<sub>3</sub>·SMe<sub>2</sub>+NMelm→NMelm·BH<sub>3</sub>+SMe<sub>2</sub>)<sup>‡</sup>

$E = -770.0545922799$  au

$ZPE = 0.21230421$  au

$G_{\text{corr}} = 0.17345094$  au

$\nu = -321.07$  cm<sup>-1</sup>

|   |           |           |           |   |          |          |           |
|---|-----------|-----------|-----------|---|----------|----------|-----------|
| B | 0.207259  | 0.224572  | 0.027255  | N | 1.148231 | 2.257546 | 0.762172  |
| H | -0.035804 | -0.043128 | 1.172165  | C | 0.798135 | 3.433523 | 0.308743  |
| H | 1.267527  | -0.075841 | -0.444973 | N | 1.504133 | 4.421416 | 0.892939  |
| H | -0.567985 | 0.876762  | -0.615916 | C | 2.361627 | 3.830982 | 1.778419  |
| S | -0.810863 | -1.879304 | -0.668890 | C | 2.126025 | 2.489414 | 1.683038  |
| C | -2.367349 | -1.757323 | 0.228279  | C | 1.380997 | 5.837394 | 0.631925  |
| H | -2.860456 | -2.726316 | 0.283549  | H | 2.318883 | 6.240783 | 0.255444  |
| H | -2.196183 | -1.368524 | 1.231140  | H | 1.103079 | 6.371179 | 1.538476  |
| H | -3.007120 | -1.064692 | -0.314707 | H | 0.608871 | 5.996100 | -0.115928 |
| C | 0.092729  | -2.996884 | 0.415893  | H | 0.042861 | 3.622622 | -0.438788 |
| H | 1.088275  | -3.128562 | -0.002909 | H | 3.046136 | 4.401733 | 2.383494  |
| H | 0.182344  | -2.566301 | 1.412295  | H | 2.603416 | 1.687237 | 2.223158  |
| H | -0.399607 | -3.966233 | 0.471944  |   |          |          |           |

**1** [toluene]

$E = -1976.904309879727$  au

$ZPE = 0.42390259$  au (B3LYP-D3/def2TZVP(ecp))

$G_{\text{corr}} = 0.36180286$  au (B3LYP-D3/def2TZVP(ecp))

|   |           |           |           |   |           |           |           |
|---|-----------|-----------|-----------|---|-----------|-----------|-----------|
| P | -0.013401 | 0.290879  | 0.125654  | H | -3.645786 | -0.822604 | -2.133565 |
| W | -0.046488 | 2.826749  | -0.562418 | C | -4.445287 | 1.675231  | 0.678462  |
| C | 0.239583  | 4.726180  | -1.165015 | H | -2.601467 | 1.079287  | 1.546238  |
| O | 0.413394  | 5.815584  | -1.503595 | C | -5.335921 | 1.515843  | -0.377502 |
| C | -1.563946 | 2.577854  | -1.943941 | H | -5.707326 | 0.469129  | -2.214630 |
| O | -2.394397 | 2.471341  | -2.724224 | H | -4.653480 | 2.386850  | 1.467023  |
| C | -1.421731 | 3.564388  | 0.766726  | H | -6.247039 | 2.098815  | -0.420453 |
| O | -2.164301 | 4.055157  | 1.496338  | C | -1.388526 | -1.446390 | -1.584162 |
| C | 1.416496  | 2.987512  | 0.868742  | C | -0.715956 | -0.771779 | -2.601794 |
| O | 2.220535  | 3.052296  | 1.687242  | C | -1.910864 | -2.708989 | -1.877216 |
| C | 1.356142  | 2.249451  | -1.965954 | C | -0.548158 | -1.338545 | -3.860262 |
| O | 2.139288  | 1.968346  | -2.754304 | H | -0.324835 | 0.219526  | -2.428292 |
| C | -1.645993 | -0.792315 | -0.217705 | C | -1.753656 | -3.279621 | -3.134270 |
| C | -1.643294 | -1.850268 | 0.885261  | H | -2.456562 | -3.251264 | -1.117617 |
| C | -2.544120 | -1.851608 | 1.949352  | C | -1.065855 | -2.598530 | -4.133119 |
| C | -0.645737 | -2.836907 | 0.880507  | H | -0.015604 | -0.788328 | -4.625500 |
| C | -2.441054 | -2.782501 | 2.981420  | H | -2.173400 | -4.257995 | -3.332605 |
| H | -3.341774 | -1.125575 | 1.982662  | H | -0.939432 | -3.042826 | -5.112156 |
| C | -0.547662 | -3.773289 | 1.898816  | N | 0.012983  | 0.284447  | 1.971630  |
| H | 0.066947  | -2.861788 | 0.068085  | C | 0.688110  | -0.658070 | 2.632772  |
| C | -1.441811 | -3.745769 | 2.966506  | N | 0.551728  | -0.474855 | 3.945887  |
| H | -3.156891 | -2.753741 | 3.793633  | C | -0.234147 | 0.645400  | 4.146866  |
| H | 0.232162  | -4.524046 | 1.860507  | C | -0.561510 | 1.118087  | 2.918210  |
| H | -1.367238 | -4.473572 | 3.764557  | C | 1.114780  | -1.324614 | 4.986901  |
| C | -2.944123 | 0.016209  | -0.280385 | H | 0.309084  | -1.788809 | 5.552890  |
| C | -3.854646 | -0.134742 | -1.329245 | H | 1.737580  | -0.727823 | 5.650689  |
| C | -3.272754 | 0.935795  | 0.718170  | H | 1.717844  | -2.096764 | 4.517570  |
| C | -5.032332 | 0.604589  | -1.378834 | H | 1.253718  | -1.446020 | 2.173810  |



H -0.475827 1.001876 5.132088

H -1.130380 1.984256 2.648801

1'

$E = -1398.3979673186$  au

$ZPE = 0.27432915$  au

$G_{\text{corr}} = 0.22196562$  au

P -0.602680 0.592384 0.363179  
C -0.256281 0.438475 2.213456  
C 0.486996 -0.895349 2.337273  
H 0.747308 -1.080835 3.382498  
H -0.124964 -1.730638 1.992845  
H 1.417574 -0.907895 1.768327  
C 0.591801 1.551776 2.816595  
H 0.107787 2.526500 2.740431  
H 0.764036 1.362696 3.880649  
H 1.565555 1.621889 2.332818  
C -1.578324 0.330575 2.974756  
H -1.385356 0.061788 4.017134  
H -2.128170 1.273240 2.985725  
H -2.228773 -0.436264 2.549755  
N -1.863710 1.919744 0.417080  
C -3.132526 1.676452 0.125109  
N -3.836144 2.798017 0.211417  
C -2.986852 3.809672 0.578995  
C -1.755802 3.258296 0.702946

C -5.256187 2.936176 -0.049588  
H -5.414412 3.626411 -0.873965  
H -5.759798 3.307685 0.838812  
H -5.666017 1.966242 -0.312917  
H -3.531351 0.712877 -0.144468  
H -3.324005 4.822955 0.714244  
H -0.823299 3.721289 0.965956  
W 1.329351 1.544095 -1.116217  
C 2.675018 2.163268 -2.456631  
O 3.440773 2.526709 -3.237694  
C 1.665806 3.229864 -0.006445  
O 1.892891 4.182770 0.588535  
C 2.826857 0.610541 -0.070540  
O 3.695628 0.114220 0.485543  
C 1.028330 -0.175118 -2.211265  
O 0.869617 -1.128184 -2.820254  
C -0.164355 2.500541 -2.149325  
O -1.001616 3.034771 -2.716833

3 [toluene]

$E = -2341.760140558626$  au

$ZPE = 0.36438046$  au (B3LYP-D3/def2TZVP(ecp))

$G_{\text{corr}} = 0.29456188$  au (B3LYP-D3/def2TZVP(ecp))

P -0.090175 -0.081456 -0.085413  
C 0.094999 -0.039375 1.850926  
C 1.599666 0.234189 1.928365  
C 2.144503 1.449137 2.349886  
C 3.519881 1.644059 2.380375  
C 4.386067 0.640925 1.962551  
C 3.861008 -0.559961 1.501719  
C 2.487489 -0.759077 1.486882  
H 1.500404 2.251203 2.669639  
H 3.912228 2.591923 2.725872  
H 5.456384 0.798910 1.981675  
H 4.517460 -1.347919 1.156136  
H 2.102731 -1.709499 1.150679  
C -0.307375 -1.343931 2.547941  
C 0.529153 -2.002711 3.447944  
C 0.095712 -3.138162 4.125520  
C -1.184080 -3.634694 3.920394  
C -2.040121 -2.966750 3.050023  
C -1.606541 -1.829387 2.387023  
H 1.527498 -1.636005 3.631999  
H 0.767785 -3.633945 4.814400  
H -1.517329 -4.523444 4.440472  
H -3.048170 -3.327200 2.890636  
H -2.297432 -1.295339 1.751966  
C -0.812162 1.029871 2.463206  
C -0.565013 1.501912 3.754387

C -1.422782 2.410680 4.358414  
C -2.563495 2.850293 3.693357  
C -2.848397 2.350738 2.429739  
C -1.981781 1.445393 1.829441  
H 0.299208 1.148343 4.299471  
H -1.202852 2.770187 5.355597  
H -3.229992 3.561823 4.163292  
H -3.743444 2.661285 1.906314  
H -2.236126 1.057909 0.852139  
W 0.328497 2.080250 -1.232364  
C -1.709153 2.218274 -1.573049  
O -2.834279 2.277419 -1.762464  
C 0.176268 3.274899 0.455767  
O 0.128017 4.039567 1.303501  
C 2.384753 1.894123 -0.973369  
O 3.516737 1.784601 -0.909813  
C 0.594299 1.140014 -3.041732  
O 0.794477 0.702732 -4.080298  
C 0.633012 3.823547 -2.270743  
O 0.800026 4.796414 -2.850520  
W -0.460421 -2.224467 -1.235372  
C 0.341177 -3.447104 0.234404  
O 0.764208 -4.198879 0.981892  
C -2.346481 -2.669462 -0.486775  
O -3.393002 -2.949192 -0.128341  
C -1.420153 -1.167039 -2.727166

|   |           |           |           |
|---|-----------|-----------|-----------|
| O | -2.008506 | -0.629161 | -3.545176 |
| C | 1.417165  | -1.866358 | -2.040006 |
| O | 2.452918  | -1.663817 | -2.473196 |

|   |           |           |           |
|---|-----------|-----------|-----------|
| C | -0.594399 | -3.893316 | -2.435460 |
| O | -0.648360 | -4.808381 | -3.118743 |

4 [benzene]

$E = -3916.490330557042$  au (opt B3LYP-D3/def2TZVP(ecp))

$ZPE = 0.47842463$  au (B3LYP-D3/def2TZVP(ecp))

$G_{\text{corr}} = 0.39624814$  au (B3LYP-D3/def2TZVP(ecp))

|   |           |           |           |
|---|-----------|-----------|-----------|
| P | 0.079587  | -0.126512 | -0.034024 |
| C | -0.389804 | 0.184782  | 1.843721  |
| C | 0.870310  | -0.336001 | 2.556155  |
| C | 1.766170  | 0.504908  | 3.216990  |
| C | 2.885095  | -0.005327 | 3.864771  |
| C | 3.140940  | -1.369652 | 3.867509  |
| C | 2.268986  | -2.219798 | 3.199521  |
| C | 1.158897  | -1.703991 | 2.550811  |
| H | 1.592862  | 1.566793  | 3.252072  |
| H | 3.555932  | 0.675380  | 4.373313  |
| H | 4.011708  | -1.764478 | 4.374405  |
| H | 2.453523  | -3.286093 | 3.179063  |
| H | 0.488579  | -2.380669 | 2.054714  |
| C | -1.680455 | -0.502338 | 2.340235  |
| C | -1.699507 | -1.484384 | 3.331513  |
| C | -2.899499 | -1.988647 | 3.822250  |
| C | -4.112121 | -1.517382 | 3.343928  |
| C | -4.110020 | -0.509844 | 2.387035  |
| C | -2.912345 | -0.003479 | 1.910652  |
| H | -0.785163 | -1.858022 | 3.760179  |
| H | -2.874871 | -2.753312 | 4.588137  |
| H | -5.044930 | -1.914606 | 3.723051  |
| H | -5.043261 | -0.099975 | 2.021874  |
| H | -2.937393 | 0.832144  | 1.233588  |
| C | -0.613292 | 1.687885  | 2.097219  |
| C | -0.810222 | 2.084879  | 3.425074  |
| C | -1.060457 | 3.407449  | 3.748286  |
| C | -1.142166 | 4.371685  | 2.746334  |
| C | -0.981333 | 3.987571  | 1.425372  |
| C | -0.721879 | 2.657057  | 1.108756  |
| H | -0.774453 | 1.346243  | 4.214386  |
| H | -1.201545 | 3.685634  | 4.785025  |
| H | -1.341677 | 5.405639  | 2.996752  |
| H | -1.061401 | 4.716189  | 0.628893  |
| H | -0.620982 | 2.395950  | 0.068757  |
| W | 2.146751  | 0.824565  | -0.850378 |
| C | 1.156717  | 2.261795  | -1.999047 |
| O | 0.664300  | 3.089095  | -2.602777 |
| C | 2.348215  | 2.227135  | 0.656372  |
| O | 2.581377  | 3.056253  | 1.404588  |

|   |           |           |           |
|---|-----------|-----------|-----------|
| C | 3.335147  | -0.507838 | 0.235544  |
| O | 4.026549  | -1.229365 | 0.773006  |
| C | 2.297568  | -0.475343 | -2.463300 |
| O | 2.578112  | -1.133555 | -3.351029 |
| C | 3.918837  | 1.604295  | -1.616139 |
| O | 4.885745  | 2.031085  | -2.038243 |
| B | -1.048894 | -1.533299 | -1.055586 |
| C | -0.668149 | -2.830957 | -0.145844 |
| C | 0.608666  | -3.392778 | -0.184734 |
| C | 0.996419  | -4.493796 | 0.553599  |
| C | 0.088311  | -5.084868 | 1.415753  |
| C | -1.191399 | -4.564552 | 1.502657  |
| C | -1.544388 | -3.466287 | 0.732969  |
| F | 1.560028  | -2.852996 | -0.969666 |
| F | 2.242351  | -4.970570 | 0.468500  |
| F | 0.446301  | -6.130486 | 2.158944  |
| F | -2.078490 | -5.125459 | 2.328458  |
| F | -2.805873 | -3.049007 | 0.872062  |
| C | -2.626090 | -1.173972 | -1.216432 |
| C | -3.166417 | 0.099036  | -1.173196 |
| C | -4.489477 | 0.389580  | -1.462999 |
| C | -5.338733 | -0.630531 | -1.849003 |
| C | -4.838638 | -1.919124 | -1.950191 |
| C | -3.509559 | -2.157625 | -1.651518 |
| F | -2.398118 | 1.157222  | -0.827663 |
| F | -4.947764 | 1.643570  | -1.370043 |
| F | -6.617143 | -0.376273 | -2.133498 |
| F | -5.640052 | -2.912822 | -2.348404 |
| F | -3.071034 | -3.417579 | -1.823912 |
| C | -0.555868 | -1.634379 | -2.614327 |
| C | -0.264569 | -2.820837 | -3.285711 |
| C | 0.029045  | -2.883765 | -4.639773 |
| C | 0.013879  | -1.732770 | -5.406000 |
| C | -0.316889 | -0.534753 | -4.799956 |
| C | -0.599401 | -0.518611 | -3.446687 |
| F | -0.268562 | -4.006509 | -2.653605 |
| F | 0.320238  | -4.054848 | -5.214399 |
| F | 0.302270  | -1.779114 | -6.706051 |
| F | -0.355108 | 0.592551  | -5.518995 |
| F | -0.946274 | 0.680342  | -2.938733 |

(1'→5')<sup>‡</sup>

$E = -1902.9830201490$  au

$ZPE = 0.38455619$  au

$G_{\text{corr}} = 0.32416144$  au

$\nu = -305.28$  cm<sup>-1</sup>

|   |          |          |           |
|---|----------|----------|-----------|
| P | 0.114669 | 0.011294 | -0.130400 |
|---|----------|----------|-----------|

|   |          |           |          |
|---|----------|-----------|----------|
| C | 1.980013 | -0.032922 | 0.136680 |
|---|----------|-----------|----------|

|   |           |           |           |   |           |           |           |
|---|-----------|-----------|-----------|---|-----------|-----------|-----------|
| C | 2.372738  | 1.446582  | 0.195823  | W | -1.403485 | 0.348000  | 1.959879  |
| H | 3.451894  | 1.539197  | 0.342785  | C | -2.753798 | 0.653642  | 3.398398  |
| H | 2.112977  | 1.966705  | -0.727479 | O | -3.547512 | 0.811484  | 4.219702  |
| H | 1.890130  | 1.972237  | 1.020758  | C | -0.613736 | -1.187701 | 3.053178  |
| C | 2.441577  | -0.737182 | 1.407053  | O | -0.194667 | -2.030842 | 3.707342  |
| H | 2.177940  | -1.795963 | 1.410585  | C | -0.110539 | 1.626249  | 2.908493  |
| H | 3.530671  | -0.678186 | 1.498655  | O | 0.582923  | 2.340756  | 3.473522  |
| H | 2.010474  | -0.281555 | 2.298217  | C | -2.198583 | 1.944984  | 0.918515  |
| C | 2.653405  | -0.666789 | -1.081114 | O | -2.664828 | 2.843802  | 0.391432  |
| H | 3.736820  | -0.531035 | -1.018993 | C | -2.675796 | -0.941352 | 0.994362  |
| H | 2.469626  | -1.740840 | -1.143018 | O | -3.373744 | -1.663010 | 0.445876  |
| H | 2.312774  | -0.209717 | -2.012013 | B | -0.710849 | 1.383398  | -2.409825 |
| N | -0.146736 | -1.726728 | -0.643740 | H | -0.394497 | 2.383894  | -1.832405 |
| C | -0.483005 | -2.025853 | -1.889374 | H | 0.110189  | 0.801494  | -3.068531 |
| N | -0.651699 | -3.336843 | -2.004844 | H | -1.760642 | 0.851929  | -2.160692 |
| C | -0.411704 | -3.910272 | -0.782328 | H | -3.526742 | 2.543921  | -2.739509 |
| C | -0.099596 | -2.901440 | 0.066027  | C | -3.076936 | 3.262598  | -3.422831 |
| C | -1.040367 | -4.042328 | -3.210814 | S | -1.665693 | 2.524116  | -4.261410 |
| H | -2.001579 | -4.527557 | -3.062922 | H | -2.710342 | 4.111177  | -2.849341 |
| H | -0.290004 | -4.787964 | -3.459509 | H | -3.815396 | 3.610993  | -4.142571 |
| H | -1.120592 | -3.332841 | -4.028436 | C | -2.466387 | 1.130853  | -5.072285 |
| H | -0.601008 | -1.305404 | -2.682123 | H | -2.940379 | 0.486890  | -4.332470 |
| H | -0.488320 | -4.971581 | -0.619032 | H | -3.204215 | 1.474271  | -5.795179 |
| H | 0.146295  | -2.937852 | 1.110709  | H | -1.695904 | 0.566620  | -5.593863 |

5'

$E = -1425.0618224374$  au

$ZPE = 0.30699807$  au

$G_{\text{corr}} = 0.25367733$  au

|   |           |           |           |   |           |           |           |
|---|-----------|-----------|-----------|---|-----------|-----------|-----------|
| P | 0.005965  | 0.113547  | -0.004356 | H | -4.717857 | -3.267458 | -0.707762 |
| C | 0.013463  | 0.001806  | 1.872884  | H | -3.303448 | -3.698928 | -1.682856 |
| C | 1.491163  | -0.004282 | 2.275435  | H | -1.276274 | -2.428179 | -1.041506 |
| H | 1.566071  | 0.018442  | 3.364925  | H | -4.937723 | -0.409282 | -0.580101 |
| H | 2.001945  | -0.898341 | 1.920458  | H | -2.898509 | 1.250902  | 0.190808  |
| H | 2.034077  | 0.862893  | 1.897063  | W | 0.308054  | 2.391287  | -1.162506 |
| C | -0.685775 | 1.197254  | 2.512589  | C | 0.574962  | 4.061708  | -2.238747 |
| H | -1.742281 | 1.255660  | 2.246450  | O | 0.722010  | 5.012749  | -2.866421 |
| H | -0.635627 | 1.109398  | 3.600698  | C | -1.203225 | 3.340086  | -0.162951 |
| H | -0.214352 | 2.140736  | 2.238443  | O | -2.032924 | 3.919956  | 0.372584  |
| C | -0.640776 | -1.293862 | 2.350189  | C | 1.634004  | 3.103620  | 0.236500  |
| H | -0.481219 | -1.400179 | 3.425879  | O | 2.373023  | 3.540531  | 0.990742  |
| H | -1.719429 | -1.299150 | 2.186591  | C | 1.883569  | 1.542940  | -2.197830 |
| H | -0.212879 | -2.171153 | 1.864939  | O | 2.763271  | 1.134495  | -2.796070 |
| N | -1.687230 | -0.452853 | -0.336337 | C | -1.010100 | 1.684098  | -2.572881 |
| C | -1.989859 | -1.656028 | -0.807751 | O | -1.742644 | 1.286341  | -3.353540 |
| N | -3.302417 | -1.754666 | -0.950088 | B | 1.062384  | -1.348070 | -0.732179 |
| C | -3.874395 | -0.572944 | -0.553103 | H | 2.213939  | -1.011380 | -0.567371 |
| C | -2.862703 | 0.240749  | -0.172383 | H | 0.818981  | -2.395024 | -0.166016 |
| C | -4.016243 | -2.912237 | -1.457475 | H | 0.797111  | -1.398698 | -1.916649 |
| H | -4.552978 | -2.643983 | -2.363353 |   |           |           |           |

(5'→6')<sup>‡</sup>

$E = -1425.0101507493$  au

$ZPE = 0.30294434$  au

$G_{\text{corr}} = 0.24937939$  au

$\nu = -305.28$  cm<sup>-1</sup>

|   |           |           |           |   |           |           |           |
|---|-----------|-----------|-----------|---|-----------|-----------|-----------|
| P | 0.586397  | 0.006987  | 0.138302  | H | -5.095205 | -3.046668 | -1.674047 |
| C | 0.479543  | 0.027705  | 2.018330  | H | -3.668952 | -2.812043 | -2.689515 |
| C | 1.880982  | 0.318468  | 2.561649  | H | -1.798760 | -1.727786 | -1.545689 |
| H | 1.834850  | 0.421919  | 3.648495  | H | -5.607428 | -0.645361 | -0.182248 |
| H | 2.579983  | -0.486764 | 2.332620  | H | -3.697902 | 0.678059  | 1.286356  |
| H | 2.295066  | 1.245857  | 2.163072  | W | 0.539370  | 2.114333  | -1.317334 |
| C | -0.465361 | 1.149467  | 2.443748  | C | 0.502060  | 3.701947  | -2.534089 |
| H | -1.474076 | 0.994529  | 2.068456  | O | 0.483653  | 4.609929  | -3.238443 |
| H | -0.512941 | 1.180028  | 3.534593  | C | -1.269886 | 2.694672  | -0.517157 |
| H | -0.120953 | 2.127351  | 2.106397  | O | -2.270715 | 3.055732  | -0.105845 |
| C | -0.025446 | -1.305987 | 2.558044  | C | 1.545235  | 3.238856  | 0.077466  |
| H | -0.122790 | -1.241451 | 3.644593  | O | 2.107333  | 3.895944  | 0.824846  |
| H | -1.000946 | -1.558894 | 2.143778  | C | 2.332097  | 1.520207  | -2.123732 |
| H | 0.661436  | -2.123061 | 2.339774  | O | 3.327393  | 1.187476  | -2.574187 |
| N | -2.328432 | -0.381420 | 0.023360  | C | -0.464837 | 1.013203  | -2.735085 |
| C | -2.549035 | -1.230718 | -0.947965 | O | -1.018507 | 0.415305  | -3.534444 |
| N | -3.864524 | -1.439514 | -1.147504 | B | 0.710025  | -1.703939 | -0.556187 |
| C | -4.531887 | -0.667188 | -0.238984 | H | 1.957047  | -0.548672 | 0.016049  |
| C | -3.564949 | -0.021244 | 0.476120  | H | 0.696985  | -2.675663 | 0.125271  |
| C | -4.457971 | -2.300953 | -2.144609 | H | 0.964967  | -1.767215 | -1.717420 |
| H | -5.049793 | -1.720931 | -2.849888 |   |           |           |           |

6'

$E = -1425.0923653315$  au

$ZPE = 0.30843458$  au

$G_{\text{corr}} = 0.25447001$  au

|   |           |           |           |   |           |           |           |
|---|-----------|-----------|-----------|---|-----------|-----------|-----------|
| P | 0.100183  | -0.042704 | 0.185659  | H | 5.986821  | -1.125330 | -1.893534 |
| C | 0.010731  | 0.258861  | 2.039114  | H | 4.983352  | -1.961680 | -3.088314 |
| C | 1.391103  | 0.643620  | 2.565100  | H | 2.601857  | -1.810498 | -2.438907 |
| H | 1.342634  | 0.825135  | 3.641677  | H | 5.331042  | -2.326922 | 0.710916  |
| H | 2.127474  | -0.144212 | 2.401529  | H | 2.769800  | -2.267803 | 1.721806  |
| H | 1.772950  | 1.550006  | 2.095888  | W | 0.987951  | 1.877725  | -1.318867 |
| C | -0.983224 | 1.392157  | 2.289423  | C | 1.613960  | 3.252188  | -2.628129 |
| H | -1.988972 | 1.119803  | 1.964377  | O | 1.968402  | 4.033977  | -3.395290 |
| H | -1.030516 | 1.619258  | 3.357716  | C | -0.981782 | 2.414582  | -1.571224 |
| H | -0.705985 | 2.309641  | 1.771113  | O | -2.079953 | 2.705295  | -1.685876 |
| C | -0.479864 | -0.998661 | 2.754510  | C | 1.162832  | 3.324905  | 0.127280  |
| H | -0.607467 | -0.790378 | 3.820267  | O | 1.286168  | 4.186556  | 0.869699  |
| H | -1.441484 | -1.337778 | 2.365248  | C | 2.915326  | 1.312312  | -0.907274 |
| H | 0.224021  | -1.824826 | 2.660469  | O | 3.998520  | 1.035463  | -0.660845 |
| N | 2.258587  | -1.982709 | -0.339901 | C | 0.848434  | 0.566233  | -2.891249 |
| C | 2.986487  | -1.923325 | -1.439759 | O | 0.784389  | -0.120125 | -3.804274 |
| N | 4.275636  | -2.053575 | -1.138126 | B | 0.703125  | -1.871295 | -0.268772 |
| C | 4.382606  | -2.202068 | 0.217952  | H | 0.255312  | -2.066590 | -1.375219 |
| C | 3.118649  | -2.163161 | 0.709377  | H | 0.284125  | -2.676149 | 0.526257  |
| C | 5.377725  | -2.006718 | -2.077884 | H | -1.279840 | -0.220189 | -0.053580 |
| H | 5.989345  | -2.899007 | -1.975440 |   |           |           |           |

7'

$E = -1132.8596592581$  au

$ZPE = 0.16829023$  au

$G_{\text{corr}} = 0.12153372$  au

|   |           |           |          |   |           |           |          |
|---|-----------|-----------|----------|---|-----------|-----------|----------|
| P | -0.465712 | 0.483009  | 0.364403 | H | 0.623243  | -1.272496 | 3.412603 |
| C | -0.126008 | 0.355497  | 2.207852 | H | -0.063778 | -1.821948 | 1.884462 |
| C | 0.534500  | -1.033513 | 2.347992 | H | 1.533957  | -1.058112 | 1.914027 |

|   |           |           |           |   |           |           |           |
|---|-----------|-----------|-----------|---|-----------|-----------|-----------|
| C | 0.764135  | 1.434288  | 2.822725  | O | 3.247370  | 2.780405  | -3.205602 |
| H | 0.319840  | 2.424638  | 2.714838  | C | 1.345868  | 3.232748  | 0.085044  |
| H | 0.885813  | 1.243476  | 3.893700  | O | 1.438638  | 4.190241  | 0.698897  |
| H | 1.757126  | 1.454869  | 2.378604  | C | 2.796761  | 0.748829  | 0.056247  |
| C | -1.486756 | 0.343856  | 2.925089  | O | 3.675376  | 0.340778  | 0.662899  |
| H | -1.339169 | 0.173908  | 3.996210  | C | 1.125939  | -0.235194 | -2.195389 |
| H | -2.006592 | 1.297167  | 2.807217  | O | 1.069474  | -1.179751 | -2.832540 |
| H | -2.135194 | -0.444112 | 2.539447  | C | -0.389892 | 2.225402  | -2.144523 |
| W | 1.214305  | 1.495812  | -1.046389 | O | -1.273834 | 2.610988  | -2.754867 |
| C | 2.524867  | 2.324637  | -2.448266 |   |           |           |           |

**8'**

$E = -1637.5554985189$  au

$ZPE = 0.28303342$  au

$G_{\text{corr}} = 0.23011308$  au

|   |           |           |           |   |           |           |           |
|---|-----------|-----------|-----------|---|-----------|-----------|-----------|
| P | 0.100183  | -0.042704 | 0.185659  | H | 5.986821  | -1.125330 | -1.893534 |
| C | 0.010731  | 0.258861  | 2.039114  | H | 4.983352  | -1.961680 | -3.088314 |
| C | 1.391103  | 0.643620  | 2.565100  | H | 2.601857  | -1.810498 | -2.438907 |
| H | 1.342634  | 0.825135  | 3.641677  | H | 5.331042  | -2.326922 | 0.710916  |
| H | 2.127474  | -0.144212 | 2.401529  | H | 2.769800  | -2.267803 | 1.721806  |
| H | 1.772950  | 1.550006  | 2.095888  | W | 0.987951  | 1.877725  | -1.318867 |
| C | -0.983224 | 1.392157  | 2.289423  | C | 1.613960  | 3.252188  | -2.628129 |
| H | -1.988972 | 1.119803  | 1.964377  | O | 1.968402  | 4.033977  | -3.395290 |
| H | -1.030516 | 1.619258  | 3.357716  | C | -0.981782 | 2.414582  | -1.571224 |
| H | -0.705985 | 2.309641  | 1.771113  | O | -2.079953 | 2.705295  | -1.685876 |
| C | -0.479864 | -0.998661 | 2.754510  | C | 1.162832  | 3.324905  | 0.127280  |
| H | -0.607467 | -0.790378 | 3.820267  | O | 1.286168  | 4.186556  | 0.869699  |
| H | -1.441484 | -1.337778 | 2.365248  | C | 2.915326  | 1.312312  | -0.907274 |
| H | 0.224021  | -1.824826 | 2.660469  | O | 3.998520  | 1.035463  | -0.660845 |
| N | 2.258587  | -1.982709 | -0.339901 | C | 0.848434  | 0.566233  | -2.891249 |
| C | 2.986487  | -1.923325 | -1.439759 | O | 0.784389  | -0.120125 | -3.804274 |
| N | 4.275636  | -2.053575 | -1.138126 | B | 0.703125  | -1.871295 | -0.268772 |
| C | 4.382606  | -2.202068 | 0.217952  | H | 0.255312  | -2.066590 | -1.375219 |
| C | 3.118649  | -2.163161 | 0.709377  | H | 0.284125  | -2.676149 | 0.526257  |
| C | 5.377725  | -2.006718 | -2.077884 | H | -1.279840 | -0.220189 | -0.053580 |
| H | 5.989345  | -2.899007 | -1.975440 |   |           |           |           |

**(8'→6')<sup>‡</sup>**

$E = -1903.0102401361$  au

$ZPE = 0.38562048$  au

$G_{\text{corr}} = 0.32409685$  au

$\nu = -337.45$  cm<sup>-1</sup>

|   |           |           |          |   |           |           |           |
|---|-----------|-----------|----------|---|-----------|-----------|-----------|
| P | -0.003611 | -0.126805 | 0.297716 | H | 0.577871  | -1.920017 | 2.667982  |
| C | 0.474197  | 0.184218  | 2.090700 | W | 0.427098  | 1.708917  | -1.479336 |
| C | 1.971244  | 0.432577  | 2.242679 | C | 0.575159  | 3.044208  | -2.958298 |
| H | 2.192532  | 0.729586  | 3.270730 | O | 0.644080  | 3.806687  | -3.818265 |
| H | 2.565780  | -0.455215 | 2.032589 | C | -1.354388 | 2.530936  | -0.864472 |
| H | 2.326771  | 1.225339  | 1.585407 | O | -2.343156 | 2.982961  | -0.513758 |
| C | -0.292957 | 1.426955  | 2.545638 | C | 1.446260  | 3.024934  | -0.279437 |
| H | -1.372774 | 1.286673  | 2.469983 | O | 2.019707  | 3.801650  | 0.334836  |
| H | -0.059577 | 1.643631  | 3.591100 | C | 2.219094  | 0.876130  | -2.029162 |
| H | -0.030292 | 2.309859  | 1.962377 | O | 3.226271  | 0.449601  | -2.364128 |
| C | 0.050819  | -1.007935 | 2.946755 | C | -0.564845 | 0.453331  | -2.771924 |
| H | 0.266757  | -0.806426 | 3.999398 | O | -1.104978 | -0.213754 | -3.525932 |
| H | -1.019509 | -1.205993 | 2.861874 | B | 0.321718  | -1.983148 | -0.256261 |

|   |           |           |           |   |           |           |           |
|---|-----------|-----------|-----------|---|-----------|-----------|-----------|
| H | 0.309677  | -2.878341 | 0.532377  | N | -1.945548 | -2.414743 | -0.597851 |
| H | -1.393445 | -0.155682 | 0.515619  | C | -2.392274 | -2.860541 | -1.744024 |
| H | 0.408466  | -2.168998 | -1.432002 | N | -3.694821 | -3.192542 | -1.670344 |
| S | 2.774604  | -1.956797 | -0.167191 | C | -4.102178 | -2.941887 | -0.389498 |
| C | 3.034303  | -2.981552 | -1.625676 | C | -3.003329 | -2.460877 | 0.261345  |
| H | 4.060601  | -3.342533 | -1.655736 | C | -4.512679 | -3.709873 | -2.744264 |
| H | 2.341648  | -3.821510 | -1.626247 | H | -5.344507 | -3.038931 | -2.948236 |
| H | 2.847380  | -2.368523 | -2.503771 | H | -4.902318 | -4.692929 | -2.488262 |
| C | 3.056869  | -3.195176 | 1.111988  | H | -3.907627 | -3.797527 | -3.642393 |
| H | 2.910192  | -2.723986 | 2.081731  | H | -1.815530 | -2.961374 | -2.650258 |
| H | 2.350935  | -4.017456 | 1.008831  | H | -5.112070 | -3.122750 | -0.061389 |
| H | 4.077283  | -3.569566 | 1.055759  | H | -2.918886 | -2.148355 | 1.290344  |

(7'→9')<sup>‡</sup>

$E = -1424.9888177124$  au

$ZPE = 0.30575145$  au

$G_{\text{corr}} = 0.25188025$  au

$\nu = -170.67$  cm<sup>-1</sup>

|   |           |           |           |   |           |           |           |
|---|-----------|-----------|-----------|---|-----------|-----------|-----------|
| P | 0.147428  | -0.002640 | -0.008738 | H | -4.478239 | 0.251454  | 0.314271  |
| C | 0.353567  | -0.354722 | 1.834029  | H | -2.943479 | 0.774377  | 1.038989  |
| C | 1.567705  | 0.509371  | 2.212645  | H | -1.453378 | -2.027386 | 0.366832  |
| H | 1.889149  | 0.239631  | 3.221935  | H | -3.925029 | 0.234030  | -2.093735 |
| H | 2.420754  | 0.344135  | 1.550451  | H | -2.141965 | -1.192247 | -3.629684 |
| H | 1.337013  | 1.573661  | 2.217454  | W | -0.325834 | 2.345432  | -0.775934 |
| C | -0.812930 | -0.029412 | 2.756099  | C | -0.175516 | 4.178103  | -1.623731 |
| H | -1.647702 | -0.715307 | 2.609443  | O | -0.062367 | 5.210979  | -2.105489 |
| H | -0.502624 | -0.131874 | 3.799752  | C | -2.353236 | 2.599002  | -1.064079 |
| H | -1.182248 | 0.985421  | 2.621323  | O | -3.451625 | 2.878904  | -1.211169 |
| C | 0.751616  | -1.823099 | 2.010724  | C | -0.614010 | 3.164229  | 1.083885  |
| H | 1.013852  | -2.015046 | 3.054769  | O | -0.786982 | 3.673485  | 2.091909  |
| H | -0.056613 | -2.512874 | 1.759848  | C | 1.709449  | 2.524949  | -0.516726 |
| H | 1.610005  | -2.084728 | 1.392251  | O | 2.829374  | 2.700912  | -0.396695 |
| N | -1.363454 | -1.740598 | -1.746003 | C | -0.075921 | 1.510482  | -2.649566 |
| C | -1.647909 | -1.367421 | -0.468603 | O | 0.072805  | 1.079394  | -3.693866 |
| N | -2.788840 | -0.611505 | -0.512999 | B | -0.201767 | -2.728777 | -2.163866 |
| C | -3.093129 | -0.376931 | -1.787231 | H | 0.099716  | -3.373801 | -1.183619 |
| C | -2.193966 | -1.104359 | -2.557855 | H | -0.642949 | -3.422601 | -3.056828 |
| C | -3.491826 | -0.071903 | 0.630392  | H | 0.731513  | -2.058236 | -2.554411 |
| H | -3.597281 | -0.839982 | 1.390771  |   |           |           |           |

9'

$E = -1424.9886403826$  au

$ZPE = 0.30629703$  au

$G_{\text{corr}} = 0.25210872$  au

|   |           |           |          |   |           |           |           |
|---|-----------|-----------|----------|---|-----------|-----------|-----------|
| P | 0.054772  | -0.042519 | 0.022398 | H | 0.916211  | -2.035871 | 3.101546  |
| C | 0.284794  | -0.372970 | 1.869670 | H | -0.221661 | -2.510728 | 1.858825  |
| C | 1.536042  | 0.450787  | 2.206717 | H | 1.450905  | -2.163350 | 1.421716  |
| H | 1.856090  | 0.215959  | 3.224831 | N | -1.288241 | -1.696714 | -1.781391 |
| H | 2.371933  | 0.223347  | 1.541708 | C | -1.475745 | -1.258245 | -0.457712 |
| H | 1.349052  | 1.523654  | 2.164469 | N | -2.717911 | -0.584134 | -0.492171 |
| C | -0.838823 | 0.014399  | 2.822471 | C | -3.109119 | -0.446050 | -1.730456 |
| H | -1.701672 | -0.644094 | 2.722672 | C | -2.208209 | -1.177505 | -2.539130 |
| H | -0.495576 | -0.072737 | 3.857443 | C | -3.408382 | -0.055554 | 0.664335  |
| H | -1.174331 | 1.040067  | 2.675309 | H | -3.510847 | -0.839281 | 1.409758  |
| C | 0.626044  | -1.852741 | 2.063151 | H | -4.393561 | 0.281570  | 0.359746  |

|   |           |           |           |   |           |           |           |
|---|-----------|-----------|-----------|---|-----------|-----------|-----------|
| H | -2.846984 | 0.776690  | 1.080351  | O | -0.710997 | 3.732509  | 2.045589  |
| H | -1.419859 | -2.040607 | 0.297842  | C | 1.725649  | 2.481629  | -0.598839 |
| H | -3.989285 | 0.101980  | -2.024579 | O | 2.854624  | 2.609199  | -0.502439 |
| H | -2.250261 | -1.330416 | -3.604882 | C | -0.134883 | 1.506918  | -2.679627 |
| W | -0.325213 | 2.364782  | -0.816103 | O | -0.032751 | 1.056473  | -3.723753 |
| C | -0.202796 | 4.178449  | -1.662192 | B | -0.098114 | -2.612631 | -2.242108 |
| O | -0.116271 | 5.215991  | -2.149191 | H | 0.015446  | -3.503534 | -1.428327 |
| C | -2.347734 | 2.566676  | -1.064100 | H | -0.371316 | -3.009389 | -3.352973 |
| O | -3.461082 | 2.803592  | -1.203002 | H | 0.896265  | -1.915208 | -2.239020 |
| C | -0.563080 | 3.212112  | 1.038397  |   |           |           |           |

$(9' \rightarrow 10')^\ddagger$

$E = -1424.9840433059$  au

$ZPE = 0.30378668$  au

$G_{\text{corr}} = 0.25075411$  au

$\nu = -458.10$  cm<sup>-1</sup>

|   |           |           |           |   |           |           |           |
|---|-----------|-----------|-----------|---|-----------|-----------|-----------|
| P | -0.140698 | -0.040111 | 0.045963  | H | -4.618275 | 0.037344  | 0.326328  |
| C | 0.279365  | -0.382226 | 1.842760  | H | -3.204769 | 0.652749  | 1.188810  |
| C | 1.568972  | 0.396579  | 2.121688  | H | -1.580133 | -2.047571 | 0.356417  |
| H | 1.919436  | 0.157518  | 3.128355  | H | -4.048856 | 0.068469  | -2.087488 |
| H | 2.368164  | 0.130234  | 1.427251  | H | -2.286549 | -1.346720 | -3.594103 |
| H | 1.423413  | 1.474808  | 2.075022  | W | -0.239761 | 2.310022  | -0.867337 |
| C | -0.812393 | 0.052282  | 2.817729  | C | -0.116851 | 4.115769  | -1.751157 |
| H | -1.708695 | -0.561310 | 2.723927  | O | -0.042012 | 5.143373  | -2.255340 |
| H | -0.452672 | -0.060135 | 3.844476  | C | -2.284519 | 2.500654  | -0.987021 |
| H | -1.101484 | 1.094017  | 2.681749  | O | -3.407886 | 2.702267  | -1.043772 |
| C | 0.570761  | -1.875448 | 2.016717  | C | -0.344799 | 3.227966  | 0.967867  |
| H | 0.931587  | -2.061623 | 3.031418  | O | -0.416420 | 3.786914  | 1.961627  |
| H | -0.314483 | -2.498612 | 1.882140  | C | 1.819323  | 2.317753  | -0.756124 |
| H | 1.334806  | -2.222680 | 1.320711  | O | 2.957843  | 2.365989  | -0.711006 |
| N | -1.334968 | -1.717168 | -1.739402 | C | -0.175180 | 1.437329  | -2.735659 |
| C | -1.575339 | -1.263577 | -0.405290 | O | -0.142696 | 1.002329  | -3.789293 |
| N | -2.815005 | -0.577985 | -0.478342 | B | 0.014543  | -2.274158 | -2.054438 |
| C | -3.175045 | -0.474099 | -1.767413 | H | 0.308870  | -3.227246 | -1.367719 |
| C | -2.277291 | -1.189117 | -2.528782 | H | 0.224620  | -2.379813 | -3.235895 |
| C | -3.615523 | -0.207365 | 0.664365  | H | 0.713186  | -1.328422 | -1.469716 |
| H | -3.679462 | -1.046478 | 1.356923  |   |           |           |           |

$10'$

$E = -1425.0437736487$  au

$ZPE = 0.30768990$  au

$G_{\text{corr}} = 0.25522523$  au

|   |           |           |          |   |           |           |           |
|---|-----------|-----------|----------|---|-----------|-----------|-----------|
| P | 0.651402  | -0.157914 | 0.010160 | H | 1.877984  | -2.429604 | 1.477188  |
| C | 1.010529  | -0.453395 | 1.823128 | N | -0.617315 | -1.726464 | -1.850527 |
| C | 2.358770  | 0.211534  | 2.110169 | C | -0.787492 | -1.289651 | -0.461160 |
| H | 2.627624  | 0.044892  | 3.155654 | N | -2.052180 | -0.576539 | -0.422951 |
| H | 3.157992  | -0.206422 | 1.495122 | C | -2.471772 | -0.468628 | -1.759188 |
| H | 2.337459  | 1.288189  | 1.947377 | C | -1.648090 | -1.105212 | -2.582460 |
| C | -0.081229 | 0.166586  | 2.690018 | C | -3.054048 | -1.064239 | 0.507807  |
| H | -1.037693 | -0.342132 | 2.570030 | H | -3.368803 | -2.093424 | 0.300676  |
| H | 0.196188  | 0.086601  | 3.743309 | H | -3.929860 | -0.419389 | 0.455082  |
| H | -0.238002 | 1.222161  | 2.469510 | H | -2.679006 | -1.017595 | 1.528197  |
| C | 1.130938  | -1.950379 | 2.111845 | H | -0.795160 | -2.148532 | 0.212680  |
| H | 1.438981  | -2.094034 | 3.150068 | H | -3.363914 | 0.084057  | -2.008589 |
| H | 0.188011  | -2.483212 | 1.987124 | H | -1.682041 | -1.187692 | -3.655792 |

|   |           |          |           |   |          |           |           |
|---|-----------|----------|-----------|---|----------|-----------|-----------|
| W | 0.643069  | 2.195614 | -0.969130 | O | 3.827937 | 1.984667  | -1.077072 |
| C | 0.721004  | 3.982040 | -1.876437 | C | 0.521998 | 1.341806  | -2.840955 |
| O | 0.773732  | 4.998253 | -2.408621 | O | 0.494612 | 0.936359  | -3.907515 |
| C | -1.408996 | 2.383068 | -0.807862 | B | 0.344445 | -2.608986 | -2.332236 |
| O | -2.526106 | 2.593912 | -0.711595 | H | 1.112885 | -3.111097 | -1.569106 |
| C | 0.790026  | 3.198901 | 0.814512  | H | 0.372469 | -2.846126 | -3.500681 |
| O | 0.874610  | 3.822271 | 1.769365  | H | 1.690180 | -0.945017 | -0.528452 |
| C | 2.687971  | 2.053498 | -1.045741 |   |          |           |           |

(10'→11')<sup>‡</sup>

$E = -1425.0169523139$  au

$ZPE = 0.30551003$  au

$G_{\text{corr}} = 0.25202621$  au

$\nu = -35.50$  cm<sup>-1</sup>

|   |           |           |           |   |           |           |           |
|---|-----------|-----------|-----------|---|-----------|-----------|-----------|
| P | 0.579099  | -0.109992 | 0.288681  | H | -3.902631 | -1.323754 | 0.627012  |
| C | 1.056380  | -0.195778 | 2.115544  | H | -2.296337 | -0.692439 | 1.092908  |
| C | 2.422466  | 0.417680  | 2.403630  | H | -0.593440 | -2.663615 | -0.602049 |
| H | 2.679811  | 0.308622  | 3.462769  | H | -3.928102 | -0.361380 | -1.733418 |
| H | 3.208082  | -0.065911 | 1.820633  | H | -2.288570 | -0.673882 | -3.918326 |
| H | 2.442886  | 1.481616  | 2.168032  | W | 0.858699  | 2.227707  | -0.887143 |
| C | -0.015883 | 0.523778  | 2.929222  | C | 1.024251  | 3.888661  | -1.975229 |
| H | -1.000533 | 0.073651  | 2.786251  | O | 1.130167  | 4.840972  | -2.621098 |
| H | 0.214536  | 0.474241  | 3.997309  | C | -1.189514 | 2.254266  | -0.906454 |
| H | -0.094429 | 1.577185  | 2.659533  | O | -2.334904 | 2.236653  | -0.885738 |
| C | 1.075385  | -1.674086 | 2.511617  | C | 0.851922  | 3.393750  | 0.805410  |
| H | 1.310823  | -1.786840 | 3.574819  | O | 0.862643  | 4.090173  | 1.714733  |
| H | 0.108196  | -2.148866 | 2.333836  | C | 2.884352  | 1.961401  | -0.693603 |
| H | 1.827172  | -2.230059 | 1.947763  | O | 4.007694  | 1.776526  | -0.578694 |
| N | -1.090697 | -1.778135 | -2.500044 | C | 0.924086  | 1.094935  | -2.578925 |
| C | -1.240866 | -2.032640 | -1.182326 | O | 0.987115  | 0.445033  | -3.524913 |
| N | -2.398234 | -1.546503 | -0.785439 | B | 0.006401  | -2.233196 | -3.320618 |
| C | -2.988736 | -0.874474 | -1.840983 | H | 0.890406  | -2.812039 | -2.784689 |
| C | -2.186307 | -1.025402 | -2.907040 | H | -0.059125 | -2.052806 | -4.487957 |
| C | -2.832538 | -1.499669 | 0.590990  | H | 1.694609  | -0.844761 | -0.199546 |
| H | -2.606335 | -2.440623 | 1.083542  |   |           |           |           |

11'

$E = -1425.0189246255$  au

$ZPE = 0.30591790$  au

$G_{\text{corr}} = 0.24995982$  au

|   |           |           |           |   |           |           |           |
|---|-----------|-----------|-----------|---|-----------|-----------|-----------|
| P | 0.099475  | -0.120174 | 0.594817  | C | -1.994487 | -1.763818 | -1.481231 |
| C | 0.446244  | 0.049731  | 2.444713  | N | -3.131108 | -1.306196 | -1.012109 |
| C | 1.715132  | 0.835962  | 2.755164  | C | -3.884598 | -0.812076 | -2.060298 |
| H | 1.889648  | 0.880890  | 3.835646  | C | -3.160846 | -0.988581 | -3.181028 |
| H | 2.590944  | 0.372067  | 2.297951  | C | -3.508896 | -1.305662 | 0.389564  |
| H | 1.657385  | 1.860343  | 2.388822  | H | -4.037154 | -2.223385 | 0.633958  |
| C | -0.761569 | 0.721734  | 3.092933  | H | -4.149848 | -0.451871 | 0.583573  |
| H | -1.676864 | 0.150469  | 2.921465  | H | -2.600049 | -1.218519 | 0.982846  |
| H | -0.622954 | 0.804492  | 4.174843  | H | -1.201650 | -2.183886 | -0.884721 |
| H | -0.926077 | 1.727464  | 2.704823  | H | -4.858568 | -0.381371 | -1.908566 |
| C | 0.588701  | -1.366263 | 3.009043  | H | -3.377586 | -0.736666 | -4.204047 |
| H | 0.752729  | -1.336693 | 4.091197  | W | 0.161665  | 2.142722  | -0.774850 |
| H | -0.306390 | -1.962973 | 2.823514  | C | 0.208977  | 3.740572  | -1.964744 |
| H | 1.435970  | -1.891227 | 2.562974  | O | 0.247985  | 4.656642  | -2.667461 |
| N | -1.969826 | -1.593188 | -2.812630 | C | -1.877360 | 2.044804  | -0.727660 |



|   |           |          |           |
|---|-----------|----------|-----------|
| O | -3.019910 | 1.961767 | -0.665064 |
| C | 0.101796  | 3.450927 | 0.818673  |
| O | 0.067428  | 4.237181 | 1.649324  |
| C | 2.199865  | 1.967242 | -0.574262 |
| O | 3.325885  | 1.821297 | -0.438435 |
| C | 0.228896  | 0.974113 | -2.428779 |

|   |           |           |           |
|---|-----------|-----------|-----------|
| O | 0.269431  | 0.337108  | -3.390050 |
| B | -0.848094 | -1.939441 | -3.672713 |
| H | 0.075419  | -2.483312 | -3.170189 |
| H | -0.973232 | -1.765683 | -4.836168 |
| H | 1.346617  | -0.714039 | 0.256109  |

(11'→6')<sup>‡</sup>

$E = -1425.0162018357$  au

$ZPE = 0.30552250$  au

$G_{\text{corr}} = 0.25170287$  au

$\nu = -57.07$  cm<sup>-1</sup>

|   |           |           |           |
|---|-----------|-----------|-----------|
| P | -0.440408 | -0.665726 | 0.247793  |
| C | -0.299928 | 0.217695  | 1.916192  |
| C | 1.178837  | 0.532148  | 2.151379  |
| H | 1.321401  | 1.045089  | 3.108183  |
| H | 1.783178  | -0.377868 | 2.184354  |
| H | 1.586998  | 1.172808  | 1.367494  |
| C | -1.085277 | 1.523089  | 1.983515  |
| H | -2.152234 | 1.362122  | 1.838499  |
| H | -0.952846 | 2.007255  | 2.957290  |
| H | -0.752179 | 2.225402  | 1.217193  |
| C | -0.779894 | -0.745297 | 2.998945  |
| H | -0.662408 | -0.303341 | 3.992770  |
| H | -1.832482 | -1.001678 | 2.873991  |
| H | -0.212108 | -1.678861 | 2.980493  |
| N | 1.997767  | -3.281235 | 0.565327  |
| C | 1.469839  | -3.276461 | -0.668804 |
| N | 0.591118  | -4.242173 | -0.764399 |
| C | 0.492709  | -4.882393 | 0.460105  |
| C | 1.368158  | -4.281744 | 1.285347  |
| C | -0.157430 | -4.600505 | -1.955198 |
| H | -1.221275 | -4.488416 | -1.770423 |

|   |           |           |           |
|---|-----------|-----------|-----------|
| H | 0.058308  | -5.632804 | -2.216498 |
| H | 0.139170  | -3.953621 | -2.773484 |
| H | 1.753891  | -2.605427 | -1.460741 |
| H | -0.179596 | -5.706812 | 0.619285  |
| H | 1.605998  | -4.475962 | 2.316336  |
| W | -2.939288 | -0.983632 | -0.578231 |
| C | -4.716213 | -1.294100 | -1.418727 |
| O | -5.740435 | -1.469422 | -1.926386 |
| C | -2.813210 | 1.005762  | -1.072290 |
| O | -2.693769 | 2.116767  | -1.319436 |
| C | -2.051423 | -1.467914 | -2.357921 |
| O | -1.573289 | -1.730337 | -3.367063 |
| C | -2.762611 | -2.882198 | 0.142181  |
| O | -2.633245 | -3.932654 | 0.588401  |
| C | -3.936117 | -0.495873 | 1.144913  |
| O | -4.557730 | -0.240134 | 2.073952  |
| B | 2.944879  | -2.300356 | 1.047275  |
| H | -0.008962 | 0.439885  | -0.537689 |
| H | 3.285195  | -2.373030 | 2.178832  |
| H | 3.359072  | -1.505756 | 0.274528  |

12'

$E = -1425.0284755813$  au

$ZPE = 0.30604678$  au

$G_{\text{corr}} = 0.25121681$  au

0.25121681

|   |           |           |           |
|---|-----------|-----------|-----------|
| P | 1.180780  | 0.028740  | -0.053714 |
| C | 1.048361  | -0.317088 | 1.798719  |
| C | 2.208865  | 0.460906  | 2.425181  |
| H | 2.242581  | 0.270684  | 3.501160  |
| H | 3.171111  | 0.156574  | 2.007901  |
| H | 2.111590  | 1.537504  | 2.286957  |
| C | -0.275058 | 0.102664  | 2.424512  |
| H | -1.115638 | -0.432312 | 1.977054  |
| H | -0.279608 | -0.119876 | 3.495883  |
| H | -0.463305 | 1.168640  | 2.307499  |
| C | 1.274889  | -1.810398 | 2.041188  |
| H | 1.309146  | -2.016089 | 3.115175  |
| H | 0.472635  | -2.416040 | 1.618278  |
| H | 2.214321  | -2.151271 | 1.604133  |
| N | -1.941763 | -1.385488 | -1.370160 |
| C | -2.904323 | -1.577726 | -0.477073 |

|   |           |           |           |
|---|-----------|-----------|-----------|
| N | -4.045414 | -1.102590 | -0.947303 |
| C | -3.818233 | -0.581846 | -2.196744 |
| C | -2.501950 | -0.759479 | -2.456077 |
| C | -5.319254 | -1.104161 | -0.252906 |
| H | -6.063114 | -1.621041 | -0.852703 |
| H | -5.640080 | -0.081284 | -0.074693 |
| H | -5.207233 | -1.615562 | 0.697739  |
| H | -2.780333 | -2.051377 | 0.482570  |
| H | -4.602211 | -0.138291 | -2.785302 |
| H | -1.927005 | -0.506808 | -3.328765 |
| W | 0.375141  | 2.398174  | -0.797835 |
| C | -0.167372 | 4.160749  | -1.566251 |
| O | -0.488780 | 5.170329  | -2.019797 |
| C | -1.558807 | 1.894293  | -0.343373 |
| O | -2.631626 | 1.617752  | -0.053381 |
| C | 0.526032  | 3.339618  | 1.019470  |
| O | 0.592366  | 3.933064  | 1.996064  |

|   |          |          |           |   |           |           |           |
|---|----------|----------|-----------|---|-----------|-----------|-----------|
| C | 2.368985 | 2.788117 | -1.113714 | B | -0.475781 | -1.767649 | -1.195375 |
| O | 3.480660 | 2.998555 | -1.274320 | H | -0.305194 | -2.724233 | -0.504214 |
| C | 0.234075 | 1.610911 | -2.686952 | H | 0.154843  | -1.654117 | -2.198451 |
| O | 0.167072 | 1.223353 | -3.762075 | H | -0.098244 | -0.733397 | -0.331358 |

(12'→6')<sup>‡</sup>

$E = -1425.0277897509$  au

$ZPE = 0.30591436$  au

$G_{\text{corr}} = 0.25322195$  au

$\nu = -169.93$  cm<sup>-1</sup>

|   |           |           |           |   |           |           |           |
|---|-----------|-----------|-----------|---|-----------|-----------|-----------|
| P | 0.935280  | 0.106950  | -0.095528 | H | -5.798186 | -1.301391 | 0.247620  |
| C | 0.765735  | -0.214620 | 1.761432  | H | -4.955645 | -2.810460 | 0.632819  |
| C | 2.077785  | 0.283700  | 2.371748  | H | -2.509606 | -2.658123 | 0.280396  |
| H | 2.070412  | 0.124762  | 3.453078  | H | -4.885967 | -0.328489 | -2.286798 |
| H | 2.938862  | -0.250048 | 1.964575  | H | -2.230184 | 0.050313  | -2.916181 |
| H | 2.236385  | 1.348614  | 2.199754  | W | 0.695684  | 2.613513  | -0.876414 |
| C | -0.419999 | 0.503766  | 2.394644  | C | 0.560346  | 4.452549  | -1.625132 |
| H | -1.366614 | 0.166251  | 1.966970  | O | 0.474857  | 5.514862  | -2.066333 |
| H | -0.455942 | 0.307596  | 3.470680  | C | -1.305910 | 2.524861  | -0.432147 |
| H | -0.364163 | 1.582764  | 2.257463  | O | -2.418713 | 2.451355  | -0.177005 |
| C | 0.645821  | -1.715831 | 2.020763  | C | 1.071536  | 3.492354  | 0.940462  |
| H | 0.679191  | -1.911396 | 3.096431  | O | 1.276007  | 4.053698  | 1.916696  |
| H | -0.296095 | -2.121042 | 1.648498  | C | 2.718638  | 2.527841  | -1.229582 |
| H | 1.455363  | -2.275805 | 1.551089  | O | 3.844180  | 2.467759  | -1.417870 |
| N | -1.944090 | -1.334497 | -1.301214 | C | 0.327046  | 1.899702  | -2.763654 |
| C | -2.787362 | -1.969543 | -0.500257 | O | 0.119323  | 1.558269  | -3.836431 |
| N | -4.031358 | -1.633789 | -0.809377 | B | -0.397958 | -1.431856 | -1.246929 |
| C | -3.993006 | -0.743958 | -1.853184 | H | -0.050477 | -2.430746 | -0.699797 |
| C | -2.686263 | -0.559533 | -2.156241 | H | 0.077601  | -1.150558 | -2.303449 |
| C | -5.233563 | -2.131874 | -0.167295 | H | -0.471141 | -0.202391 | -0.365368 |
| H | -5.844683 | -2.663026 | -0.891989 |   |           |           |           |

(9'→13')<sup>‡</sup>

$E = -1424.9758030270$  au

$ZPE = 0.30547683$  au

$G_{\text{corr}} = 0.25129288$  au

$\nu = -168.58$  cm<sup>-1</sup>

|   |           |           |           |   |           |           |           |
|---|-----------|-----------|-----------|---|-----------|-----------|-----------|
| P | -0.060892 | -0.695351 | 0.293321  | C | -3.080189 | -0.013665 | -0.782433 |
| C | 0.080854  | -0.471176 | 2.141591  | C | -3.393504 | -3.054453 | 0.564755  |
| C | 1.447441  | 0.173427  | 2.384905  | H | -3.831450 | -3.295884 | -0.410746 |
| H | 1.590305  | 0.325905  | 3.457387  | H | -4.195928 | -3.031861 | 1.301183  |
| H | 2.267349  | -0.453158 | 2.029693  | H | -2.709645 | -3.853244 | 0.848744  |
| H | 1.531598  | 1.148857  | 1.902211  | H | -1.268561 | -2.605403 | -0.728784 |
| C | -1.028218 | 0.450234  | 2.640006  | H | -4.347569 | -0.409103 | 0.940502  |
| H | -2.013443 | 0.012949  | 2.487787  | H | -3.479154 | 0.884896  | -1.227840 |
| H | -0.899502 | 0.624614  | 3.710804  | W | 0.240642  | 2.615864  | -2.333009 |
| H | -1.007616 | 1.420645  | 2.142966  | C | 1.336662  | 4.222587  | -2.681081 |
| C | 0.000047  | -1.832394 | 2.830668  | O | 1.965951  | 5.164142  | -2.885179 |
| H | 0.116037  | -1.703575 | 3.910422  | C | -1.387051 | 3.589317  | -3.142027 |
| H | -0.962391 | -2.311508 | 2.652513  | O | -2.266710 | 4.157288  | -3.593121 |
| H | 0.788263  | -2.506729 | 2.492526  | C | -0.241341 | 3.345915  | -0.471480 |
| N | -1.989734 | -0.673482 | -1.363978 | O | -0.489673 | 3.770633  | 0.558058  |
| C | -1.588966 | -1.644625 | -0.323350 | C | 1.879565  | 1.668733  | -1.521658 |
| N | -2.696002 | -1.778277 | 0.585281  | O | 2.797389  | 1.162486  | -1.072260 |
| C | -3.500241 | -0.643948 | 0.315113  | C | 0.726913  | 1.864852  | -4.192707 |

|   |           |           |           |   |           |           |           |
|---|-----------|-----------|-----------|---|-----------|-----------|-----------|
| O | 1.012428  | 1.466815  | -5.221726 | H | -1.072778 | 1.230302  | -2.018270 |
| B | -0.786065 | 0.044814  | -1.779880 | H | 0.973677  | -1.633359 | 0.093805  |
| H | 0.064630  | -0.541578 | -2.377766 |   |           |           |           |

13'

$E = -1424.9838856280$  au

$ZPE = 0.30572879$  au

$G_{\text{corr}} = 0.25126647$  au

|   |           |           |           |   |           |           |           |
|---|-----------|-----------|-----------|---|-----------|-----------|-----------|
| P | 0.125485  | -1.258981 | 0.378241  | H | -4.402983 | -2.565138 | 1.050111  |
| C | -0.025671 | -0.531241 | 2.066736  | H | -2.902898 | -3.458087 | 1.241118  |
| C | 1.376093  | -0.054316 | 2.456488  | H | -1.357485 | -2.863879 | -0.797477 |
| H | 1.336079  | 0.399905  | 3.448795  | H | -4.378058 | -0.292758 | -0.185679 |
| H | 2.094727  | -0.874226 | 2.497082  | H | -2.815406 | 0.694865  | -2.107884 |
| H | 1.759255  | 0.699428  | 1.766112  | W | 0.272061  | 2.583002  | -1.946182 |
| C | -0.996658 | 0.647749  | 2.039769  | C | 0.501819  | 4.351012  | -2.800121 |
| H | -2.000649 | 0.340410  | 1.753288  | O | 0.629458  | 5.385713  | -3.289198 |
| H | -1.047572 | 1.085465  | 3.038833  | C | -1.560026 | 3.192799  | -1.233903 |
| H | -0.671935 | 1.431127  | 1.354464  | O | -2.561234 | 3.577572  | -0.843753 |
| C | -0.515197 | -1.614707 | 3.026871  | C | 1.162505  | 3.312940  | -0.243224 |
| H | -0.557200 | -1.207802 | 4.039736  | O | 1.662173  | 3.741428  | 0.689600  |
| H | -1.516219 | -1.957171 | 2.764753  | C | 2.125888  | 2.004405  | -2.637728 |
| H | 0.152055  | -2.477798 | 3.045493  | O | 3.156771  | 1.710554  | -3.026715 |
| N | -1.382796 | -0.808707 | -1.491535 | C | -0.595485 | 1.862115  | -3.672098 |
| C | -1.473985 | -1.830325 | -0.441433 | O | -1.066619 | 1.488168  | -4.641292 |
| N | -2.727596 | -1.634122 | 0.240271  | B | 0.002343  | -0.171722 | -1.298514 |
| C | -3.385585 | -0.603047 | -0.471869 | H | 0.875560  | -0.441643 | -2.076020 |
| C | -2.599808 | -0.115920 | -1.430742 | H | -0.037769 | 1.012510  | -0.852605 |
| C | -3.472012 | -2.833213 | 0.553203  | H | 1.055889  | -2.303354 | 0.529077  |
| H | -3.714189 | -3.430505 | -0.335123 |   |           |           |           |

(7'→14')<sup>‡</sup>

$E = -1424.9737670081$  au

$ZPE = 0.30619920$  au

$G_{\text{corr}} = 0.25354442$  au

$\nu = -170.67$  cm<sup>-1</sup>

|   |           |           |           |   |           |           |           |
|---|-----------|-----------|-----------|---|-----------|-----------|-----------|
| P | 0.480319  | 0.079640  | -0.257338 | H | -5.261689 | -0.739369 | -1.693492 |
| C | 0.995026  | -0.428476 | 1.475235  | H | -4.712273 | 0.944409  | -1.585335 |
| C | 2.145766  | 0.559659  | 1.749726  | H | -4.922573 | -0.019199 | -0.112131 |
| H | 2.672595  | 0.224410  | 2.646672  | H | -2.766898 | -0.935300 | 0.771718  |
| H | 2.884517  | 0.575470  | 0.943045  | H | -2.987489 | -0.413674 | -3.389820 |
| H | 1.816460  | 1.578341  | 1.927613  | H | -0.539504 | -1.499200 | -2.744799 |
| C | -0.085859 | -0.317756 | 2.540721  | W | -0.389743 | 2.472369  | -0.449185 |
| H | -0.853412 | -1.079983 | 2.398212  | C | -0.801209 | 4.391656  | -0.922703 |
| H | 0.341956  | -0.475044 | 3.534644  | O | -1.031809 | 5.476792  | -1.209382 |
| H | -0.569585 | 0.658381  | 2.534880  | C | -2.319001 | 2.237627  | 0.185767  |
| C | 1.616434  | -1.827155 | 1.481523  | O | -3.375995 | 2.177963  | 0.623074  |
| H | 2.065711  | -2.018989 | 2.460205  | C | -0.068228 | 3.120129  | 1.474444  |
| H | 0.885284  | -2.604419 | 1.290372  | O | 0.054550  | 3.571003  | 2.517052  |
| H | 2.402575  | -1.915298 | 0.730686  | C | 1.593931  | 2.848621  | -0.889766 |
| N | -1.297180 | -1.358368 | -0.734665 | O | 2.686571  | 3.088140  | -1.108081 |
| C | -2.476389 | -0.909117 | -0.265928 | C | -0.775068 | 2.051018  | -2.428078 |
| N | -3.246847 | -0.505867 | -1.248438 | O | -0.978175 | 1.918562  | -3.544201 |
| C | -2.554914 | -0.678582 | -2.440652 | B | -1.052371 | -2.967911 | -0.269161 |
| C | -1.362444 | -1.202914 | -2.117888 | H | -1.149202 | -2.992976 | 0.933955  |
| C | -4.619585 | -0.048144 | -1.153054 | H | -1.955055 | -3.571253 | -0.809592 |

H 0.033928 -3.272693 -0.688911

14'

$E = -1424.9765759007$  au

$ZPE = 0.30678700$  au

$G_{\text{corr}} = 0.25410097$  au

P 0.451726 0.019372 -0.304162  
C 0.954805 -0.488254 1.441479  
C 2.052341 0.531823 1.781157  
H 2.548051 0.215967 2.702256  
H 2.823601 0.581863 1.007925  
H 1.672021 1.536271 1.945818  
C -0.146031 -0.437749 2.493386  
H -0.864491 -1.248185 2.362391  
H 0.281231 -0.556228 3.493162  
H -0.687011 0.508605 2.473688  
C 1.630211 -1.863423 1.438364  
H 2.045877 -2.066764 2.429738  
H 0.941655 -2.666194 1.196800  
H 2.450893 -1.897559 0.720628  
N -1.154949 -1.067774 -0.711935  
C -2.348811 -0.746595 -0.131370  
N -3.261927 -0.545015 -1.036636  
C -2.682641 -0.682893 -2.296695  
C -1.396405 -0.990686 -2.098127  
C -4.677310 -0.318099 -0.801220  
H -5.230477 -1.202076 -1.107787

H -5.007805 0.537423 -1.381566  
H -4.842948 -0.132491 0.254409  
H -2.514157 -0.701783 0.932808  
H -3.257606 -0.565315 -3.198817  
H -0.607467 -1.191227 -2.802552  
W -0.307525 2.525011 -0.559080  
C -0.575046 4.446252 -1.031302  
O -0.717254 5.552680 -1.315549  
C -2.331144 2.411992 -0.325404  
O -3.465195 2.467966 -0.161504  
C -0.272320 3.066860 1.419899  
O -0.303763 3.439361 2.501347  
C 1.723551 2.853904 -0.721814  
O 2.837034 3.086868 -0.813879  
C -0.447226 2.074572 -2.562113  
O -0.536490 1.875076 -3.683808  
B -1.067861 -2.833292 -0.380424  
H -1.099279 -2.931838 0.815262  
H -2.055505 -3.259816 -0.928719  
H -0.031228 -3.146110 -0.899109

(6'→15')<sup>‡</sup>

$E = -1425.0242454238$  au

$ZPE = 0.30541621$  au

$G_{\text{corr}} = 0.25176665$  au

$\nu = -115.61$  cm<sup>-1</sup>

P 0.370230 0.095951 0.031330  
C 0.184494 0.243419 1.894415  
C 1.341111 1.052606 2.475212  
H 1.227731 1.126039 3.559568  
H 2.304581 0.593156 2.263144  
H 1.367653 2.067816 2.079594  
C -1.140019 0.961021 2.158412  
H -1.992372 0.370010 1.819108  
H -1.259964 1.131698 3.231042  
H -1.192664 1.932200 1.665652  
C 0.144066 -1.141093 2.536282  
H -0.061467 -1.042509 3.605398  
H -0.638949 -1.767882 2.105652  
H 1.091736 -1.667362 2.428304  
N 3.388974 -0.738826 0.387716  
C 3.443111 -1.244977 -0.838500  
N 4.007641 -2.478948 -0.831372

C 4.282478 -2.781907 0.457298  
C 3.891996 -1.696093 1.201162  
C 4.166832 -3.340669 -1.982383  
H 3.300868 -3.990574 -2.095131  
H 5.059489 -3.948046 -1.863924  
H 4.274176 -2.732863 -2.876496  
H 3.311352 -0.682965 -1.750790  
H 4.714770 -3.725610 0.746403  
H 3.944323 -1.570791 2.270678  
W 0.811862 2.208186 -1.402339  
C 1.131528 3.760939 -2.618311  
O 1.312608 4.647827 -3.328380  
C -1.164098 2.119265 -1.953716  
O -2.266567 2.064328 -2.246922  
C 0.316520 3.574662 0.050875  
O 0.050498 4.395410 0.801016  
C 2.768910 2.274226 -0.758800

|   |          |           |           |   |           |           |           |
|---|----------|-----------|-----------|---|-----------|-----------|-----------|
| O | 3.854056 | 2.363327  | -0.417060 | H | 1.132128  | -1.760999 | -1.655659 |
| C | 1.306772 | 0.982248  | -2.971143 | H | 1.380292  | -2.451125 | 0.259189  |
| O | 1.584458 | 0.344538  | -3.879077 | H | -0.924905 | -0.389590 | -0.271125 |
| B | 1.270354 | -1.532536 | -0.489509 |   |           |           |           |

15'

$E = -1425.0336472295$  au

$ZPE = 0.30688649$  au

$G_{\text{corr}} = 0.25363102$  au

|   |           |           |           |   |           |           |           |
|---|-----------|-----------|-----------|---|-----------|-----------|-----------|
| P | 0.427203  | 0.041279  | 0.040122  | H | 4.465349  | -3.770919 | -2.260098 |
| C | 0.168606  | 0.293234  | 1.885972  | H | 3.809820  | -2.238066 | -2.870585 |
| C | 1.286125  | 1.161614  | 2.457457  | H | 3.316392  | -0.410281 | -1.071097 |
| H | 1.147984  | 1.277552  | 3.535700  | H | 5.012303  | -3.856138 | 0.172170  |
| H | 2.266390  | 0.716450  | 2.289293  | H | 4.725990  | -2.106326 | 2.280997  |
| H | 1.289802  | 2.160285  | 2.020126  | W | 0.882170  | 2.126313  | -1.444400 |
| C | -1.183019 | 0.979133  | 2.082364  | C | 1.230259  | 3.634455  | -2.708507 |
| H | -2.006401 | 0.345534  | 1.747985  | O | 1.428689  | 4.495510  | -3.446576 |
| H | -1.340340 | 1.195856  | 3.142203  | C | -1.028788 | 1.870716  | -2.158195 |
| H | -1.252223 | 1.923094  | 1.541995  | O | -2.095928 | 1.717124  | -2.534694 |
| C | 0.152614  | -1.056798 | 2.599713  | C | 0.174619  | 3.527788  | -0.119563 |
| H | -0.081356 | -0.910103 | 3.657863  | O | -0.202027 | 4.368276  | 0.558714  |
| H | -0.599949 | -1.728552 | 2.183019  | C | 2.745944  | 2.320381  | -0.607120 |
| H | 1.117483  | -1.558120 | 2.536464  | O | 3.781820  | 2.444210  | -0.138188 |
| N | 3.585744  | -0.998656 | 0.916586  | C | 1.602729  | 0.861547  | -2.891321 |
| C | 3.153239  | -1.240271 | -0.381976 | O | 2.013151  | 0.204553  | -3.733405 |
| N | 3.830087  | -2.431775 | -0.803506 | B | 1.476922  | -1.557182 | -0.388686 |
| C | 4.474510  | -2.921102 | 0.207585  | H | 1.182325  | -1.813672 | -1.534862 |
| C | 4.308557  | -2.001213 | 1.290666  | H | 1.269626  | -2.486221 | 0.354268  |
| C | 3.698043  | -3.016430 | -2.120807 | H | -0.850716 | -0.473692 | -0.270007 |
| H | 2.712846  | -3.465882 | -2.220859 |   |           |           |           |

## 8 References

- 1 W. L. E. Armarego, *Purification of Laboratory Chemicals*, Elsevier, Amsterdam, 5<sup>th</sup> edn., 2003.
- 2 G. R. Fulmer, A. J. M. Miller, N. H. Sherden, H. E. Gottlieb, A. Nudelman, B. M. Stoltz, J. E. Bercaw and K. I. Goldberg, *Organometallics*, 2010, **29**, 2176–2179.
- 3 a) R. K. Harris, E. D. Becker, S. M. Cabral de Menezes, R. Goodfellow and P. Granger, *Pure Appl. Chem.*, 2001, **73**, 1795–1818; b) R. K. Harris, E. D. Becker, S. M. Cabral de Menezes, P. Granger, R. E. Hoffman and K. W. Zilm, *Pure Appl. Chem.*, 2008, **80**, 59–84.
- 4 R. H. Blessing, *Acta Crystallogr., Sect. A: Found. Crystallogr.*, 1995, **51**, 33–38.
- 5 G. M. Sheldrick, ShelXS97 and ShelXL97, University of Göttingen, 1997.
- 6 O. V. Dolomanov, L. J. Bourhis, R. J. Gildea, J. A. K. Howard and H. Puschmann, *J. Appl. Crystallogr.*, 2009, **42**, 339–341.
- 7 D. Biskup, G. Schnakenburg, R. T. Boéré, A. Espinosa Ferao and R. K. Streubel, *Nat. Commun.*, 2023, **14**, 6456.
- 8 ORCA – An *ab initio* DFT and semiempirical SCF-MO package. Written by F. Neese, Max Planck Institute for Bioinorganic Chemistry, 45470 Mülheim/Ruhr, Germany, 2019. Version 4.2.1. Website: <https://orcaforum.kofo.mpg.de/index.php>. F. Neese, “The ORCA program system”, *WIREs Comput. Mol. Sci.*, 2012, **2**, 73–78. F. Neese, “Software update: the ORCA program system, version 4.0”, *WIREs Comput. Mol. Sci.*, 2018, **8**, e1327.
- 9 S. Grimme, J. G. Brandenburg, C. Bannwarth and A. Hansen, *J. Chem. Phys.*, 2015, **143**, 054107.
- 10 a) S. Grimme, J. Antony, S. Ehrlich and H. Krieg, *J. Chem. Phys.*, 2010, **132**, 154104. b) S. Grimme, S. Ehrlich and L. Goerigk, *J. Comput. Chem.*, 2011, **32**, 1456–1465.
- 11 a) L. Goerigk and S. Grimme, *J. Chem. Theory Comput.*, 2011, **7**, 291–309. b) L. Goerigk and S. Grimme, *Phys. Chem. Chem. Phys.*, 2011, **13**, 6670–6688.
- 12 a) F. Weigend, F. Furche and R. Ahlrichs, *J. Chem. Phys.*, 2003, **119**, 12753–12762. b) A. Schäfer, C. Huber and R. Ahlrichs, *J. Chem. Phys.*, 1994, **100**, 5829–5835. c) F. Weigend and R. Ahlrichs, *Phys. Chem. Chem. Phys.*, 2005, **7**, 3297–3305.
- 13 a) A. D. Becke, *J. Chem. Phys.*, 1993, **98**, 5648–5652. b) C. Lee, W. Yang and R. G. Parr, *Phys. Rev. B*, 1988, **37**, 785–789.
- 14 AIMAll (Version 14.06.21), Todd A Keith, TK Gristmill Software, Overland Park KS, USA, 2014 ([aim.tkgristmill.com](http://aim.tkgristmill.com)).
- 15 a) V. Barone and M. Cossi, *J. Phys. Chem. A*, 1998, **102**, 1995–2001. b) M. Cossi, N. Rega, G. Scalmani and V. Barone, *J. Comp. Chem.*, 2003, **24**, 669–681.
- 16 G. Schreckenbach and T. Ziegler, *J. Phys. Chem.*, 1995, **99**, 606–611.
- 17 a) J. P. Perdew, K. Burke and M. Ernzerhof, *Phys. Rev. Lett.*, 1996, **77**, 3865–3868. b) J. P. Perdew, K. Burke and M. Ernzerhof, *Phys. Rev. Lett.*, 1997, **78**, 1396.

18 a) A. Gese, S. Kermanshahian, G. Schnakenburg, Z. Kelemen, L. Nyulaszi, A. Espinosa Ferao and R. K. Streubel, *Inorg. Chem.*, 2021, **60**, 13029–13040. b) D. Biskup, G. Schnakenburg, R. T. Boéré, A. Espinosa Ferao and R. Streubel, *Dalton Trans.*, 2023, **52**, 13781–13786. c) F. Gleim, G. Schnakenburg, A. Espinosa Ferao and R. Streubel, *Chem. Commun.*, accepted, DOI: [10.1039/D4CC00254G](https://doi.org/10.1039/D4CC00254G).
